# Supplementary material
Source: ML conference proceedings conference paper supplement (https://proceedings.mlr.press/v89/fernandez19a.html)
Supplement: Supplementary file [file fernandez19a-supp.pdf]

# Supplemental Material: A kernel-based goodness-of-fit test for censored data.

Tamara Fernández  
 Gatsby Computational Neuroscience Unit  
 University College London  
 t.a.fernandez@ucl.ac.uk

Arthur Gretton  
 Gatsby Computational Neuroscience Unit  
 University College London  
 gretton@gatsby.ucl.ac.uk

February 24, 2019

## 1 Proofs

**Proof (Proposition 3.1) :** Let  $T = \min\{X, C\}$  and  $\Delta = \mathbb{1}\{T = X\}$  with  $X \sim F$  independent of  $C \sim G$ . Let  $F_0$  be a continuous distribution on  $\mathbb{R}$  and define  $U = F_0(T)$ , then the joint distribution  $Q$  of the pair  $(U, \Delta)$  is given by

$$\begin{aligned}
 \mathbb{P}(U \leq u, \Delta = 1) &= \mathbb{P}(\min\{F_0(X), F_0(C)\} \leq u, F_0(X) \leq F_0(C)) \\
 &= \mathbb{P}(F_0(X) \leq u, F_0(X) \leq F_0(C)) \\
 &= \mathbb{P}(X \leq F_0^{-1}(u), X \leq C) \\
 &= \int_0^{F_0^{-1}(u)} \mathbb{P}(x \leq C) dF(x) \\
 &= \int_0^{F_0^{-1}(u)} [1 - G(x)] dF(x) \\
 &= \int_0^u [1 - G(F_0^{-1}(x))] dF(F_0^{-1}(x)), \tag{1}
 \end{aligned}$$

and

$$\begin{aligned}
 \mathbb{P}(U \leq u, \Delta = 0) &= \mathbb{P}(\min\{F_0(X), F_0(C)\} \leq u, F_0(X) > F_0(C)) \\
 &= \mathbb{P}(F_0(C) \leq u, F_0(X) > F_0(C)) \\
 &= \mathbb{P}(C \leq F_0^{-1}(u), X > C) \\
 &= \int_0^{F_0^{-1}(u)} \mathbb{P}(X > c) dG(c) \\
 &= \int_0^{F_0^{-1}(u)} [1 - F(c)] dG(c) \\
 &= \int_0^u [1 - F(F_0^{-1}(c))] dG(F_0^{-1}(c)), \tag{2}
 \end{aligned}$$

Let  $u \in [0, 1]$  be fixed, we define the random variable

$$Z^u(U, \Delta) = \mathbb{1}\{U \leq u\} \Delta + \mathbb{1}\{U > u\} (1 - \Delta) \frac{u - U}{1 - U}.$$

By the strong law of large numbers, it holds

$$\hat{F}(u) = \frac{1}{n} \sum_{i=1}^n Z_i^u \xrightarrow{a.s.} \mathbb{E}(Z^u),$$

where (computed by using the joint distribution  $Q$  of the pair  $(U, \Delta)$ )

$$\begin{aligned}\mathbb{E}(Z^u) &= \int_0^u (1 - GF_0^{-1}(s))dFF_0^{-1}(s) + \int_0^u \frac{u-s}{1-s}(1 - FF_0^{-1}(s))dGF_0^{-1}(s) \\ &= FF_0^{-1}(u) - \left[ FF_0^{-1}(u) - \int_0^u FF_0^{-1}(s)dGF_0^{-1}(s) \right] + \int_0^u \frac{u-s}{1-s}(1 - FF_0^{-1}(s))dGF_0^{-1}(s) \\ &= FF_0^{-1}(u) + \int_0^u \frac{1}{1-s}[(1-s)(1 - FF_0^{-1}(u)) - (1-u)(1 - FF_0^{-1}(s))]dGF_0^{-1}(s),\end{aligned}$$

(the second equality follows from integration by parts) which is an unbiased estimator of  $FF_0^{-1}$  when  $F = F_0$ , in which case  $E(Z^u) = u$ . Observe that in the case of extreme censoring, for example  $G$  is delta measure on zero,  $E(Z^u) = u$  which reflects our lack of information.  $\blacksquare$

**Proof (Lemma 4.4) :** By the main theorem of section 5.2.2. of [29], it suffices to prove that  $\mathbb{E}(J(U, \Delta), (U', \Delta')^2) < \infty$ , where  $(U, \Delta), (U', \Delta') \stackrel{i.i.d.}{\sim} Q$  and that the kernel  $J$  is degenerated.

**Degeneracy:** For the degeneracy, note that

$$\begin{aligned}\mathbb{E}[J((u, \delta), (U, \Delta))] &= \mathbb{E} \left( \int_0^1 \int_0^1 K(x, y)(dx - dh_{u, \delta}(x))(dy - dh_{U, \Delta}(y)) \right) \\ &= \mathbb{E} \left( \int_0^1 \psi_{u, \delta}(y)(dy - dh_{U, \Delta}(y)) \right),\end{aligned}$$

where  $\psi_{u, \delta}(y) = \int_0^1 K(x, y)(dx - dh_{u, \delta}(x))$ . By using equation (3), it holds

$$\begin{aligned}\mathbb{E}[J((u, \delta), (U, \Delta))] &= \int_0^1 \psi_{u, \delta}(y)dy - \mathbb{E} \left( \int_U^1 \psi_{u, \delta}(y) \frac{1-\Delta}{1-U} dy + \Delta \psi_{u, \delta}(U) \right) \\ &= \int_0^1 \psi_{u, \delta}(y)dy - \int_0^1 \int_x^1 \psi_{u, \delta}(y)dydG(x) - \int_0^1 (1 - G(x))\psi_{u, \delta}(x)dx \\ &= \int_0^1 \psi_{u, \delta}(y)dy - \int_0^1 G(y)\psi_{u, \delta}(y)dy - \int_0^1 (1 - G(x))\psi_{u, \delta}(x)dx = 0.\end{aligned}$$

$\mathbb{E}(J^2) < \infty$  : We continue by checking the finite variance condition, that is  $\mathbb{E}(J((U, \Delta), (U', \Delta')^2)) < \infty$ . Under assumption 4.1, observe that

$$\begin{aligned}\mathbb{E}(J((U, \Delta), (U', \Delta')^2)) &= \mathbb{E} \left( \left[ \int_0^1 \int_0^1 K(x, y)(dx - dh_{U, \Delta}(x))(dy - dh_{U', \Delta'}(y)) \right]^2 \right) \\ &\leq M^2 \left( 1 + \mathbb{E} \left( \left( \int_0^1 dh_{U, \Delta}(x) \right)^4 \right) \right) \\ &\leq 2M^2,\end{aligned}\tag{3}$$

since  $h_{U, \Delta}(x)$  is a cumulative distribution function.

**Diagonal:** We finalize by analysing the asymptotic behaviour of the diagonal term. Under assumption 4.1, it holds

$$\begin{aligned}\mathbb{E}(J((U, \Delta), (U, \Delta))) &= \mathbb{E} \left( \int_0^1 \int_0^1 K(x, y)(dx - dh_{U, \Delta}(x))(dy - dh_{U, \Delta}(y)) \right) \\ &\leq M \left( 1 + \mathbb{E} \left( \left( \int_0^1 dh_{U, \Delta}(x) \right)^2 \right) \right), \\ &\leq 2M\end{aligned}\tag{4}$$

since  $h_{U, \Delta}(x)$  is a distribution function. Then by the strong law of large numbers, the diagonal of the  $V$ -statistic converges to

$$n\text{Diag} = \frac{1}{n} \sum_{i=1}^n J((U_i, \Delta_i), (U_i, \Delta_i)) \xrightarrow{a.s.} \mathbb{E}(J((U, \Delta), (U, \Delta))).\tag{5}$$

**Proof (of Proposition 4.3) :** Equation (5) follows easily from equation (3). The unbiasedness of the U-statistic in equation (6) follows from the degeneracy property (proved in Lemma 4.4).  $\blacksquare$

## 1.1 Proof of Proposition 4.2

In this section, instead of proving Proposition 4.2, we prove a even stronger result. Suppose that each data point  $i$  generates a (random) probability measure  $\alpha_i$  in  $[0, 1]$  and suppose all these points are independent and thus the measures they represent are also independent. We define the measure  $\alpha$  as the expected measure of  $\alpha_i$ , i.e. for  $A \subseteq [0, 1]$  measurable, we define  $\alpha(A) = \mathbb{E}(\alpha_i(A))$ . In our setting, under the null it holds  $\alpha_i([0, x]) = \mathbf{1}\{U < x\} \left( \Delta_i + (1 - \Delta) \frac{x-U}{1-U} \right)$ , and  $\alpha([0, x]) = \mathbb{E}(\alpha_i([0, x])) = x$  for  $x \in [0, 1]$ . Our estimator  $\tilde{F}(x)$  corresponds to  $n^{-1} \sum_{i=1}^n \alpha_i([0, x])$ . We prove the following theorem.

**Theorem 1.1.** *Let  $K : [0, 1]^2 \rightarrow \mathbb{R}$  be a kernel such that it exist  $M \geq 1$  with  $|K(x, y)| \leq M$  for all  $x, y$ . Then*

$$\mathbb{E} \left( \text{MMD} \left( \frac{1}{n} \sum_i \alpha_i(\cdot), \alpha(\cdot) \right)^2 \right) \leq \frac{4M}{n} \quad (6)$$

and, moreover, for all  $\varepsilon > 0$  and  $n \geq 2$  it holds

$$\mathbb{P} \left( \left| \text{MMD} \left( \frac{1}{n} \sum_i \alpha_i, \alpha \right)^2 - \mathbb{E} \left( \text{MMD} \left( \frac{1}{n} \sum_i \alpha_i, \alpha \right)^2 \right) \right| > \varepsilon \right) \leq \exp(-\varepsilon^2 n / (32M^2)) \quad (7)$$

**Proof:**

Denote the signed measure  $\beta_i = (\alpha_i - \alpha)$ , and for shortness, denote  $Z = \text{MMD} \left( \frac{1}{n} \sum_i \alpha_i, \alpha \right)$ , then

$$Z^2 = \frac{1}{n^2} \int_{[0,1]^2} K(x, y) \sum_{i,j} \beta_i(dx) \beta_j(dy) = \frac{1}{n^2} \sum_{i,j} \int_{[0,1]^2} K(x, y) \beta_i(dx) \beta_j(dy) \quad (8)$$

Using that  $\mathbb{E}(Z) \leq \mathbb{E}(Z^2)^{1/2}$ , we get

$$\mathbb{E}Z \leq \frac{n-1}{n} \mathbb{E} \int_{[0,1]^2} K(x, y) \beta_1(dx) \beta_2(dy) + \frac{1}{n} \mathbb{E} \int_{[0,1]^2} K(x, y) \beta_1(dx) \beta_1(dy) \quad (9)$$

Note that  $|\beta_1(dx)| \leq \alpha_1(dx) + \alpha(dx)$ , then

$$\mathbb{E} \int_{[0,1]^2} K(x, y) \beta_1(dx) \beta_1(dy) \leq M \mathbb{E} \int_{[0,1]^2} (\alpha_1(dx) + \alpha(x)) (\alpha_1(dx) + \alpha(x)) = 4M \quad (10)$$

Now, we claim that

$$\mathbb{E} \int_{[0,1]^2} K(x, y) \beta_1(dx) \beta_2(dy) = 0 \quad (11)$$

as  $\beta_1$  and  $\beta_2$  are i.i.d measures, and for all measurable sets  $A \subseteq [0, 1]$  it holds  $\mathbb{E}(\beta_1(A)) = 0$ . To check equation (11) we suppose that  $K(x, y) = \sum_{k=1}^N c_k \mathbf{1}_{S_k}(x, y)$  where  $S_k$  are rectangles in  $[0, 1]^2$ , i.e.  $K$  is a simple function in  $[0, 1]^2$ . For a rectangle  $S = [x, x'] \times [y, y'] \in [0, 1]^2$  we denote  $S^1 = [x, x']$  and  $S^2 = [y, y']$ . Then

$$\mathbb{E} \int_{[0,1]^2} K(x, y) \beta_1(dx) \beta_2(dy) = \sum_{k=1}^N c_k \mathbb{E} \beta_1(S_k^1) \mathbb{E} \beta_2(S_k^2) = 0$$

then as any arbitrary  $K$  can be approximated by simple functions, as our kernel  $K$  is bounded by  $M$ , and  $\beta$  is the difference of two probability measures, by the dominated convergence theorem equation (11) holds for an arbitrary bounded kernel. This proves the first part of the theorem.

For the second part, i.e. concentration. Let  $Z'$  be the random variable  $Z$  but replacing the data point  $j$  by another  $j'$  (which is independent of everything). From equation (8) it holds that  $Z^2 - Z'^2$  equals

$$\frac{1}{n^2} \int_{[0,1]^2} K(x, y) [\beta_j(dx) \beta_j(dy) - \beta_{j'}(dx) \beta_{j'}(dy)] + \frac{1}{n^2} \sum_{i \neq j} \int_{[0,1]^2} K(x, y) \beta_i(dx) (\beta_j(dy) - \beta_{j'}(dy))$$

Using the same argument as equation (10) the the absolute value of the above sum is less or equal than  $8M/n$ . By the McDiarmid inequality we obtain the result.  $\blacksquare$

## 2 Kernel-based test

In this section, we show results for an extra competitor based on a kernel approach, [4] ( see reference in the main file). In particular, this approach considers a kernel density estimate for the survival function, i.e., for  $S = 1 - F$  which is obtained by using a slightly modified Kaplan-Meier procedure. Then, the test-statistic is defined as the squared difference between this density estimate and the model density. The implementation of this test was directly derived from the code made available by the authors in [4] (see reference in the main file).

Since this procedure relies on density estimation as an intermediate step, it has been found to be relatively data-inefficient, compared with more direct tests, see e.g. the recent discussion in [13] (in the main file).

For instance, for the periodic hazard experiment and under censoring parameter  $\gamma = 1/2$ , we obtain a fairly correct estimation of the Type-I error (the null is recovered by considering  $\theta_2 = 0$  in the model).

| Type-I error |       |      |       |
|--------------|-------|------|-------|
| $\alpha$     | n=30  | n=50 | n=100 |
| 10 %         | 11.25 | 8.65 | 7     |
| 5 %          | 5.35  | 4.65 | 3.6   |
| 1 %          | 1.3   | 1.1  | 0.9   |

Nevertheless for alternatives that are distinguishable by other tests as for example for the periodic hazard setting with censoring parameter  $\gamma = 1/2$  and  $\theta = (\theta_1, 1)$  and  $\theta_1 \in \{0.5, 0.9, 1.5\}$ , we obtain the following results

| Power               |      |      |       |
|---------------------|------|------|-------|
| $\alpha = 5\%$      | n=30 | n=50 | n=100 |
| $\theta = (0.5, 1)$ | 22.4 | 43.4 | 73.45 |
| $\theta = (0.9, 1)$ | 3.65 | 4.95 | 14.1  |
| $\theta = (1.5, 1)$ | 3.35 | 5.4  | 10.4  |

From the table above, we observe that the power increases as the sample size increases, nevertheless the power attained by this particular test is clearly inferior compared to all the other competitors. This behaviour is also observed for the parallel and Weibull experiments. Therefore, we omit this test from our comparisons.

## 3 Proportional hazards experiment

### 3.1 Type-I error

Estimated Type-I error. In **red** we observe tests that have an clear incorrect level. In **orange**, we observe tests that have a questionable incorrect level

#### 3.1.1 Parallel hazards experiment: Censoring 30%

##### Fixed length-scale 1

| Type-I error      |       |       |       |              |       |       |              |
|-------------------|-------|-------|-------|--------------|-------|-------|--------------|
|                   | MW1   | MW2   | MW3   | Pearson      | LR1   | LR2   | WLR          |
| Sample size n=30  |       |       |       |              |       |       |              |
| 10 %              | 10.10 | 11.70 | 10.20 | <b>14.50</b> | 11.15 | 11.10 | <b>19.65</b> |
| 5 %               | 5.10  | 6.55  | 4.85  | <b>8.70</b>  | 5.90  | 6.60  | <b>13.65</b> |
| 1 %               | 1.15  | 2.05  | 1.10  | <b>3.05</b>  | 1.60  | 1.30  | <b>6.30</b>  |
| Sample size n=50  |       |       |       |              |       |       |              |
| 10 %              | 10.65 | 11.70 | 10.75 | <b>13.35</b> | 11.30 | 10.45 | <b>17.80</b> |
| 5 %               | 5.50  | 6.20  | 5.75  | <b>8.15</b>  | 6.10  | 5.80  | <b>11.85</b> |
| 1 %               | 1.20  | 1.60  | 1.10  | <b>2.65</b>  | 1.45  | 1.35  | <b>4.60</b>  |
| Sample size n=100 |       |       |       |              |       |       |              |
| 10 %              | 11.10 | 11.60 | 10.90 | 11.00        | 10.95 | 11.10 | <b>13.00</b> |
| 5 %               | 5.90  | 6.10  | 5.75  | 6.40         | 5.85  | 6.00  | <b>8.40</b>  |
| 1 %               | 1.25  | 1.40  | 1.30  | 2.20         | 1.35  | 1.35  | <b>2.85</b>  |

##### Adaptive length-scale

| Type-I error      |       |       |       |         |       |       |       |
|-------------------|-------|-------|-------|---------|-------|-------|-------|
|                   | MW1   | MW2   | MW3   | Pearson | LR1   | LR2   | WLR   |
| Sample size n=30  |       |       |       |         |       |       |       |
| 10 %              | 9.35  | 10.70 | 9.70  | 14.50   | 11.15 | 11.10 | 19.65 |
| 5 %               | 4.40  | 5.45  | 4.50  | 8.70    | 5.90  | 6.60  | 13.65 |
| 1 %               | 0.95  | 1.45  | 0.95  | 3.05    | 1.60  | 1.30  | 6.30  |
| Sample size n=50  |       |       |       |         |       |       |       |
| 10 %              | 10.50 | 11.30 | 10.55 | 13.35   | 11.30 | 10.45 | 17.80 |
| 5 %               | 5.35  | 5.85  | 5.15  | 8.15    | 6.10  | 5.80  | 11.85 |
| 1 %               | 0.70  | 1.20  | 0.85  | 2.65    | 1.45  | 1.35  | 4.60  |
| Sample size n=100 |       |       |       |         |       |       |       |
| 10 %              | 10.65 | 10.90 | 10.70 | 11.00   | 10.95 | 11.10 | 13.00 |
| 5 %               | 5.50  | 5.45  | 5.50  | 6.40    | 5.85  | 6.00  | 8.40  |
| 1 %               | 1.20  | 1.40  | 1.15  | 2.20    | 1.35  | 1.35  | 2.85  |

### 3.1.2 Parallel hazards experiment: Censoring 50%

#### Fixed length-scale 1

| Type-I error      |       |       |       |         |       |       |       |
|-------------------|-------|-------|-------|---------|-------|-------|-------|
|                   | MW1   | MW2   | MW3   | Pearson | LR1   | LR2   | WLR   |
| Sample size n=30  |       |       |       |         |       |       |       |
| 10 %              | 10.50 | 11.80 | 10.50 | 15.30   | 10.50 | 10.25 | 19.25 |
| 5 %               | 4.45  | 5.90  | 4.50  | 10.15   | 5.75  | 5.70  | 14.05 |
| 1 %               | 1.05  | 1.65  | 1.05  | 5.30    | 1.30  | 1.65  | 6.35  |
| Sample size n=50  |       |       |       |         |       |       |       |
| 10 %              | 10.70 | 11.45 | 10.75 | 14.75   | 10.65 | 10.50 | 16.25 |
| 5 %               | 5.55  | 6.50  | 5.70  | 9.30    | 5.90  | 5.10  | 10.90 |
| 1 %               | 1.35  | 1.45  | 1.20  | 5.10    | 1.60  | 1.35  | 4.40  |
| Sample size n=100 |       |       |       |         |       |       |       |
| 10 %              | 12.20 | 12.70 | 12.20 | 13.25   | 11.45 | 11.65 | 14.10 |
| 5 %               | 6.15  | 6.35  | 6.00  | 8.70    | 5.85  | 5.80  | 8.25  |
| 1 %               | 1.45  | 1.65  | 1.45  | 2.20    | 1.35  | 1.30  | 3.15  |

#### Adaptive length-scale

| Type-I error      |       |       |       |         |       |       |       |
|-------------------|-------|-------|-------|---------|-------|-------|-------|
|                   | MW1   | MW2   | MW3   | Pearson | LR1   | LR2   | WLR   |
| Sample size n=30  |       |       |       |         |       |       |       |
| 10 %              | 8.65  | 10.05 | 8.40  | 15.30   | 10.50 | 10.25 | 19.25 |
| 5 %               | 4.55  | 5.25  | 4.50  | 10.15   | 5.75  | 5.70  | 14.05 |
| 1 %               | 1.05  | 1.30  | 0.95  | 5.30    | 1.30  | 1.65  | 6.35  |
| Sample size n=50  |       |       |       |         |       |       |       |
| 10 %              | 9.45  | 10.25 | 9.40  | 14.75   | 10.65 | 10.50 | 16.25 |
| 5 %               | 4.85  | 5.50  | 4.80  | 9.30    | 5.90  | 5.10  | 10.90 |
| 1 %               | 1.20  | 1.40  | 1.20  | 5.10    | 1.60  | 1.35  | 4.40  |
| Sample size n=100 |       |       |       |         |       |       |       |
| 10 %              | 11.00 | 11.25 | 11.05 | 13.25   | 11.45 | 11.65 | 14.10 |
| 5 %               | 5.40  | 5.60  | 5.25  | 8.70    | 5.85  | 5.80  | 8.25  |
| 1 %               | 1.35  | 1.50  | 1.40  | 2.20    | 1.35  | 1.30  | 3.15  |

### 3.2 Parallel hazard functions - Sample size $n = 30$ - Significance $\alpha = 0.05$ - Fixed length-scale 1

| rate<br>cens | MW1   |       | MW2   |       | MW3   |       | Pearson |       | LR1   |       | LR2   |       | WLR   |       |
|--------------|-------|-------|-------|-------|-------|-------|---------|-------|-------|-------|-------|-------|-------|-------|
|              | 30%   | 50%   | 30%   | 50%   | 30%   | 50%   | 30%     | 50%   | 30%   | 50%   | 30%   | 50%   | 30%   | 50%   |
| 0.5          | 74.30 | 67.45 | 78.15 | 72.05 | 74.40 | 67.60 | 64.90   | 45.20 | 88.20 | 77.45 | 78.40 | 65.40 | 62.70 | 42.80 |
| 0.55         | 62.55 | 55.40 | 66.55 | 59.75 | 62.60 | 55.75 | 47.70   | 30.80 | 77.10 | 63.25 | 65.40 | 51.95 | 46.15 | 29.35 |
| 0.6          | 50.30 | 44.70 | 55.05 | 49.15 | 50.85 | 44.70 | 30.80   | 19.30 | 62.95 | 49.85 | 51.65 | 37.70 | 31.30 | 20.30 |
| 0.65         | 39.00 | 33.35 | 43.50 | 37.80 | 39.15 | 33.45 | 19.40   | 12.10 | 48.35 | 35.65 | 38.25 | 26.30 | 22.30 | 13.80 |
| 0.7          | 28.20 | 25.20 | 32.55 | 28.55 | 27.90 | 25.35 | 11.85   | 8.90  | 34.40 | 24.65 | 25.20 | 18.25 | 15.85 | 10.50 |
| 0.75         | 19.35 | 18.15 | 22.55 | 20.80 | 19.45 | 17.65 | 8.30    | 6.55  | 22.45 | 15.90 | 15.85 | 12.35 | 12.60 | 9.45  |
| 0.8          | 12.90 | 12.55 | 15.40 | 14.95 | 13.00 | 12.90 | 6.30    | 6.25  | 14.10 | 10.15 | 9.80  | 8.25  | 10.20 | 9.25  |
| 0.85         | 8.50  | 9.45  | 10.80 | 11.65 | 8.15  | 9.65  | 5.60    | 6.85  | 9.35  | 7.20  | 6.80  | 6.35  | 10.15 | 9.65  |
| 0.9          | 5.90  | 6.90  | 7.45  | 8.85  | 5.95  | 6.90  | 5.85    | 8.05  | 6.80  | 5.10  | 5.30  | 4.65  | 10.20 | 11.45 |
| 0.95         | 5.25  | 5.55  | 6.35  | 6.90  | 5.10  | 5.35  | 7.10    | 8.75  | 5.45  | 5.10  | 5.70  | 4.70  | 12.00 | 12.55 |
| 1            | 5.10  | 4.45  | 6.55  | 5.90  | 4.85  | 4.50  | 8.70    | 10.15 | 5.90  | 5.75  | 6.60  | 5.70  | 13.65 | 14.05 |
| 1.05         | 5.90  | 4.60  | 7.45  | 6.55  | 5.80  | 4.90  | 10.55   | 12.05 | 7.65  | 6.90  | 7.90  | 6.75  | 16.20 | 15.55 |
| 1.1          | 7.65  | 5.95  | 9.25  | 7.80  | 7.60  | 6.05  | 13.05   | 15.10 | 10.25 | 9.00  | 9.85  | 8.75  | 18.80 | 17.95 |
| 1.15         | 9.30  | 7.35  | 11.30 | 8.75  | 9.10  | 7.30  | 16.40   | 17.50 | 12.90 | 11.80 | 13.05 | 10.95 | 22.25 | 20.55 |
| 1.2          | 11.85 | 9.15  | 14.60 | 11.75 | 12.25 | 9.00  | 19.80   | 19.70 | 16.55 | 15.10 | 15.85 | 14.45 | 25.60 | 23.80 |
| 1.25         | 14.95 | 11.65 | 17.45 | 14.25 | 15.05 | 11.40 | 23.50   | 21.75 | 21.15 | 18.30 | 19.65 | 16.90 | 29.20 | 27.20 |
| 1.3          | 18.00 | 14.25 | 21.40 | 16.45 | 18.15 | 14.15 | 26.55   | 24.55 | 27.55 | 22.85 | 24.05 | 19.65 | 33.45 | 29.80 |
| 1.35         | 22.25 | 16.90 | 26.50 | 19.95 | 22.15 | 16.75 | 32.20   | 26.80 | 32.80 | 26.20 | 28.65 | 23.15 | 38.30 | 32.55 |
| 1.4          | 27.15 | 19.80 | 31.65 | 23.85 | 27.05 | 19.75 | 35.20   | 30.00 | 38.25 | 31.00 | 33.20 | 26.60 | 42.05 | 36.00 |
| 1.45         | 32.10 | 23.45 | 37.10 | 27.65 | 32.00 | 23.15 | 39.35   | 32.20 | 44.15 | 34.95 | 38.35 | 30.70 | 46.55 | 38.95 |
| 1.5          | 38.05 | 26.90 | 42.05 | 31.40 | 37.40 | 27.15 | 44.65   | 34.55 | 50.25 | 39.60 | 42.05 | 34.35 | 51.80 | 42.15 |
| 1.55         | 43.20 | 30.35 | 47.25 | 35.25 | 43.20 | 30.70 | 48.55   | 38.40 | 56.10 | 44.65 | 46.85 | 37.55 | 55.70 | 45.55 |
| 1.6          | 47.90 | 34.25 | 53.50 | 38.15 | 48.15 | 34.05 | 53.15   | 40.50 | 60.90 | 48.50 | 51.90 | 41.55 | 60.60 | 49.15 |
| 1.65         | 53.00 | 37.25 | 58.00 | 41.60 | 53.45 | 37.05 | 56.90   | 44.30 | 66.15 | 52.50 | 56.00 | 44.95 | 64.95 | 52.30 |
| 1.7          | 57.55 | 40.30 | 63.15 | 46.25 | 58.25 | 41.30 | 62.05   | 47.70 | 70.00 | 55.70 | 60.45 | 48.85 | 69.00 | 55.25 |
| 1.75         | 63.30 | 44.40 | 67.55 | 49.80 | 63.00 | 44.70 | 65.60   | 50.55 | 73.95 | 60.60 | 63.75 | 52.10 | 72.00 | 59.10 |
| 1.8          | 67.60 | 47.90 | 72.00 | 53.60 | 67.10 | 47.80 | 69.55   | 53.85 | 78.50 | 64.10 | 67.50 | 54.45 | 75.95 | 61.65 |
| 1.85         | 71.50 | 51.10 | 75.25 | 56.55 | 71.50 | 51.30 | 72.90   | 56.95 | 81.85 | 67.20 | 71.45 | 57.60 | 79.05 | 64.50 |
| 1.9          | 75.00 | 54.40 | 79.00 | 59.95 | 74.65 | 54.65 | 75.65   | 59.20 | 84.60 | 70.05 | 74.50 | 60.35 | 81.70 | 67.15 |
| 1.95         | 77.65 | 57.55 | 81.65 | 63.10 | 77.95 | 57.25 | 78.20   | 61.30 | 86.95 | 73.10 | 78.20 | 62.95 | 84.20 | 69.50 |
| 2            | 80.90 | 61.20 | 84.55 | 66.20 | 81.10 | 60.55 | 81.35   | 64.20 | 89.05 | 75.55 | 81.70 | 65.50 | 86.50 | 72.00 |

### 3.3 Parallel hazard functions - Sample size $n = 30$ - Significance $\alpha = 0.05$ - Adaptive length-scale

| rate<br>cens | MW1   |       | MW2   |       | MW3   |       | Pearson |       | LR1   |       | LR2   |       | WLR   |       |
|--------------|-------|-------|-------|-------|-------|-------|---------|-------|-------|-------|-------|-------|-------|-------|
|              | 30%   | 50%   | 30%   | 50%   | 30%   | 50%   | 30%     | 50%   | 30%   | 50%   | 30%   | 50%   | 30%   | 50%   |
| 0.5          | 70.65 | 63.75 | 73.85 | 66.95 | 70.60 | 63.45 | 64.90   | 45.20 | 88.20 | 77.45 | 78.40 | 65.40 | 62.70 | 42.80 |
| 0.55         | 57.80 | 51.80 | 61.80 | 55.60 | 57.20 | 51.90 | 47.70   | 30.80 | 77.10 | 63.25 | 65.40 | 51.95 | 46.15 | 29.35 |
| 0.6          | 45.05 | 39.40 | 49.15 | 43.45 | 45.10 | 39.15 | 30.80   | 19.30 | 62.95 | 49.85 | 51.65 | 37.70 | 31.30 | 20.30 |
| 0.65         | 33.45 | 29.40 | 37.35 | 32.45 | 33.20 | 29.40 | 19.40   | 12.10 | 48.35 | 35.65 | 38.25 | 26.30 | 22.30 | 13.80 |
| 0.7          | 23.15 | 21.30 | 25.95 | 24.30 | 23.25 | 21.25 | 11.85   | 8.90  | 34.40 | 24.65 | 25.20 | 18.25 | 15.85 | 10.50 |
| 0.75         | 16.05 | 15.90 | 18.65 | 17.60 | 15.90 | 15.25 | 8.30    | 6.55  | 22.45 | 15.90 | 15.85 | 12.35 | 12.60 | 9.45  |
| 0.8          | 10.80 | 11.00 | 12.95 | 13.20 | 10.65 | 11.35 | 6.30    | 6.25  | 14.10 | 10.15 | 9.80  | 8.25  | 10.20 | 9.25  |
| 0.85         | 7.00  | 7.60  | 8.90  | 9.10  | 7.40  | 7.70  | 5.60    | 6.85  | 9.35  | 7.20  | 6.80  | 6.35  | 10.15 | 9.65  |
| 0.9          | 5.55  | 5.70  | 6.55  | 6.95  | 5.55  | 5.40  | 5.85    | 8.05  | 6.80  | 5.10  | 5.30  | 4.65  | 10.20 | 11.45 |
| 0.95         | 4.75  | 4.75  | 5.65  | 5.50  | 4.70  | 4.80  | 7.10    | 8.75  | 5.45  | 5.10  | 5.70  | 4.70  | 12.00 | 12.55 |
| 1            | 4.40  | 4.55  | 5.45  | 5.25  | 4.50  | 4.50  | 8.70    | 10.15 | 5.90  | 5.75  | 6.60  | 5.70  | 13.65 | 14.05 |
| 1.05         | 4.85  | 4.25  | 5.80  | 5.05  | 4.75  | 4.35  | 10.55   | 12.05 | 7.65  | 6.90  | 7.90  | 6.75  | 16.20 | 15.55 |
| 1.1          | 6.00  | 4.70  | 7.50  | 5.30  | 5.90  | 4.75  | 13.05   | 15.10 | 10.25 | 9.00  | 9.85  | 8.75  | 18.80 | 17.95 |
| 1.15         | 7.35  | 5.20  | 9.10  | 6.20  | 7.30  | 5.00  | 16.40   | 17.50 | 12.90 | 11.80 | 13.05 | 10.95 | 22.25 | 20.55 |
| 1.2          | 9.15  | 6.30  | 11.00 | 7.80  | 9.10  | 6.20  | 19.80   | 19.70 | 16.55 | 15.10 | 15.85 | 14.45 | 25.60 | 23.80 |
| 1.25         | 11.25 | 8.00  | 12.95 | 9.45  | 10.95 | 7.90  | 23.50   | 21.75 | 21.15 | 18.30 | 19.65 | 16.90 | 29.20 | 27.20 |
| 1.3          | 13.40 | 9.85  | 15.75 | 11.40 | 13.30 | 9.45  | 26.55   | 24.55 | 27.55 | 22.85 | 24.05 | 19.65 | 33.45 | 29.80 |
| 1.35         | 16.60 | 11.25 | 18.85 | 13.50 | 16.35 | 11.75 | 32.20   | 26.80 | 32.80 | 26.20 | 28.65 | 23.15 | 38.30 | 32.55 |
| 1.4          | 19.15 | 13.55 | 21.35 | 15.65 | 19.20 | 13.55 | 35.20   | 30.00 | 38.25 | 31.00 | 33.20 | 26.60 | 42.05 | 36.00 |
| 1.45         | 22.20 | 15.65 | 25.85 | 18.55 | 21.95 | 15.65 | 39.35   | 32.20 | 44.15 | 34.95 | 38.35 | 30.70 | 46.55 | 38.95 |
| 1.5          | 26.35 | 17.80 | 29.30 | 21.05 | 26.20 | 17.90 | 44.65   | 34.55 | 50.25 | 39.60 | 42.05 | 34.35 | 51.80 | 42.15 |
| 1.55         | 30.00 | 20.85 | 34.25 | 23.35 | 30.00 | 20.70 | 48.55   | 38.40 | 56.10 | 44.65 | 46.85 | 37.55 | 55.70 | 45.55 |
| 1.6          | 34.50 | 23.25 | 38.45 | 25.90 | 34.35 | 23.40 | 53.15   | 40.50 | 60.90 | 48.50 | 51.90 | 41.55 | 60.60 | 49.15 |
| 1.65         | 38.70 | 26.25 | 42.55 | 28.95 | 39.00 | 25.45 | 56.90   | 44.30 | 66.15 | 52.50 | 56.00 | 44.95 | 64.95 | 52.30 |
| 1.7          | 43.15 | 28.75 | 47.15 | 31.85 | 43.25 | 28.85 | 62.05   | 47.70 | 70.00 | 55.70 | 60.45 | 48.85 | 69.00 | 55.25 |
| 1.75         | 47.80 | 31.50 | 51.80 | 35.15 | 47.40 | 31.45 | 65.60   | 50.55 | 73.95 | 60.60 | 63.75 | 52.10 | 72.00 | 59.10 |
| 1.8          | 51.80 | 34.40 | 55.95 | 37.90 | 51.80 | 34.30 | 69.55   | 53.85 | 78.50 | 64.10 | 67.50 | 54.45 | 75.95 | 61.65 |
| 1.85         | 56.25 | 37.10 | 59.65 | 40.45 | 55.70 | 37.15 | 72.90   | 56.95 | 81.85 | 67.20 | 71.45 | 57.60 | 79.05 | 64.50 |
| 1.9          | 60.10 | 39.50 | 63.55 | 42.50 | 59.80 | 39.30 | 75.65   | 59.20 | 84.60 | 70.05 | 74.50 | 60.35 | 81.70 | 67.15 |
| 1.95         | 63.75 | 41.95 | 67.15 | 45.40 | 63.90 | 41.65 | 78.20   | 61.30 | 86.95 | 73.10 | 78.20 | 62.95 | 84.20 | 69.50 |
| 2            | 67.00 | 44.40 | 70.35 | 48.65 | 67.50 | 44.80 | 81.35   | 64.20 | 89.05 | 75.55 | 81.70 | 65.50 | 86.50 | 72.00 |

3.3.1 Parallel hazard functions - Sample size  $n = 50$  - Significance  $\alpha = 0.05$  - Fixed length-scale 1

| rate<br>cens | MW1   |       | MW2   |       | MW3   |       | Pearson |       | LR1   |       | LR2   |       | WLR   |       |
|--------------|-------|-------|-------|-------|-------|-------|---------|-------|-------|-------|-------|-------|-------|-------|
|              | 30%   | 50%   | 30%   | 50%   | 30%   | 50%   | 30%     | 50%   | 30%   | 50%   | 30%   | 50%   | 30%   | 50%   |
| 0.5          | 93.65 | 89.70 | 94.15 | 90.80 | 93.80 | 89.70 | 89.70   | 75.80 | 97.70 | 94.45 | 94.35 | 88.20 | 88.90 | 74.95 |
| 0.55         | 85.55 | 79.30 | 87.55 | 81.25 | 86.15 | 79.25 | 77.05   | 58.85 | 94.15 | 85.95 | 87.35 | 76.15 | 76.00 | 57.00 |
| 0.6          | 73.10 | 65.45 | 76.15 | 67.85 | 73.85 | 65.40 | 60.25   | 41.55 | 84.30 | 71.95 | 74.60 | 59.70 | 59.50 | 39.85 |
| 0.65         | 59.40 | 51.45 | 62.30 | 54.00 | 59.90 | 51.30 | 42.75   | 26.70 | 70.05 | 57.70 | 59.60 | 44.45 | 40.75 | 26.40 |
| 0.7          | 44.75 | 38.80 | 47.70 | 41.05 | 44.05 | 38.65 | 27.35   | 16.65 | 54.50 | 40.90 | 42.25 | 31.90 | 27.20 | 17.20 |
| 0.75         | 32.40 | 28.25 | 34.70 | 30.40 | 32.30 | 28.05 | 16.55   | 10.75 | 37.30 | 27.30 | 28.80 | 21.05 | 17.85 | 12.40 |
| 0.8          | 21.20 | 18.70 | 23.95 | 20.45 | 21.25 | 18.85 | 11.00   | 7.90  | 24.15 | 17.50 | 18.05 | 13.35 | 12.65 | 9.00  |
| 0.85         | 14.25 | 12.60 | 15.80 | 14.30 | 14.20 | 12.55 | 7.20    | 6.85  | 14.95 | 11.05 | 12.05 | 8.25  | 9.80  | 7.70  |
| 0.9          | 9.00  | 8.25  | 10.30 | 9.25  | 8.80  | 8.60  | 5.50    | 6.60  | 9.55  | 7.25  | 7.10  | 5.75  | 9.50  | 8.20  |
| 0.95         | 6.40  | 6.20  | 7.20  | 6.95  | 6.25  | 6.20  | 6.30    | 7.80  | 6.35  | 5.85  | 5.75  | 5.05  | 10.10 | 9.20  |
| 1            | 5.50  | 5.55  | 6.20  | 6.50  | 5.75  | 5.70  | 8.15    | 9.30  | 6.10  | 5.90  | 5.80  | 5.10  | 11.85 | 10.90 |
| 1.05         | 6.05  | 6.15  | 7.15  | 6.85  | 6.10  | 6.05  | 10.10   | 10.95 | 8.05  | 7.30  | 6.80  | 6.75  | 14.30 | 12.85 |
| 1.1          | 8.25  | 6.80  | 9.45  | 8.05  | 8.15  | 6.75  | 13.10   | 13.90 | 11.90 | 9.70  | 9.65  | 8.90  | 17.60 | 16.20 |
| 1.15         | 11.95 | 9.45  | 13.30 | 10.75 | 11.70 | 9.50  | 16.25   | 16.50 | 16.60 | 13.75 | 13.95 | 11.85 | 21.85 | 19.60 |
| 1.2          | 16.20 | 12.45 | 18.30 | 13.65 | 16.35 | 12.60 | 20.95   | 20.05 | 23.75 | 18.55 | 18.90 | 15.35 | 26.80 | 22.35 |
| 1.25         | 22.50 | 16.40 | 24.35 | 17.95 | 22.20 | 16.40 | 27.55   | 23.75 | 30.35 | 23.90 | 25.30 | 19.75 | 32.30 | 26.05 |
| 1.3          | 28.80 | 20.75 | 31.25 | 22.95 | 28.95 | 20.80 | 32.45   | 28.30 | 37.20 | 29.75 | 31.60 | 24.85 | 37.85 | 30.15 |
| 1.35         | 35.40 | 26.20 | 37.85 | 28.80 | 35.30 | 26.15 | 38.65   | 32.05 | 44.90 | 36.35 | 38.00 | 29.50 | 44.20 | 35.85 |
| 1.4          | 42.00 | 31.50 | 45.85 | 34.60 | 42.30 | 31.60 | 46.05   | 36.40 | 53.95 | 41.85 | 43.70 | 35.95 | 49.70 | 40.75 |
| 1.45         | 50.55 | 36.65 | 53.25 | 39.35 | 50.75 | 36.50 | 51.50   | 39.55 | 61.35 | 48.15 | 50.20 | 40.50 | 56.05 | 44.55 |
| 1.5          | 58.05 | 42.55 | 60.80 | 45.40 | 58.00 | 42.65 | 57.40   | 44.70 | 68.60 | 54.20 | 57.55 | 45.00 | 61.30 | 50.05 |
| 1.55         | 64.85 | 48.15 | 67.45 | 50.85 | 64.60 | 47.90 | 62.70   | 49.65 | 74.30 | 59.75 | 63.05 | 50.85 | 67.45 | 55.65 |
| 1.6          | 70.80 | 53.75 | 73.25 | 56.70 | 70.90 | 53.75 | 68.30   | 54.65 | 78.90 | 65.85 | 68.60 | 55.20 | 72.65 | 60.20 |
| 1.65         | 75.95 | 58.75 | 77.70 | 61.60 | 76.10 | 58.75 | 72.85   | 58.65 | 83.40 | 70.90 | 73.60 | 59.25 | 77.60 | 64.60 |
| 1.7          | 80.55 | 63.55 | 82.05 | 66.40 | 80.30 | 63.35 | 77.60   | 62.95 | 87.10 | 75.00 | 77.90 | 63.70 | 82.05 | 68.95 |
| 1.75         | 83.55 | 67.90 | 84.95 | 71.30 | 83.55 | 68.45 | 82.05   | 66.30 | 90.10 | 78.70 | 81.95 | 67.00 | 85.90 | 72.40 |
| 1.8          | 86.90 | 73.05 | 88.90 | 74.95 | 86.90 | 72.55 | 85.60   | 70.00 | 92.55 | 81.95 | 85.00 | 70.55 | 88.60 | 76.00 |
| 1.85         | 90.05 | 76.10 | 91.30 | 77.80 | 90.15 | 75.70 | 88.40   | 73.05 | 94.55 | 84.65 | 87.75 | 74.55 | 90.10 | 79.10 |
| 1.9          | 92.30 | 78.80 | 93.10 | 80.70 | 92.10 | 78.75 | 91.10   | 76.65 | 95.80 | 87.35 | 90.20 | 78.10 | 92.55 | 81.65 |
| 1.95         | 93.80 | 81.90 | 94.65 | 84.20 | 93.70 | 82.00 | 92.70   | 79.35 | 97.10 | 89.05 | 92.15 | 80.75 | 94.20 | 84.65 |
| 2            | 95.10 | 84.20 | 95.95 | 86.10 | 95.20 | 84.30 | 94.35   | 81.90 | 98.05 | 90.45 | 93.70 | 83.40 | 95.50 | 86.40 |



### 3.4 Parallel hazard functions - Sample size $n = 50$ - Significance $\alpha = 0.05$ - Adaptive length-scale

| rate<br>cens | MW1   |       | MW2   |       | MW3   |       | Pearson |       | LR1   |       | LR2   |       | WLR   |       |
|--------------|-------|-------|-------|-------|-------|-------|---------|-------|-------|-------|-------|-------|-------|-------|
|              | 30%   | 50%   | 30%   | 50%   | 30%   | 50%   | 30%     | 50%   | 30%   | 50%   | 30%   | 50%   | 30%   | 50%   |
| 0.5          | 91.45 | 86.75 | 92.50 | 87.80 | 91.55 | 86.55 | 89.70   | 75.80 | 97.70 | 94.45 | 94.35 | 88.20 | 88.90 | 74.95 |
| 0.55         | 82.50 | 75.60 | 84.30 | 77.85 | 82.90 | 75.60 | 77.05   | 58.85 | 94.15 | 85.95 | 87.35 | 76.15 | 76.00 | 57.00 |
| 0.6          | 69.60 | 61.30 | 71.25 | 63.80 | 69.60 | 61.05 | 60.25   | 41.55 | 84.30 | 71.95 | 74.60 | 59.70 | 59.50 | 39.85 |
| 0.65         | 54.35 | 47.15 | 56.65 | 48.85 | 53.95 | 47.25 | 42.75   | 26.70 | 70.05 | 57.70 | 59.60 | 44.45 | 40.75 | 26.40 |
| 0.7          | 39.95 | 34.60 | 42.10 | 36.80 | 40.30 | 34.35 | 27.35   | 16.65 | 54.50 | 40.90 | 42.25 | 31.90 | 27.20 | 17.20 |
| 0.75         | 28.30 | 23.80 | 30.30 | 25.80 | 28.45 | 24.15 | 16.55   | 10.75 | 37.30 | 27.30 | 28.80 | 21.05 | 17.85 | 12.40 |
| 0.8          | 18.75 | 16.45 | 20.45 | 17.60 | 18.70 | 16.55 | 11.00   | 7.90  | 24.15 | 17.50 | 18.05 | 13.35 | 12.65 | 9.00  |
| 0.85         | 12.25 | 10.90 | 14.00 | 11.75 | 12.35 | 10.90 | 7.20    | 6.85  | 14.95 | 11.05 | 12.05 | 8.25  | 9.80  | 7.70  |
| 0.9          | 7.45  | 7.35  | 8.75  | 8.00  | 7.70  | 7.20  | 5.50    | 6.60  | 9.55  | 7.25  | 7.10  | 5.75  | 9.50  | 8.20  |
| 0.95         | 6.00  | 5.55  | 6.85  | 6.00  | 5.95  | 5.65  | 6.30    | 7.80  | 6.35  | 5.85  | 5.75  | 5.05  | 10.10 | 9.20  |
| 1            | 5.35  | 4.85  | 5.85  | 5.50  | 5.15  | 4.80  | 8.15    | 9.30  | 6.10  | 5.90  | 5.80  | 5.10  | 11.85 | 10.90 |
| 1.05         | 5.40  | 5.00  | 6.15  | 5.50  | 5.35  | 5.10  | 10.10   | 10.95 | 8.05  | 7.30  | 6.80  | 6.75  | 14.30 | 12.85 |
| 1.1          | 7.20  | 5.80  | 7.90  | 6.35  | 6.85  | 5.60  | 13.10   | 13.90 | 11.90 | 9.70  | 9.65  | 8.90  | 17.60 | 16.20 |
| 1.15         | 9.85  | 7.45  | 10.70 | 8.05  | 9.45  | 7.35  | 16.25   | 16.50 | 16.60 | 13.75 | 13.95 | 11.85 | 21.85 | 19.60 |
| 1.2          | 12.30 | 9.40  | 13.10 | 10.45 | 12.20 | 9.35  | 20.95   | 20.05 | 23.75 | 18.55 | 18.90 | 15.35 | 26.80 | 22.35 |
| 1.25         | 15.80 | 12.20 | 17.25 | 13.50 | 15.80 | 12.40 | 27.55   | 23.75 | 30.35 | 23.90 | 25.30 | 19.75 | 32.30 | 26.05 |
| 1.3          | 20.95 | 15.30 | 23.05 | 16.25 | 20.35 | 15.40 | 32.45   | 28.30 | 37.20 | 29.75 | 31.60 | 24.85 | 37.85 | 30.15 |
| 1.35         | 26.75 | 18.55 | 28.80 | 19.40 | 27.05 | 18.05 | 38.65   | 32.05 | 44.90 | 36.35 | 38.00 | 29.50 | 44.20 | 35.85 |
| 1.4          | 33.15 | 22.40 | 35.55 | 24.05 | 32.80 | 22.20 | 46.05   | 36.40 | 53.95 | 41.85 | 43.70 | 35.95 | 49.70 | 40.75 |
| 1.45         | 39.10 | 27.25 | 41.30 | 28.30 | 39.10 | 27.30 | 51.50   | 39.55 | 61.35 | 48.15 | 50.20 | 40.50 | 56.05 | 44.55 |
| 1.5          | 45.65 | 31.40 | 47.95 | 33.20 | 45.25 | 31.20 | 57.40   | 44.70 | 68.60 | 54.20 | 57.55 | 45.00 | 61.30 | 50.05 |
| 1.55         | 51.50 | 36.20 | 53.80 | 38.40 | 51.45 | 36.05 | 62.70   | 49.65 | 74.30 | 59.75 | 63.05 | 50.85 | 67.45 | 55.65 |
| 1.6          | 58.40 | 41.15 | 60.25 | 43.25 | 57.85 | 40.80 | 68.30   | 54.65 | 78.90 | 65.85 | 68.60 | 55.20 | 72.65 | 60.20 |
| 1.65         | 63.75 | 45.25 | 65.50 | 47.35 | 63.25 | 45.80 | 72.85   | 58.65 | 83.40 | 70.90 | 73.60 | 59.25 | 77.60 | 64.60 |
| 1.7          | 69.10 | 49.80 | 71.55 | 51.65 | 68.95 | 49.45 | 77.60   | 62.95 | 87.10 | 75.00 | 77.90 | 63.70 | 82.05 | 68.95 |
| 1.75         | 74.55 | 54.45 | 76.05 | 56.65 | 73.95 | 54.65 | 82.05   | 66.30 | 90.10 | 78.70 | 81.95 | 67.00 | 85.90 | 72.40 |
| 1.8          | 78.55 | 59.50 | 80.05 | 60.95 | 78.15 | 59.15 | 85.60   | 70.00 | 92.55 | 81.95 | 85.00 | 70.55 | 88.60 | 76.00 |
| 1.85         | 81.55 | 62.95 | 82.60 | 64.70 | 81.85 | 62.95 | 88.40   | 73.05 | 94.55 | 84.65 | 87.75 | 74.55 | 90.10 | 79.10 |
| 1.9          | 84.40 | 66.80 | 85.30 | 68.30 | 84.45 | 66.90 | 91.10   | 76.65 | 95.80 | 87.35 | 90.20 | 78.10 | 92.55 | 81.65 |
| 1.95         | 86.65 | 69.95 | 87.60 | 71.45 | 86.45 | 69.90 | 92.70   | 79.35 | 97.10 | 89.05 | 92.15 | 80.75 | 94.20 | 84.65 |
| 2            | 89.40 | 73.05 | 90.65 | 74.30 | 89.30 | 72.60 | 94.35   | 81.90 | 98.05 | 90.45 | 93.70 | 83.40 | 95.50 | 86.40 |

### 3.5 Parallel hazard functions - Sample size $n = 100$ - Significance $\alpha = 0.05$ - Fixed length-scale 1

| rate<br>cens | MW1   |       | MW2   |       | MW3   |       | Pearson |       | LR1    |       | LR2   |       | WLR   |       |
|--------------|-------|-------|-------|-------|-------|-------|---------|-------|--------|-------|-------|-------|-------|-------|
|              | 30%   | 50%   | 30%   | 50%   | 30%   | 50%   | 30%     | 50%   | 30%    | 50%   | 30%   | 50%   | 30%   | 50%   |
| 0.5          | 99.90 | 99.40 | 99.90 | 99.55 | 99.80 | 99.45 | 99.85   | 98.45 | 100.00 | 99.85 | 99.90 | 99.35 | 99.80 | 98.60 |
| 0.55         | 99.00 | 97.65 | 98.95 | 97.85 | 98.85 | 97.75 | 98.35   | 93.70 | 99.80  | 99.30 | 99.15 | 96.85 | 98.65 | 94.40 |
| 0.6          | 95.70 | 91.90 | 96.00 | 92.40 | 95.65 | 91.90 | 93.85   | 82.35 | 98.70  | 95.70 | 96.15 | 89.15 | 92.80 | 82.00 |
| 0.65         | 87.35 | 81.15 | 88.35 | 81.75 | 87.50 | 81.35 | 81.50   | 64.65 | 94.35  | 87.30 | 87.05 | 76.30 | 79.95 | 62.30 |
| 0.7          | 74.60 | 66.10 | 75.55 | 67.80 | 74.35 | 66.10 | 60.65   | 43.10 | 83.90  | 71.65 | 73.70 | 60.40 | 59.10 | 42.70 |
| 0.75         | 57.20 | 48.75 | 58.45 | 50.75 | 56.95 | 48.95 | 39.10   | 25.85 | 66.60  | 52.40 | 54.35 | 40.90 | 37.10 | 25.20 |
| 0.8          | 38.80 | 32.25 | 40.15 | 33.65 | 38.50 | 32.10 | 22.35   | 14.80 | 44.85  | 33.40 | 35.00 | 25.45 | 21.60 | 15.50 |
| 0.85         | 22.90 | 19.30 | 24.35 | 20.15 | 23.00 | 19.45 | 11.80   | 8.60  | 25.70  | 18.70 | 19.90 | 14.75 | 11.80 | 9.90  |
| 0.9          | 12.95 | 11.40 | 13.75 | 12.15 | 13.05 | 11.40 | 7.40    | 6.20  | 13.95  | 10.95 | 11.40 | 9.25  | 8.15  | 7.50  |
| 0.95         | 7.45  | 7.90  | 7.95  | 8.10  | 7.90  | 7.90  | 5.80    | 6.25  | 6.70   | 7.15  | 6.60  | 6.40  | 6.95  | 6.90  |
| 1            | 5.90  | 6.15  | 6.10  | 6.35  | 5.75  | 6.00  | 6.40    | 8.70  | 5.85   | 5.85  | 6.00  | 5.80  | 8.40  | 8.25  |
| 1.05         | 7.05  | 6.90  | 7.75  | 7.45  | 7.00  | 6.85  | 9.20    | 9.80  | 8.65   | 7.95  | 8.05  | 7.85  | 10.40 | 11.30 |
| 1.1          | 11.45 | 9.80  | 12.35 | 10.25 | 11.65 | 9.70  | 13.05   | 12.95 | 14.95  | 12.45 | 13.45 | 11.90 | 15.30 | 15.30 |
| 1.15         | 19.05 | 14.65 | 19.60 | 15.55 | 18.70 | 14.80 | 18.60   | 18.05 | 23.90  | 19.30 | 20.55 | 16.95 | 22.05 | 20.10 |
| 1.2          | 28.15 | 21.00 | 29.15 | 22.00 | 28.00 | 21.10 | 26.60   | 23.95 | 35.10  | 27.65 | 28.60 | 23.05 | 30.80 | 26.10 |
| 1.25         | 39.95 | 29.10 | 41.15 | 30.40 | 39.50 | 29.00 | 36.15   | 32.25 | 48.50  | 36.60 | 38.40 | 30.15 | 39.35 | 33.00 |
| 1.3          | 50.45 | 37.70 | 52.70 | 39.10 | 50.95 | 37.70 | 46.80   | 40.05 | 60.65  | 47.15 | 49.05 | 38.70 | 50.00 | 41.15 |
| 1.35         | 63.30 | 47.45 | 64.50 | 49.45 | 63.05 | 47.05 | 56.90   | 47.80 | 71.90  | 56.35 | 59.05 | 46.40 | 59.65 | 48.20 |
| 1.4          | 72.60 | 57.05 | 73.95 | 58.90 | 72.40 | 57.35 | 66.45   | 55.05 | 79.70  | 66.45 | 69.30 | 54.70 | 68.20 | 55.90 |
| 1.45         | 80.35 | 66.30 | 81.40 | 66.90 | 80.40 | 66.20 | 75.00   | 62.30 | 86.35  | 73.90 | 76.45 | 62.10 | 77.20 | 63.95 |
| 1.5          | 86.00 | 73.70 | 87.15 | 74.65 | 86.05 | 73.45 | 82.45   | 69.55 | 91.45  | 81.65 | 83.25 | 68.45 | 83.35 | 70.30 |
| 1.55         | 90.20 | 80.10 | 90.95 | 81.45 | 90.50 | 80.05 | 87.90   | 74.45 | 95.00  | 86.30 | 87.60 | 75.20 | 89.10 | 76.50 |
| 1.6          | 94.30 | 84.55 | 94.70 | 85.40 | 94.15 | 84.60 | 91.05   | 79.90 | 96.75  | 88.75 | 91.35 | 80.65 | 92.05 | 82.20 |
| 1.65         | 96.70 | 88.35 | 97.10 | 89.05 | 96.65 | 88.30 | 94.75   | 83.75 | 98.20  | 91.65 | 93.90 | 84.65 | 94.95 | 85.85 |
| 1.7          | 98.00 | 90.60 | 98.20 | 91.50 | 98.10 | 90.80 | 96.35   | 87.30 | 99.25  | 94.20 | 95.80 | 88.25 | 96.75 | 88.95 |
| 1.75         | 98.75 | 93.20 | 98.95 | 93.60 | 98.75 | 93.35 | 98.15   | 89.80 | 99.45  | 96.05 | 97.50 | 90.40 | 97.90 | 91.95 |
| 1.8          | 99.25 | 94.85 | 99.25 | 95.30 | 99.30 | 94.90 | 98.75   | 92.55 | 99.65  | 96.80 | 98.25 | 92.40 | 98.90 | 93.35 |
| 1.85         | 99.50 | 96.40 | 99.50 | 96.70 | 99.50 | 96.55 | 99.20   | 94.45 | 99.75  | 97.85 | 98.75 | 93.95 | 99.30 | 95.15 |
| 1.9          | 99.70 | 97.25 | 99.75 | 97.70 | 99.75 | 97.40 | 99.45   | 95.80 | 99.90  | 98.65 | 99.40 | 95.35 | 99.60 | 96.15 |
| 1.95         | 99.85 | 98.15 | 99.95 | 98.25 | 99.85 | 98.15 | 99.60   | 97.20 | 99.95  | 99.10 | 99.50 | 96.50 | 99.65 | 97.35 |
| 2            | 99.95 | 98.65 | 99.95 | 98.85 | 99.95 | 98.75 | 99.70   | 97.95 | 99.95  | 99.25 | 99.80 | 97.25 | 99.85 | 98.20 |

### 3.6 Parallel hazard functions - Sample size $n = 100$ - Significance $\alpha = 0.05$ - Adaptive length-scale

| rate<br>cens | MW1   |       | MW2   |       | MW3   |       | Pearson |       | LR1    |       | LR2   |       | WLR   |       |
|--------------|-------|-------|-------|-------|-------|-------|---------|-------|--------|-------|-------|-------|-------|-------|
|              | 30%   | 50%   | 30%   | 50%   | 30%   | 50%   | 30%     | 50%   | 30%    | 50%   | 30%   | 50%   | 30%   | 50%   |
| 0.5          | 99.60 | 99.40 | 99.60 | 99.50 | 99.60 | 99.40 | 99.85   | 98.45 | 100.00 | 99.85 | 99.90 | 99.35 | 99.80 | 98.60 |
| 0.55         | 98.60 | 96.45 | 98.90 | 96.70 | 98.65 | 96.25 | 98.35   | 93.70 | 99.80  | 99.30 | 99.15 | 96.85 | 98.65 | 94.40 |
| 0.6          | 94.65 | 89.35 | 94.90 | 89.80 | 94.70 | 89.50 | 93.85   | 82.35 | 98.70  | 95.70 | 96.15 | 89.15 | 92.80 | 82.00 |
| 0.65         | 85.30 | 77.30 | 85.80 | 77.95 | 85.05 | 77.00 | 81.50   | 64.65 | 94.35  | 87.30 | 87.05 | 76.30 | 79.95 | 62.30 |
| 0.7          | 69.75 | 61.00 | 70.70 | 61.90 | 69.75 | 61.25 | 60.65   | 43.10 | 83.90  | 71.65 | 73.70 | 60.40 | 59.10 | 42.70 |
| 0.75         | 51.15 | 43.05 | 52.20 | 44.50 | 51.05 | 43.00 | 39.10   | 25.85 | 66.60  | 52.40 | 54.35 | 40.90 | 37.10 | 25.20 |
| 0.8          | 32.70 | 27.75 | 33.50 | 28.25 | 32.30 | 27.50 | 22.35   | 14.80 | 44.85  | 33.40 | 35.00 | 25.45 | 21.60 | 15.50 |
| 0.85         | 19.20 | 16.20 | 20.05 | 17.05 | 19.40 | 16.25 | 11.80   | 8.60  | 25.70  | 18.70 | 19.90 | 14.75 | 11.80 | 9.90  |
| 0.9          | 11.20 | 10.40 | 11.95 | 10.60 | 11.20 | 10.25 | 7.40    | 6.20  | 13.95  | 10.95 | 11.40 | 9.25  | 8.15  | 7.50  |
| 0.95         | 7.05  | 7.00  | 7.35  | 7.45  | 7.20  | 7.45  | 5.80    | 6.25  | 6.70   | 7.15  | 6.60  | 6.40  | 6.95  | 6.90  |
| 1            | 5.50  | 5.40  | 5.45  | 5.60  | 5.50  | 5.25  | 6.40    | 8.70  | 5.85   | 5.85  | 6.00  | 5.80  | 8.40  | 8.25  |
| 1.05         | 5.80  | 6.20  | 6.45  | 6.35  | 6.40  | 5.75  | 9.20    | 9.80  | 8.65   | 7.95  | 8.05  | 7.85  | 10.40 | 11.30 |
| 1.1          | 9.70  | 8.80  | 10.00 | 9.15  | 9.45  | 8.35  | 13.05   | 12.95 | 14.95  | 12.45 | 13.45 | 11.90 | 15.30 | 15.30 |
| 1.15         | 14.65 | 12.10 | 15.55 | 12.50 | 14.80 | 11.85 | 18.60   | 18.05 | 23.90  | 19.30 | 20.55 | 16.95 | 22.05 | 20.10 |
| 1.2          | 22.35 | 17.25 | 23.15 | 17.40 | 21.90 | 16.65 | 26.60   | 23.95 | 35.10  | 27.65 | 28.60 | 23.05 | 30.80 | 26.10 |
| 1.25         | 31.15 | 23.20 | 32.55 | 24.55 | 30.75 | 23.30 | 36.15   | 32.25 | 48.50  | 36.60 | 38.40 | 30.15 | 39.35 | 33.00 |
| 1.3          | 41.95 | 30.90 | 43.30 | 31.70 | 42.05 | 30.65 | 46.80   | 40.05 | 60.65  | 47.15 | 49.05 | 38.70 | 50.00 | 41.15 |
| 1.35         | 52.10 | 38.80 | 53.50 | 39.90 | 51.70 | 38.85 | 56.90   | 47.80 | 71.90  | 56.35 | 59.05 | 46.40 | 59.65 | 48.20 |
| 1.4          | 61.35 | 46.85 | 62.60 | 48.10 | 61.70 | 47.20 | 66.45   | 55.05 | 79.70  | 66.45 | 69.30 | 54.70 | 68.20 | 55.90 |
| 1.45         | 71.15 | 54.80 | 72.20 | 55.60 | 71.10 | 54.30 | 75.00   | 62.30 | 86.35  | 73.90 | 76.45 | 62.10 | 77.20 | 63.95 |
| 1.5          | 78.70 | 63.45 | 79.85 | 63.95 | 78.85 | 63.25 | 82.45   | 69.55 | 91.45  | 81.65 | 83.25 | 68.45 | 83.35 | 70.30 |
| 1.55         | 84.85 | 70.05 | 85.15 | 69.95 | 84.50 | 70.05 | 87.90   | 74.45 | 95.00  | 86.30 | 87.60 | 75.20 | 89.10 | 76.50 |
| 1.6          | 89.70 | 75.20 | 90.15 | 76.05 | 89.80 | 75.45 | 91.05   | 79.90 | 96.75  | 88.75 | 91.35 | 80.65 | 92.05 | 82.20 |
| 1.65         | 92.85 | 80.20 | 93.35 | 80.70 | 93.00 | 80.45 | 94.75   | 83.75 | 98.20  | 91.65 | 93.90 | 84.65 | 94.95 | 85.85 |
| 1.7          | 95.50 | 84.50 | 95.80 | 85.30 | 95.70 | 84.75 | 96.35   | 87.30 | 99.25  | 94.20 | 95.80 | 88.25 | 96.75 | 88.95 |
| 1.75         | 97.20 | 88.20 | 97.15 | 88.50 | 97.05 | 88.10 | 98.15   | 89.80 | 99.45  | 96.05 | 97.50 | 90.40 | 97.90 | 91.95 |
| 1.8          | 98.15 | 91.00 | 98.20 | 91.35 | 98.30 | 90.90 | 98.75   | 92.55 | 99.65  | 96.80 | 98.25 | 92.40 | 98.90 | 93.35 |
| 1.85         | 98.90 | 93.20 | 98.85 | 93.30 | 98.85 | 93.05 | 99.20   | 94.45 | 99.75  | 97.85 | 98.75 | 93.95 | 99.30 | 95.15 |
| 1.9          | 99.15 | 94.60 | 99.30 | 94.75 | 99.20 | 94.70 | 99.45   | 95.80 | 99.90  | 98.65 | 99.40 | 95.35 | 99.60 | 96.15 |
| 1.95         | 99.45 | 95.70 | 99.50 | 95.85 | 99.50 | 95.85 | 99.60   | 97.20 | 99.95  | 99.10 | 99.50 | 96.50 | 99.65 | 97.35 |
| 2            | 99.65 | 96.75 | 99.65 | 96.75 | 99.60 | 96.55 | 99.70   | 97.95 | 99.95  | 99.25 | 99.80 | 97.25 | 99.85 | 98.20 |

### 3.7 Parallel hazard functions - Sample size $n = 200$ - Significance $\alpha = 0.05$ - Fixed length-scale 1

| rate<br>cens | MW1    |        | MW2    |        | MW3    |        | Pearson |        | LR1    |        | LR2    |        | WLR    |        |
|--------------|--------|--------|--------|--------|--------|--------|---------|--------|--------|--------|--------|--------|--------|--------|
|              | 30%    | 50%    | 30%    | 50%    | 30%    | 50%    | 30%     | 50%    | 30%    | 50%    | 30%    | 50%    | 30%    | 50%    |
| 0.5          | 100.00 | 100.00 | 100.00 | 100.00 | 100.00 | 100.00 | 100.00  | 100.00 | 100.00 | 100.00 | 100.00 | 100.00 | 100.00 | 100.00 |
| 0.55         | 100.00 | 99.95  | 100.00 | 99.95  | 100.00 | 99.95  | 100.00  | 99.90  | 100.00 | 99.95  | 100.00 | 99.95  | 100.00 | 99.90  |
| 0.6          | 99.90  | 99.65  | 99.90  | 99.65  | 99.90  | 99.60  | 99.90   | 99.45  | 99.90  | 99.85  | 99.95  | 99.55  | 99.90  | 99.35  |
| 0.65         | 99.30  | 98.10  | 99.35  | 98.30  | 99.35  | 98.25  | 99.05   | 95.20  | 99.85  | 99.40  | 99.30  | 96.80  | 99.00  | 94.35  |
| 0.7          | 96.25  | 91.80  | 96.10  | 91.95  | 96.20  | 91.30  | 93.35   | 80.80  | 98.85  | 95.40  | 95.80  | 88.10  | 93.55  | 80.90  |
| 0.75         | 85.90  | 77.30  | 86.50  | 78.10  | 86.30  | 77.40  | 74.85   | 54.85  | 93.00  | 82.90  | 84.45  | 70.75  | 73.55  | 55.90  |
| 0.8          | 64.45  | 54.30  | 65.25  | 55.25  | 64.35  | 54.35  | 47.50   | 31.95  | 74.35  | 58.50  | 60.90  | 47.10  | 45.50  | 32.30  |
| 0.85         | 39.80  | 32.45  | 40.80  | 32.85  | 39.85  | 32.50  | 22.95   | 16.50  | 46.15  | 33.10  | 36.75  | 27.65  | 23.55  | 17.00  |
| 0.9          | 19.60  | 17.60  | 20.10  | 17.85  | 19.65  | 17.60  | 10.20   | 7.20   | 21.50  | 17.35  | 17.60  | 14.05  | 10.15  | 9.25   |
| 0.95         | 8.90   | 8.75   | 9.05   | 9.05   | 8.80   | 8.95   | 5.20    | 4.55   | 8.30   | 7.80   | 7.50   | 7.15   | 6.10   | 6.70   |
| 1            | 4.90   | 5.05   | 4.85   | 5.10   | 4.75   | 5.00   | 5.65    | 5.50   | 5.10   | 4.75   | 5.10   | 5.50   | 6.85   | 7.30   |
| 1.05         | 7.15   | 7.45   | 7.55   | 7.35   | 7.60   | 7.40   | 7.65    | 7.80   | 9.20   | 9.20   | 7.95   | 8.30   | 10.55  | 10.65  |
| 1.1          | 17.20  | 14.20  | 17.55  | 14.15  | 17.00  | 13.60  | 14.70   | 14.00  | 21.75  | 17.20  | 17.95  | 14.45  | 17.70  | 17.00  |
| 1.15         | 33.35  | 25.05  | 33.65  | 25.90  | 33.10  | 25.20  | 26.80   | 23.10  | 39.90  | 31.40  | 32.55  | 24.55  | 29.35  | 25.30  |
| 1.2          | 50.80  | 40.05  | 51.30  | 40.45  | 50.55  | 40.00  | 42.65   | 34.85  | 60.10  | 47.85  | 48.15  | 37.80  | 45.35  | 37.65  |
| 1.25         | 68.65  | 55.35  | 68.90  | 55.90  | 68.20  | 54.90  | 58.80   | 47.90  | 76.30  | 63.60  | 63.70  | 51.15  | 62.55  | 49.90  |
| 1.3          | 81.65  | 68.60  | 81.85  | 69.35  | 82.15  | 69.25  | 73.20   | 60.75  | 87.75  | 75.60  | 77.25  | 63.25  | 75.55  | 62.55  |
| 1.35         | 90.80  | 79.50  | 90.95  | 79.85  | 90.90  | 79.50  | 85.55   | 72.05  | 94.85  | 83.60  | 86.80  | 73.05  | 85.90  | 72.20  |
| 1.4          | 95.65  | 86.40  | 95.65  | 86.55  | 95.65  | 86.25  | 91.80   | 80.90  | 97.80  | 90.05  | 92.75  | 81.55  | 92.60  | 81.10  |
| 1.45         | 98.15  | 91.40  | 98.20  | 91.40  | 98.20  | 91.40  | 96.05   | 87.95  | 99.15  | 94.70  | 96.95  | 87.65  | 96.35  | 87.30  |
| 1.5          | 99.50  | 95.85  | 99.35  | 95.55  | 99.30  | 95.80  | 98.50   | 92.10  | 99.80  | 97.85  | 98.35  | 91.70  | 98.45  | 92.25  |
| 1.55         | 99.70  | 97.95  | 99.80  | 98.05  | 99.75  | 97.75  | 99.55   | 95.50  | 99.90  | 98.85  | 99.25  | 95.20  | 99.30  | 96.10  |
| 1.6          | 99.95  | 98.90  | 99.95  | 98.90  | 99.95  | 98.95  | 99.70   | 97.70  | 99.95  | 99.40  | 99.75  | 97.50  | 99.90  | 97.80  |
| 1.65         | 99.95  | 99.55  | 99.95  | 99.55  | 99.95  | 99.50  | 99.85   | 98.80  | 100.00 | 99.85  | 99.90  | 98.65  | 99.90  | 99.05  |
| 1.7          | 100.00 | 99.75  | 100.00 | 99.85  | 100.00 | 99.80  | 99.90   | 99.45  | 100.00 | 99.90  | 99.95  | 99.20  | 100.00 | 99.65  |
| 1.75         | 100.00 | 99.90  | 100.00 | 99.90  | 100.00 | 99.90  | 100.00  | 99.75  | 100.00 | 99.95  | 99.95  | 99.60  | 100.00 | 99.70  |
| 1.8          | 100.00 | 99.95  | 100.00 | 99.95  | 100.00 | 99.95  | 100.00  | 99.90  | 100.00 | 100.00 | 100.00 | 99.70  | 100.00 | 99.85  |
| 1.85         | 100.00 | 100.00 | 100.00 | 100.00 | 100.00 | 100.00 | 100.00  | 99.90  | 100.00 | 100.00 | 100.00 | 99.90  | 100.00 | 99.90  |
| 1.9          | 100.00 | 100.00 | 100.00 | 100.00 | 100.00 | 100.00 | 100.00  | 99.95  | 100.00 | 100.00 | 100.00 | 99.95  | 100.00 | 99.90  |
| 1.95         | 100.00 | 100.00 | 100.00 | 100.00 | 100.00 | 100.00 | 100.00  | 99.95  | 100.00 | 100.00 | 100.00 | 100.00 | 100.00 | 99.95  |
| 2            | 100.00 | 100.00 | 100.00 | 100.00 | 100.00 | 100.00 | 100.00  | 100.00 | 100.00 | 100.00 | 100.00 | 100.00 | 100.00 | 100.00 |

### 3.8 Parallel hazard functions - Sample size $n = 200$ - Significance $\alpha = 0.05$ - Adaptive length-scale

| rate<br>cens | MW1    |        | MW2    |        | MW3    |        | Pearson |        | LR1    |        | LR2    |        | WLR    |        |
|--------------|--------|--------|--------|--------|--------|--------|---------|--------|--------|--------|--------|--------|--------|--------|
|              | 30%    | 50%    | 30%    | 50%    | 30%    | 50%    | 30%     | 50%    | 30%    | 50%    | 30%    | 50%    | 30%    | 50%    |
| 0.5          | 100.00 | 100.00 | 100.00 | 100.00 | 100.00 | 100.00 | 100.00  | 100.00 | 100.00 | 100.00 | 100.00 | 100.00 | 100.00 | 100.00 |
| 0.55         | 100.00 | 99.95  | 100.00 | 99.95  | 99.95  | 99.95  | 100.00  | 99.90  | 100.00 | 99.95  | 100.00 | 99.95  | 100.00 | 99.90  |
| 0.6          | 99.90  | 99.65  | 99.90  | 99.65  | 99.90  | 99.55  | 99.90   | 99.45  | 99.90  | 99.85  | 99.95  | 99.55  | 99.90  | 99.35  |
| 0.65         | 99.05  | 97.05  | 99.15  | 97.00  | 99.10  | 97.05  | 99.05   | 95.20  | 99.85  | 99.40  | 99.30  | 96.80  | 99.00  | 94.35  |
| 0.7          | 94.60  | 89.05  | 94.65  | 89.40  | 94.70  | 89.05  | 93.35   | 80.80  | 98.85  | 95.40  | 95.80  | 88.10  | 93.55  | 80.90  |
| 0.75         | 81.60  | 71.85  | 81.65  | 72.70  | 81.70  | 71.75  | 74.85   | 54.85  | 93.00  | 82.90  | 84.45  | 70.75  | 73.55  | 55.90  |
| 0.8          | 58.60  | 48.25  | 59.25  | 48.70  | 58.15  | 47.80  | 47.50   | 31.95  | 74.35  | 58.50  | 60.90  | 47.10  | 45.50  | 32.30  |
| 0.85         | 33.35  | 29.10  | 34.15  | 29.60  | 33.45  | 29.15  | 22.95   | 16.50  | 46.15  | 33.10  | 36.75  | 27.65  | 23.55  | 17.00  |
| 0.9          | 15.95  | 15.45  | 16.55  | 15.80  | 15.85  | 15.05  | 10.20   | 7.20   | 21.50  | 17.35  | 17.60  | 14.05  | 10.15  | 9.25   |
| 0.95         | 7.50   | 7.60   | 7.70   | 7.60   | 7.70   | 7.40   | 5.20    | 4.55   | 8.30   | 7.80   | 7.50   | 7.15   | 6.10   | 6.70   |
| 1            | 4.95   | 5.05   | 4.60   | 5.10   | 4.55   | 5.00   | 5.65    | 5.50   | 5.10   | 4.75   | 5.10   | 5.50   | 6.85   | 7.30   |
| 1.05         | 6.10   | 6.20   | 6.35   | 6.35   | 6.40   | 6.30   | 7.65    | 7.80   | 9.20   | 9.20   | 7.95   | 8.30   | 10.55  | 10.65  |
| 1.1          | 12.80  | 11.35  | 13.10  | 11.60  | 13.10  | 11.30  | 14.70   | 14.00  | 21.75  | 17.20  | 17.95  | 14.45  | 17.70  | 17.00  |
| 1.15         | 25.80  | 18.80  | 26.05  | 19.50  | 25.65  | 19.05  | 26.80   | 23.10  | 39.90  | 31.40  | 32.55  | 24.55  | 29.35  | 25.30  |
| 1.2          | 41.50  | 31.20  | 41.65  | 32.15  | 41.20  | 31.00  | 42.65   | 34.85  | 60.10  | 47.85  | 48.15  | 37.80  | 45.35  | 37.65  |
| 1.25         | 58.10  | 45.00  | 58.35  | 45.60  | 57.65  | 44.95  | 58.80   | 47.90  | 76.30  | 63.60  | 63.70  | 51.15  | 62.55  | 49.90  |
| 1.3          | 73.15  | 59.35  | 73.80  | 59.05  | 73.85  | 59.35  | 73.20   | 60.75  | 87.75  | 75.60  | 77.25  | 63.25  | 75.55  | 62.55  |
| 1.35         | 84.45  | 71.15  | 85.00  | 71.70  | 84.70  | 71.35  | 85.55   | 72.05  | 94.85  | 83.60  | 86.80  | 73.05  | 85.90  | 72.20  |
| 1.4          | 91.90  | 79.75  | 92.10  | 79.95  | 91.85  | 79.90  | 91.80   | 80.90  | 97.80  | 90.05  | 92.75  | 81.55  | 92.60  | 81.10  |
| 1.45         | 96.00  | 85.95  | 96.25  | 86.05  | 96.00  | 86.30  | 96.05   | 87.95  | 99.15  | 94.70  | 96.95  | 87.65  | 96.35  | 87.30  |
| 1.5          | 97.95  | 90.70  | 98.00  | 90.75  | 98.00  | 90.60  | 98.50   | 92.10  | 99.80  | 97.85  | 98.35  | 91.70  | 98.45  | 92.25  |
| 1.55         | 99.25  | 94.80  | 99.30  | 94.80  | 99.25  | 94.85  | 99.55   | 95.50  | 99.90  | 98.85  | 99.25  | 95.20  | 99.30  | 96.10  |
| 1.6          | 99.65  | 97.20  | 99.70  | 97.20  | 99.65  | 97.25  | 99.70   | 97.70  | 99.95  | 99.40  | 99.75  | 97.50  | 99.90  | 97.80  |
| 1.65         | 99.90  | 98.50  | 99.90  | 98.55  | 99.90  | 98.50  | 99.85   | 98.80  | 100.00 | 99.85  | 99.90  | 98.65  | 99.90  | 99.05  |
| 1.7          | 99.90  | 99.35  | 99.95  | 99.25  | 99.95  | 99.40  | 99.90   | 99.45  | 100.00 | 99.90  | 99.95  | 99.20  | 100.00 | 99.65  |
| 1.75         | 100.00 | 99.65  | 100.00 | 99.70  | 100.00 | 99.70  | 100.00  | 99.75  | 100.00 | 99.95  | 99.95  | 99.60  | 100.00 | 99.70  |
| 1.8          | 100.00 | 99.90  | 100.00 | 99.95  | 100.00 | 99.95  | 100.00  | 99.90  | 100.00 | 100.00 | 100.00 | 99.70  | 100.00 | 99.85  |
| 1.85         | 100.00 | 99.95  | 100.00 | 99.95  | 100.00 | 99.95  | 100.00  | 99.90  | 100.00 | 100.00 | 100.00 | 99.90  | 100.00 | 99.90  |
| 1.9          | 100.00 | 100.00 | 100.00 | 100.00 | 100.00 | 100.00 | 100.00  | 99.95  | 100.00 | 100.00 | 100.00 | 99.95  | 100.00 | 99.90  |
| 1.95         | 100.00 | 100.00 | 100.00 | 100.00 | 100.00 | 100.00 | 100.00  | 99.95  | 100.00 | 100.00 | 100.00 | 100.00 | 100.00 | 99.95  |
| 2            | 100.00 | 100.00 | 100.00 | 100.00 | 100.00 | 100.00 | 100.00  | 100.00 | 100.00 | 100.00 | 100.00 | 100.00 | 100.00 | 100.00 |

## 4 Periodic hazard functions

Let  $\theta = (\theta_1, \theta_2)$  such that  $\theta_2 < 1$  and  $\theta_1 \in \mathbb{R}$ . We consider the family of hazard functions  $\lambda_\theta(t) = 1 - \theta_2 \cos(\theta_1 \pi t)$  for fixed  $\theta_2 = 1$  and  $\theta_1 \in \{0.5, 0.7, 0.9, 1, 1.5, 3\}$ . We include plots of the hazard function, distribution function and distribution of the transformed data  $U = F_0(X)$  for each combination of alternative and null hypothesis. The null hypothesis, shown in the plots in color pink, is denoted by  $F_0(t) = 1 - e^{-t}$  and  $\lambda_0(t) = 1$ .

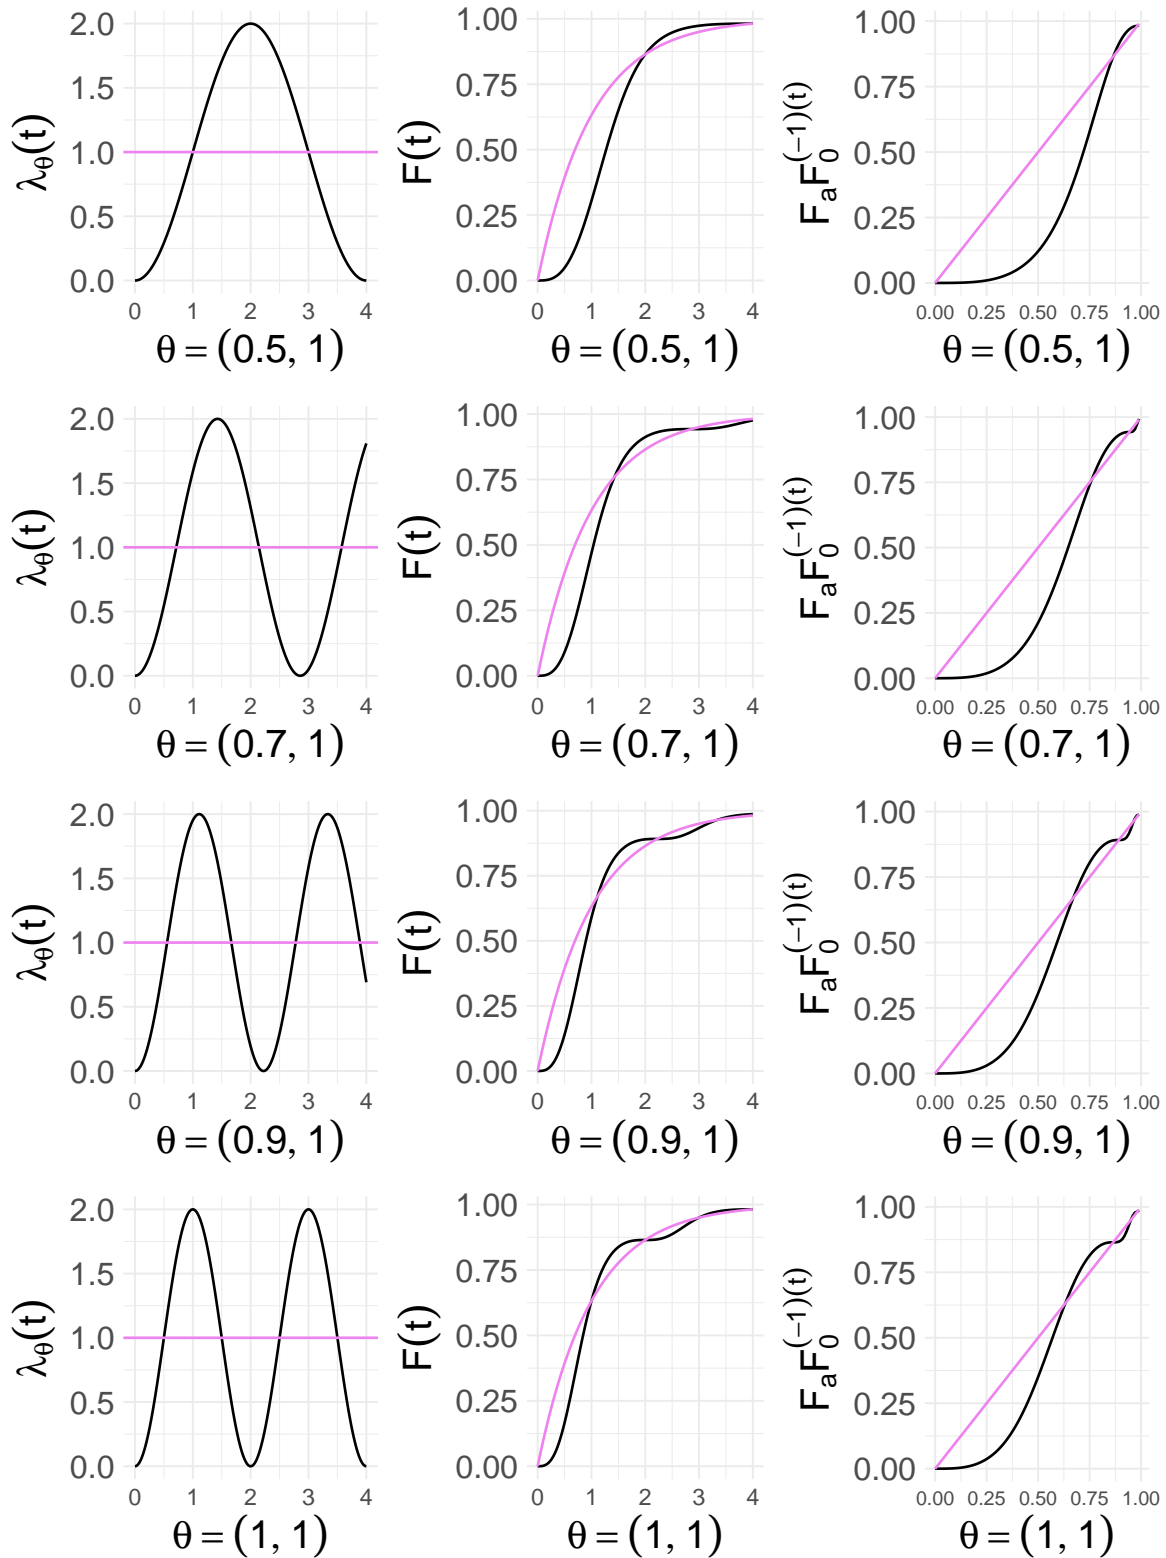

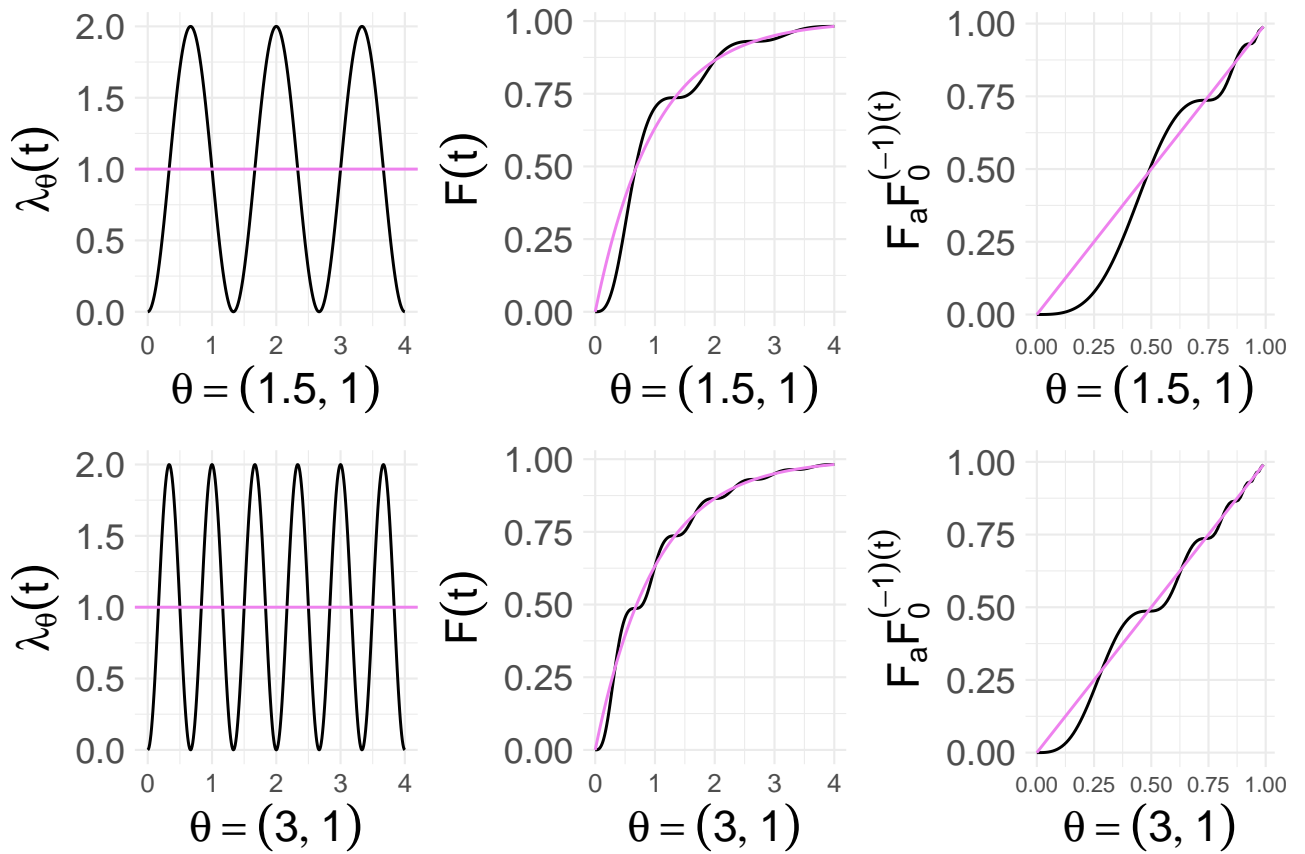

## 4.1 Type I error

For this experiment, the null hypothesis is recovered when  $\theta_2 = 0$ . In **red** we observe tests that have an clear incorrect level. In **orange**, we observe tests that have a questionable incorrect level

### 4.1.1 Periodic hazards experiment: Censoring parameter $\gamma = 1/2$

Fixed length-scale 1

|                   | Type-I error |       |       |         |       |       |       |
|-------------------|--------------|-------|-------|---------|-------|-------|-------|
|                   | MW1          | MW2   | MW3   | Pearson | LR1   | LR2   | WLR   |
| Sample size n=30  |              |       |       |         |       |       |       |
| 10 %              | 9.30         | 10.65 | 9.20  | 14.75   | 10.60 | 10.05 | 20.95 |
| 5 %               | 4.70         | 5.60  | 4.75  | 9.50    | 5.45  | 5.60  | 14.85 |
| 1 %               | 1.25         | 2.05  | 0.95  | 4.75    | 1.25  | 1.65  | 6.35  |
| Sample size n=50  |              |       |       |         |       |       |       |
| 10 %              | 10.55        | 11.70 | 10.90 | 13.95   | 10.35 | 10.80 | 15.50 |
| 5 %               | 5.70         | 6.70  | 5.90  | 8.35    | 5.55  | 5.75  | 9.70  |
| 1 %               | 1.25         | 1.55  | 1.35  | 3.60    | 1.90  | 1.80  | 3.20  |
| Sample size n=100 |              |       |       |         |       |       |       |
| 10 %              | 9.35         | 9.75  | 9.55  | 12.50   | 10.15 | 9.85  | 14.50 |
| 5 %               | 4.90         | 5.35  | 4.85  | 7.25    | 5.50  | 5.50  | 8.50  |
| 1 %               | 0.95         | 1.35  | 1.15  | 1.70    | 1.45  | 1.10  | 3.15  |
| Sample size n=200 |              |       |       |         |       |       |       |
| 10 %              | 10.80        | 11.05 | 10.85 | 10.10   | 10.75 | 10.40 | 10.90 |
| 5 %               | 5.65         | 5.95  | 5.50  | 4.90    | 5.60  | 5.95  | 6.20  |
| 1 %               | 1.00         | 1.25  | 1.10  | 0.90    | 1.35  | 0.85  | 1.95  |

## Adaptive length-scale

|                   |  | Type-I error |       |       |         |       |       |       |
|-------------------|--|--------------|-------|-------|---------|-------|-------|-------|
|                   |  | MW1          | MW2   | MW3   | Pearson | LR1   | LR2   | WLR   |
| Sample size n=30  |  |              |       |       |         |       |       |       |
| 10 %              |  | 10.00        | 11.05 | 9.90  | 14.75   | 10.60 | 10.05 | 20.95 |
| 5 %               |  | 5.25         | 6.15  | 4.85  | 9.50    | 5.45  | 5.60  | 14.85 |
| 1 %               |  | 1.05         | 1.50  | 0.95  | 4.75    | 1.25  | 1.65  | 6.35  |
| Sample size n=50  |  |              |       |       |         |       |       |       |
| 10 %              |  | 9.85         | 10.70 | 9.85  | 13.95   | 10.35 | 10.80 | 15.50 |
| 5 %               |  | 5.20         | 5.90  | 4.95  | 8.35    | 5.55  | 5.75  | 9.70  |
| 1 %               |  | 1.25         | 1.50  | 1.15  | 3.60    | 1.90  | 1.80  | 3.20  |
| Sample size n=100 |  |              |       |       |         |       |       |       |
| 10 %              |  | 9.80         | 10.30 | 9.40  | 12.50   | 10.15 | 9.85  | 14.50 |
| 5 %               |  | 4.35         | 4.55  | 4.10  | 7.25    | 5.50  | 5.50  | 8.50  |
| 1 %               |  | 1.10         | 1.20  | 1.05  | 1.70    | 1.45  | 1.10  | 3.15  |
| Sample size n=200 |  |              |       |       |         |       |       |       |
| 10 %              |  | 10.55        | 10.90 | 10.55 | 10.10   | 10.75 | 10.40 | 10.90 |
| 5 %               |  | 5.65         | 5.70  | 5.70  | 4.90    | 5.60  | 5.95  | 6.20  |
| 1 %               |  | 0.65         | 0.75  | 0.95  | 0.90    | 1.35  | 0.85  | 1.95  |

### 4.1.2 Periodic hazards experiment: Censoring parameter $\gamma = 2$

#### Fixed length-scale 1

|                   |  | Type-I error |       |       |         |       |       |       |
|-------------------|--|--------------|-------|-------|---------|-------|-------|-------|
|                   |  | MW1          | MW2   | MW3   | Pearson | LR1   | LR2   | WLR   |
| Sample size n=30  |  |              |       |       |         |       |       |       |
| 10 %              |  | 10.05        | 11.15 | 9.80  | 13.60   | 10.00 | 10.55 | 13.85 |
| 5 %               |  | 5.65         | 6.55  | 5.45  | 9.65    | 5.05  | 5.55  | 9.50  |
| 1 %               |  | 1.25         | 2.30  | 1.05  | 5.45    | 1.15  | 1.55  | 4.95  |
| Sample size n=50  |  |              |       |       |         |       |       |       |
| 10 %              |  | 10.80        | 11.20 | 10.50 | 13.95   | 11.20 | 10.15 | 13.75 |
| 5 %               |  | 5.80         | 6.50  | 5.80  | 9.25    | 6.00  | 5.85  | 9.65  |
| 1 %               |  | 1.35         | 1.75  | 1.40  | 4.55    | 1.60  | 1.60  | 5.70  |
| Sample size n=100 |  |              |       |       |         |       |       |       |
| 10 %              |  | 10.45        | 10.90 | 10.35 | 13.55   | 9.55  | 10.05 | 12.05 |
| 5 %               |  | 5.55         | 5.85  | 5.35  | 9.65    | 5.45  | 5.05  | 7.95  |
| 1 %               |  | 1.55         | 1.55  | 1.35  | 5.10    | 1.45  | 1.45  | 3.55  |
| Sample size n=200 |  |              |       |       |         |       |       |       |
| 10 %              |  | 9.85         | 10.20 | 10.25 | 14.15   | 9.65  | 10.00 | 11.30 |
| 5 %               |  | 4.80         | 5.25  | 5.10  | 9.50    | 4.75  | 4.90  | 6.65  |
| 1 %               |  | 0.85         | 1.10  | 0.85  | 4.30    | 1.00  | 0.90  | 2.60  |



## Adaptive length-scale

|                   |       | Type-I error |       |         |       |       |       |  |
|-------------------|-------|--------------|-------|---------|-------|-------|-------|--|
|                   | MW1   | MW2          | MW3   | Pearson | LR1   | LR2   | WLR   |  |
| Sample size n=30  |       |              |       |         |       |       |       |  |
| 10 %              | 10.25 | 11.30        | 10.20 | 13.60   | 10.00 | 10.55 | 13.85 |  |
| 5 %               | 5.40  | 6.35         | 5.20  | 9.65    | 5.05  | 5.55  | 9.50  |  |
| 1 %               | 1.20  | 1.50         | 1.40  | 5.45    | 1.15  | 1.55  | 4.95  |  |
| Sample size n=50  |       |              |       |         |       |       |       |  |
| 10 %              | 10.55 | 10.90        | 10.65 | 13.95   | 11.20 | 10.15 | 13.75 |  |
| 5 %               | 5.65  | 5.90         | 5.40  | 9.25    | 6.00  | 5.85  | 9.65  |  |
| 1 %               | 1.35  | 1.55         | 1.35  | 4.55    | 1.60  | 1.60  | 5.70  |  |
| Sample size n=100 |       |              |       |         |       |       |       |  |
| 10 %              | 10.30 | 10.45        | 10.30 | 13.55   | 9.55  | 10.05 | 12.05 |  |
| 5 %               | 5.45  | 5.45         | 5.30  | 9.65    | 5.45  | 5.05  | 7.95  |  |
| 1 %               | 1.65  | 1.75         | 1.50  | 5.10    | 1.45  | 1.45  | 3.55  |  |
| Sample size n=200 |       |              |       |         |       |       |       |  |
| 10 %              | 10.25 | 10.40        | 10.25 | 14.15   | 9.65  | 10.00 | 11.30 |  |
| 5 %               | 4.85  | 4.95         | 5.00  | 9.50    | 4.75  | 4.90  | 6.65  |  |
| 1 %               | 0.90  | 0.80         | 0.85  | 4.30    | 1.00  | 0.90  | 2.60  |  |

**4.1.3 Sample size 30; Censoring distribution  $G_1(t) = 1 - e^{-1/2t}$**

| Fixed length-scale 1                  |        |        |        |         |       |       |       |
|---------------------------------------|--------|--------|--------|---------|-------|-------|-------|
| Sample size $n = 30$ ; $\gamma = 1/2$ |        |        |        |         |       |       |       |
|                                       | MW1    | MW2    | MW3    | Pearson | LR1   | LR2   | WLR   |
| $\theta = (0.5, 1)$                   |        |        |        |         |       |       |       |
| 10 %                                  | 100.00 | 100.00 | 100.00 | 99.40   | 89.65 | 99.95 | 62.15 |
| 5 %                                   | 99.95  | 99.95  | 99.95  | 96.95   | 74.50 | 99.80 | 44.60 |
| 1 %                                   | 99.90  | 99.95  | 99.90  | 76.80   | 31.25 | 94.20 | 17.30 |
| $\theta = (0.7, 1)$                   |        |        |        |         |       |       |       |
| 10 %                                  | 99.80  | 99.90  | 99.85  | 95.85   | 43.95 | 97.95 | 40.85 |
| 5 %                                   | 99.45  | 99.55  | 99.45  | 86.05   | 27.45 | 90.25 | 27.90 |
| 1 %                                   | 96.45  | 97.95  | 96.50  | 56.55   | 6.40  | 49.15 | 10.70 |
| $\theta = (0.9, 1)$                   |        |        |        |         |       |       |       |
| 10 %                                  | 97.25  | 97.75  | 97.20  | 89.35   | 20.65 | 80.00 | 31.40 |
| 5 %                                   | 93.40  | 94.45  | 93.25  | 76.35   | 10.80 | 56.55 | 20.55 |
| 1 %                                   | 77.05  | 82.10  | 76.70  | 46.60   | 1.65  | 13.00 | 8.75  |
| $\theta = (1, 1)$                     |        |        |        |         |       |       |       |
| 10 %                                  | 93.10  | 94.25  | 93.10  | 87.35   | 16.20 | 62.80 | 31.35 |
| 5 %                                   | 84.70  | 86.60  | 84.55  | 73.60   | 8.05  | 39.55 | 21.55 |
| 1 %                                   | 60.00  | 65.75  | 59.80  | 42.05   | 0.80  | 6.55  | 10.30 |
| $\theta = (1.5, 1)$                   |        |        |        |         |       |       |       |
| 10 %                                  | 40.05  | 43.00  | 40.15  | 62.95   | 8.40  | 18.20 | 25.20 |
| 5 %                                   | 26.45  | 29.95  | 26.20  | 46.20   | 3.85  | 7.35  | 17.85 |
| 1 %                                   | 8.60   | 11.90  | 8.40   | 21.75   | 0.55  | 1.00  | 8.70  |
| $\theta = (3, 1)$                     |        |        |        |         |       |       |       |
| 10 %                                  | 11.60  | 13.20  | 11.70  | 20.00   | 8.95  | 5.35  | 19.35 |
| 5 %                                   | 5.20   | 7.15   | 5.25   | 12.70   | 4.55  | 2.20  | 13.60 |
| 1 %                                   | 1.50   | 2.25   | 1.55   | 4.90    | 0.95  | 0.25  | 6.70  |

| Adaptive length-scale                 |       |       |       |         |       |       |       |
|---------------------------------------|-------|-------|-------|---------|-------|-------|-------|
| Sample size $n = 30$ ; $\gamma = 1/2$ |       |       |       |         |       |       |       |
|                                       | MW1   | MW2   | MW3   | Pearson | LR1   | LR2   | WLR   |
| $\theta = (0.5, 1)$                   |       |       |       |         |       |       |       |
| 10 %                                  | 99.95 | 99.95 | 99.95 | 99.40   | 89.65 | 99.95 | 70.15 |
| 5 %                                   | 99.95 | 99.95 | 99.95 | 96.95   | 74.50 | 99.80 | 52.40 |
| 1 %                                   | 99.75 | 99.80 | 99.75 | 76.80   | 31.25 | 94.20 | 21.35 |
| $\theta = (0.7, 1)$                   |       |       |       |         |       |       |       |
| 10 %                                  | 99.90 | 99.90 | 99.90 | 95.85   | 43.95 | 97.95 | 46.50 |
| 5 %                                   | 99.75 | 99.85 | 99.75 | 86.05   | 27.45 | 90.25 | 29.20 |
| 1 %                                   | 96.30 | 97.50 | 96.85 | 56.55   | 6.40  | 49.15 | 8.60  |
| $\theta = (0.9, 1)$                   |       |       |       |         |       |       |       |
| 10 %                                  | 99.25 | 99.35 | 99.30 | 89.35   | 20.65 | 80.00 | 33.75 |
| 5 %                                   | 97.90 | 98.40 | 98.00 | 76.35   | 10.80 | 56.55 | 20.20 |
| 1 %                                   | 87.80 | 89.15 | 87.70 | 46.60   | 1.65  | 13.00 | 6.00  |
| $\theta = (1, 1)$                     |       |       |       |         |       |       |       |
| 10 %                                  | 98.60 | 99.05 | 98.60 | 87.35   | 16.20 | 62.80 | 30.55 |
| 5 %                                   | 95.50 | 96.25 | 95.30 | 73.60   | 8.05  | 39.55 | 18.30 |
| 1 %                                   | 82.00 | 83.75 | 82.40 | 42.05   | 0.80  | 6.55  | 5.35  |
| $\theta = (1.5, 1)$                   |       |       |       |         |       |       |       |
| 10 %                                  | 84.85 | 86.65 | 84.50 | 62.95   | 8.40  | 18.20 | 25.20 |
| 5 %                                   | 71.70 | 73.65 | 71.50 | 46.20   | 3.85  | 7.35  | 15.50 |
| 1 %                                   | 39.90 | 43.40 | 40.85 | 21.75   | 0.55  | 1.00  | 5.50  |
| $\theta = (3, 1)$                     |       |       |       |         |       |       |       |
| 10 %                                  | 23.40 | 25.80 | 23.40 | 20.00   | 8.95  | 5.35  | 18.85 |
| 5 %                                   | 13.40 | 15.65 | 13.60 | 12.70   | 4.55  | 2.20  | 11.05 |
| 1 %                                   | 4.00  | 5.60  | 4.10  | 4.90    | 0.95  | 0.25  | 3.40  |

4.1.4 Sample size 30; Censoring distribution  $G_2(t) = 1 - e^{-2t}$

| Fixed length-scale 1                |       |       |       |         |       |       |       |
|-------------------------------------|-------|-------|-------|---------|-------|-------|-------|
| Sample size $n = 30$ ; $\gamma = 2$ |       |       |       |         |       |       |       |
|                                     | MW1   | MW2   | MW3   | Pearson | LR1   | LR2   | WLR   |
| $\theta = (0.5, 1)$                 |       |       |       |         |       |       |       |
| 10 %                                | 99.95 | 99.95 | 99.95 | 86.00   | 98.35 | 99.95 | 47.55 |
| 5 %                                 | 99.95 | 99.95 | 99.95 | 62.10   | 93.30 | 99.65 | 24.50 |
| 1 %                                 | 99.80 | 99.90 | 99.85 | 18.85   | 62.05 | 84.00 | 3.25  |
| $\theta = (0.7, 1)$                 |       |       |       |         |       |       |       |
| 10 %                                | 99.70 | 99.75 | 99.70 | 69.70   | 82.55 | 99.40 | 23.60 |
| 5 %                                 | 99.45 | 99.50 | 99.45 | 46.10   | 66.35 | 96.15 | 10.80 |
| 1 %                                 | 96.65 | 97.65 | 96.50 | 18.80   | 24.05 | 54.95 | 3.10  |
| $\theta = (0.9, 1)$                 |       |       |       |         |       |       |       |
| 10 %                                | 98.15 | 98.35 | 98.20 | 60.30   | 58.95 | 95.90 | 13.35 |
| 5 %                                 | 96.10 | 96.85 | 96.15 | 39.05   | 36.75 | 85.85 | 7.40  |
| 1 %                                 | 87.60 | 90.50 | 87.80 | 19.20   | 8.85  | 28.00 | 3.55  |
| $\theta = (1, 1)$                   |       |       |       |         |       |       |       |
| 10 %                                | 96.20 | 96.80 | 96.15 | 54.85   | 45.60 | 92.20 | 12.30 |
| 5 %                                 | 92.60 | 93.75 | 92.65 | 35.25   | 27.45 | 75.55 | 7.45  |
| 1 %                                 | 77.45 | 81.65 | 77.80 | 17.60   | 4.65  | 17.80 | 3.55  |
| $\theta = (1.5, 1)$                 |       |       |       |         |       |       |       |
| 10 %                                | 65.35 | 68.30 | 65.25 | 44.65   | 17.25 | 54.85 | 9.45  |
| 5 %                                 | 51.70 | 56.20 | 52.10 | 29.35   | 7.90  | 30.55 | 6.45  |
| 1 %                                 | 30.75 | 35.90 | 30.50 | 14.70   | 0.90  | 1.50  | 3.60  |
| $\theta = (3, 1)$                   |       |       |       |         |       |       |       |
| 10 %                                | 14.70 | 16.25 | 14.55 | 15.75   | 7.75  | 8.65  | 10.35 |
| 5 %                                 | 8.90  | 10.95 | 8.90  | 11.45   | 3.15  | 2.65  | 7.25  |
| 1 %                                 | 2.65  | 3.95  | 2.80  | 5.55    | 0.40  | 0.00  | 3.55  |

| Adaptive length-scale               |       |       |       |         |       |       |       |
|-------------------------------------|-------|-------|-------|---------|-------|-------|-------|
| Sample size $n = 30$ ; $\gamma = 2$ |       |       |       |         |       |       |       |
|                                     | MW1   | MW2   | MW3   | Pearson | LR1   | LR2   | WLR   |
| $\theta = (0.5, 1)$                 |       |       |       |         |       |       |       |
| 10 %                                | 99.95 | 99.95 | 99.95 | 86.00   | 98.35 | 99.95 | 52.40 |
| 5 %                                 | 99.90 | 99.90 | 99.90 | 62.10   | 93.30 | 99.65 | 29.75 |
| 1 %                                 | 99.55 | 99.55 | 99.45 | 18.85   | 62.05 | 84.00 | 4.85  |
| $\theta = (0.7, 1)$                 |       |       |       |         |       |       |       |
| 10 %                                | 99.80 | 99.80 | 99.75 | 69.70   | 82.55 | 99.40 | 28.25 |
| 5 %                                 | 99.45 | 99.60 | 99.45 | 46.10   | 66.35 | 96.15 | 12.75 |
| 1 %                                 | 95.70 | 95.50 | 95.90 | 18.80   | 24.05 | 54.95 | 2.80  |
| $\theta = (0.9, 1)$                 |       |       |       |         |       |       |       |
| 10 %                                | 99.25 | 99.25 | 99.20 | 60.30   | 58.95 | 95.90 | 17.55 |
| 5 %                                 | 97.80 | 97.65 | 97.80 | 39.05   | 36.75 | 85.85 | 7.55  |
| 1 %                                 | 89.50 | 88.45 | 89.55 | 19.20   | 8.85  | 28.00 | 2.65  |
| $\theta = (1, 1)$                   |       |       |       |         |       |       |       |
| 10 %                                | 98.45 | 98.40 | 98.40 | 54.85   | 45.60 | 92.20 | 15.15 |
| 5 %                                 | 96.05 | 96.05 | 95.80 | 35.25   | 27.45 | 75.55 | 7.40  |
| 1 %                                 | 83.85 | 81.10 | 83.50 | 17.60   | 4.65  | 17.80 | 2.55  |
| $\theta = (1.5, 1)$                 |       |       |       |         |       |       |       |
| 10 %                                | 88.30 | 88.70 | 88.20 | 44.65   | 17.25 | 54.85 | 7.90  |
| 5 %                                 | 77.55 | 77.85 | 77.55 | 29.35   | 7.90  | 30.55 | 3.60  |
| 1 %                                 | 51.10 | 47.00 | 51.40 | 14.70   | 0.90  | 1.50  | 1.40  |
| $\theta = (3, 1)$                   |       |       |       |         |       |       |       |
| 10 %                                | 38.85 | 40.30 | 38.75 | 15.75   | 7.75  | 8.65  | 6.30  |
| 5 %                                 | 22.35 | 23.80 | 22.35 | 11.45   | 3.15  | 2.65  | 3.85  |
| 1 %                                 | 5.40  | 6.30  | 5.10  | 5.55    | 0.40  | 0.00  | 2.25  |

**4.1.5 Sample size 50; Censoring distribution  $G_1(t) = 1 - e^{-1/2t}$**

| Fixed length-scale 1                  |        |        |        |         |       |        |       |
|---------------------------------------|--------|--------|--------|---------|-------|--------|-------|
| Sample size $n = 50$ ; $\gamma = 1/2$ |        |        |        |         |       |        |       |
|                                       | MW1    | MW2    | MW3    | Pearson | LR1   | LR2    | WLR   |
| $\theta = (0.5, 1)$                   |        |        |        |         |       |        |       |
| 10 %                                  | 100.00 | 100.00 | 100.00 | 100.00  | 99.25 | 100.00 | 94.10 |
| 5 %                                   | 100.00 | 100.00 | 100.00 | 99.95   | 97.50 | 100.00 | 88.35 |
| 1 %                                   | 100.00 | 100.00 | 100.00 | 99.85   | 79.35 | 99.95  | 61.25 |
| $\theta = (0.7, 1)$                   |        |        |        |         |       |        |       |
| 10 %                                  | 100.00 | 100.00 | 100.00 | 99.95   | 71.50 | 99.95  | 76.10 |
| 5 %                                   | 100.00 | 100.00 | 100.00 | 99.85   | 53.75 | 99.85  | 60.75 |
| 1 %                                   | 99.95  | 99.95  | 99.90  | 96.25   | 17.95 | 95.15  | 30.90 |
| $\theta = (0.9, 1)$                   |        |        |        |         |       |        |       |
| 10 %                                  | 99.95  | 99.90  | 99.95  | 99.55   | 36.85 | 98.15  | 57.10 |
| 5 %                                   | 99.80  | 99.80  | 99.80  | 98.70   | 22.25 | 91.90  | 42.00 |
| 1 %                                   | 96.60  | 97.40  | 96.85  | 87.45   | 4.50  | 59.05  | 18.20 |
| $\theta = (1, 1)$                     |        |        |        |         |       |        |       |
| 10 %                                  | 99.45  | 99.45  | 99.45  | 99.45   | 25.75 | 92.75  | 53.15 |
| 5 %                                   | 98.10  | 98.45  | 98.25  | 97.50   | 14.45 | 79.45  | 38.15 |
| 1 %                                   | 88.70  | 90.50  | 89.00  | 83.25   | 2.25  | 35.60  | 16.20 |
| $\theta = (1.5, 1)$                   |        |        |        |         |       |        |       |
| 10 %                                  | 62.50  | 64.30  | 63.10  | 87.80   | 11.25 | 37.00  | 39.95 |
| 5 %                                   | 43.60  | 46.50  | 43.55  | 76.70   | 5.35  | 19.70  | 28.10 |
| 1 %                                   | 16.95  | 19.85  | 16.60  | 49.20   | 1.05  | 3.00   | 12.90 |
| $\theta = (3, 1)$                     |        |        |        |         |       |        |       |
| 10 %                                  | 12.65  | 13.75  | 12.45  | 22.20   | 8.65  | 7.50   | 18.30 |
| 5 %                                   | 6.85   | 7.80   | 6.90   | 14.20   | 4.75  | 3.25   | 12.80 |
| 1 %                                   | 1.65   | 2.90   | 2.05   | 5.75    | 1.00  | 0.30   | 5.60  |

| Adaptive length-scale                 |        |        |        |         |       |        |       |
|---------------------------------------|--------|--------|--------|---------|-------|--------|-------|
| Sample size $n = 50$ ; $\gamma = 1/2$ |        |        |        |         |       |        |       |
|                                       | MW1    | MW2    | MW3    | Pearson | LR1   | LR2    | WLR   |
| $\theta = (0.5, 1)$                   |        |        |        |         |       |        |       |
| 10 %                                  | 100.00 | 100.00 | 100.00 | 100.00  | 99.25 | 100.00 | 94.10 |
| 5 %                                   | 100.00 | 100.00 | 100.00 | 99.95   | 97.50 | 100.00 | 88.35 |
| 1 %                                   | 100.00 | 100.00 | 100.00 | 99.85   | 79.35 | 99.95  | 61.25 |
| $\theta = (0.7, 1)$                   |        |        |        |         |       |        |       |
| 10 %                                  | 100.00 | 100.00 | 100.00 | 99.95   | 71.50 | 99.95  | 76.10 |
| 5 %                                   | 100.00 | 100.00 | 100.00 | 99.85   | 53.75 | 99.85  | 60.75 |
| 1 %                                   | 99.95  | 100.00 | 99.90  | 96.25   | 17.95 | 95.15  | 30.90 |
| $\theta = (0.9, 1)$                   |        |        |        |         |       |        |       |
| 10 %                                  | 100.00 | 100.00 | 100.00 | 99.55   | 36.85 | 98.15  | 57.10 |
| 5 %                                   | 99.95  | 99.95  | 99.95  | 98.70   | 22.25 | 91.90  | 42.00 |
| 1 %                                   | 99.55  | 99.75  | 99.50  | 87.45   | 4.50  | 59.05  | 18.20 |
| $\theta = (1, 1)$                     |        |        |        |         |       |        |       |
| 10 %                                  | 100.00 | 100.00 | 100.00 | 99.45   | 25.75 | 92.75  | 53.15 |
| 5 %                                   | 99.85  | 99.90  | 99.80  | 97.50   | 14.45 | 79.45  | 38.15 |
| 1 %                                   | 98.50  | 98.75  | 98.80  | 83.25   | 2.25  | 35.60  | 16.20 |
| $\theta = (1.5, 1)$                   |        |        |        |         |       |        |       |
| 10 %                                  | 98.35  | 98.45  | 98.45  | 87.80   | 11.25 | 37.00  | 39.95 |
| 5 %                                   | 94.20  | 94.65  | 94.20  | 76.70   | 5.35  | 19.70  | 28.10 |
| 1 %                                   | 74.65  | 75.95  | 74.30  | 49.20   | 1.05  | 3.00   | 12.90 |
| $\theta = (3, 1)$                     |        |        |        |         |       |        |       |
| 10 %                                  | 33.90  | 35.70  | 34.45  | 22.20   | 8.65  | 7.50   | 18.30 |
| 5 %                                   | 20.30  | 21.50  | 19.75  | 14.20   | 4.75  | 3.25   | 12.80 |
| 1 %                                   | 6.55   | 7.20   | 6.20   | 5.75    | 1.00  | 0.30   | 5.60  |

**4.1.6 Sample size 50; Censoring distribution  $G_2(t) = 1 - e^{-2t}$**

| Fixed length-scale 1             |        |        |        |         |        |        |       |
|----------------------------------|--------|--------|--------|---------|--------|--------|-------|
| Sample size $n = 50; \gamma = 2$ |        |        |        |         |        |        |       |
|                                  | MW1    | MW2    | MW3    | Pearson | LR1    | LR2    | WLR   |
| $\theta = (0.5, 1)$              |        |        |        |         |        |        |       |
| 10 %                             | 100.00 | 100.00 | 100.00 | 99.95   | 100.00 | 100.00 | 94.25 |
| 5 %                              | 100.00 | 100.00 | 100.00 | 99.45   | 99.80  | 100.00 | 83.80 |
| 1 %                              | 100.00 | 100.00 | 100.00 | 85.00   | 96.00  | 99.95  | 40.55 |
| $\theta = (0.7, 1)$              |        |        |        |         |        |        |       |
| 10 %                             | 100.00 | 100.00 | 100.00 | 99.00   | 97.95  | 100.00 | 65.80 |
| 5 %                              | 100.00 | 100.00 | 100.00 | 95.40   | 94.20  | 99.95  | 44.75 |
| 1 %                              | 99.90  | 99.85  | 99.85  | 62.40   | 68.75  | 98.65  | 12.75 |
| $\theta = (0.9, 1)$              |        |        |        |         |        |        |       |
| 10 %                             | 99.95  | 99.95  | 99.95  | 95.50   | 84.40  | 99.95  | 41.50 |
| 5 %                              | 99.75  | 99.80  | 99.75  | 85.45   | 70.20  | 99.50  | 24.50 |
| 1 %                              | 98.20  | 98.75  | 98.10  | 47.50   | 30.70  | 89.05  | 5.80  |
| $\theta = (1, 1)$                |        |        |        |         |        |        |       |
| 10 %                             | 99.80  | 99.80  | 99.80  | 92.80   | 72.80  | 99.80  | 30.20 |
| 5 %                              | 99.30  | 99.30  | 99.25  | 81.90   | 54.30  | 98.55  | 17.55 |
| 1 %                              | 95.70  | 96.40  | 95.35  | 41.95   | 17.60  | 79.20  | 5.55  |
| $\theta = (1.5, 1)$              |        |        |        |         |        |        |       |
| 10 %                             | 85.00  | 86.45  | 85.10  | 75.35   | 29.40  | 87.35  | 14.25 |
| 5 %                              | 75.35  | 77.30  | 75.00  | 58.75   | 15.95  | 69.15  | 8.60  |
| 1 %                              | 51.30  | 55.40  | 51.35  | 29.30   | 3.70   | 22.80  | 3.20  |
| $\theta = (3, 1)$                |        |        |        |         |        |        |       |
| 10 %                             | 20.05  | 21.20  | 20.30  | 21.55   | 10.70  | 17.65  | 9.25  |
| 5 %                              | 13.15  | 14.60  | 12.95  | 14.90   | 4.35   | 8.05   | 5.60  |
| 1 %                              | 4.35   | 5.50   | 4.55   | 6.75    | 0.65   | 0.70   | 3.15  |

| Adaptive length-scale            |        |        |        |         |        |        |       |
|----------------------------------|--------|--------|--------|---------|--------|--------|-------|
| Sample size $n = 50; \gamma = 2$ |        |        |        |         |        |        |       |
|                                  | MW1    | MW2    | MW3    | Pearson | LR1    | LR2    | WLR   |
| $\theta = (0.5, 1)$              |        |        |        |         |        |        |       |
| 10 %                             | 100.00 | 100.00 | 100.00 | 99.95   | 100.00 | 100.00 | 94.25 |
| 5 %                              | 100.00 | 100.00 | 100.00 | 99.45   | 99.80  | 100.00 | 83.80 |
| 1 %                              | 99.95  | 99.95  | 99.95  | 85.00   | 96.00  | 99.95  | 40.55 |
| $\theta = (0.7, 1)$              |        |        |        |         |        |        |       |
| 10 %                             | 100.00 | 100.00 | 100.00 | 99.00   | 97.95  | 100.00 | 65.80 |
| 5 %                              | 100.00 | 100.00 | 99.95  | 95.40   | 94.20  | 99.95  | 44.75 |
| 1 %                              | 99.95  | 99.90  | 99.95  | 62.40   | 68.75  | 98.65  | 12.75 |
| $\theta = (0.9, 1)$              |        |        |        |         |        |        |       |
| 10 %                             | 100.00 | 100.00 | 100.00 | 95.50   | 84.40  | 99.95  | 41.50 |
| 5 %                              | 99.95  | 99.95  | 99.95  | 85.45   | 70.20  | 99.50  | 24.50 |
| 1 %                              | 99.05  | 99.05  | 99.15  | 47.50   | 30.70  | 89.05  | 5.80  |
| $\theta = (1, 1)$                |        |        |        |         |        |        |       |
| 10 %                             | 99.95  | 99.95  | 99.95  | 92.80   | 72.80  | 99.80  | 30.20 |
| 5 %                              | 99.90  | 99.90  | 99.95  | 81.90   | 54.30  | 98.55  | 17.55 |
| 1 %                              | 98.50  | 98.35  | 98.65  | 41.95   | 17.60  | 79.20  | 5.55  |
| $\theta = (1.5, 1)$              |        |        |        |         |        |        |       |
| 10 %                             | 98.85  | 98.80  | 98.80  | 75.35   | 29.40  | 87.35  | 14.25 |
| 5 %                              | 96.35  | 96.50  | 96.20  | 58.75   | 15.95  | 69.15  | 8.60  |
| 1 %                              | 83.25  | 81.05  | 83.10  | 29.30   | 3.70   | 22.80  | 3.20  |
| $\theta = (3, 1)$                |        |        |        |         |        |        |       |
| 10 %                             | 63.15  | 64.40  | 63.55  | 21.55   | 10.70  | 17.65  | 9.25  |
| 5 %                              | 40.80  | 42.10  | 41.05  | 14.90   | 4.35   | 8.05   | 5.60  |
| 1 %                              | 11.80  | 12.60  | 12.05  | 6.75    | 0.65   | 0.70   | 3.15  |

**4.1.7 Sample size 100; Censoring distribution  $G_1(t) = 1 - e^{-1/2t}$**

| Fixed length-scale 1                   |        |        |        |         |        |        |        |
|----------------------------------------|--------|--------|--------|---------|--------|--------|--------|
| Sample size $n = 100$ ; $\gamma = 1/2$ |        |        |        |         |        |        |        |
|                                        | MW1    | MW2    | MW3    | Pearson | LR1    | LR2    | WLR    |
| $\theta = (0.5, 1)$                    |        |        |        |         |        |        |        |
| 10 %                                   | 100.00 | 100.00 | 100.00 | 100.00  | 100.00 | 100.00 | 100.00 |
| 5 %                                    | 100.00 | 100.00 | 100.00 | 100.00  | 100.00 | 100.00 | 100.00 |
| 1 %                                    | 100.00 | 100.00 | 100.00 | 100.00  | 99.85  | 100.00 | 99.70  |
| $\theta = (0.7, 1)$                    |        |        |        |         |        |        |        |
| 10 %                                   | 100.00 | 100.00 | 100.00 | 100.00  | 97.00  | 100.00 | 99.50  |
| 5 %                                    | 100.00 | 100.00 | 100.00 | 100.00  | 92.20  | 100.00 | 98.10  |
| 1 %                                    | 100.00 | 100.00 | 100.00 | 100.00  | 66.75  | 100.00 | 88.95  |
| $\theta = (0.9, 1)$                    |        |        |        |         |        |        |        |
| 10 %                                   | 100.00 | 100.00 | 100.00 | 100.00  | 66.40  | 100.00 | 96.40  |
| 5 %                                    | 100.00 | 100.00 | 100.00 | 100.00  | 49.25  | 100.00 | 91.00  |
| 1 %                                    | 100.00 | 100.00 | 100.00 | 100.00  | 19.30  | 99.65  | 69.65  |
| $\theta = (1, 1)$                      |        |        |        |         |        |        |        |
| 10 %                                   | 100.00 | 100.00 | 100.00 | 100.00  | 49.65  | 100.00 | 93.65  |
| 5 %                                    | 100.00 | 100.00 | 100.00 | 100.00  | 33.25  | 99.85  | 85.25  |
| 1 %                                    | 100.00 | 100.00 | 100.00 | 100.00  | 11.55  | 94.60  | 62.30  |
| $\theta = (1.5, 1)$                    |        |        |        |         |        |        |        |
| 10 %                                   | 94.90  | 95.45  | 95.00  | 99.85   | 16.70  | 77.75  | 79.60  |
| 5 %                                    | 84.20  | 84.65  | 84.50  | 99.10   | 8.95   | 59.10  | 65.75  |
| 1 %                                    | 50.35  | 53.25  | 50.65  | 94.70   | 1.95   | 18.70  | 38.65  |
| $\theta = (3, 1)$                      |        |        |        |         |        |        |        |
| 10 %                                   | 13.85  | 14.90  | 13.90  | 28.55   | 9.80   | 11.50  | 27.50  |
| 5 %                                    | 8.00   | 8.20   | 7.80   | 19.15   | 5.00   | 5.80   | 18.50  |
| 1 %                                    | 2.15   | 2.45   | 2.30   | 7.25    | 0.90   | 0.95   | 7.90   |

| Adaptive length-scale                  |        |        |        |         |        |        |        |
|----------------------------------------|--------|--------|--------|---------|--------|--------|--------|
| Sample size $n = 100$ ; $\gamma = 1/2$ |        |        |        |         |        |        |        |
|                                        | MW1    | MW2    | MW3    | Pearson | LR1    | LR2    | WLR    |
| $\theta = (0.5, 1)$                    |        |        |        |         |        |        |        |
| 10 %                                   | 100.00 | 100.00 | 100.00 | 100.00  | 100.00 | 100.00 | 100.00 |
| 5 %                                    | 100.00 | 100.00 | 100.00 | 100.00  | 100.00 | 100.00 | 100.00 |
| 1 %                                    | 100.00 | 100.00 | 100.00 | 100.00  | 99.85  | 100.00 | 99.70  |
| $\theta = (0.7, 1)$                    |        |        |        |         |        |        |        |
| 10 %                                   | 100.00 | 100.00 | 100.00 | 100.00  | 97.00  | 100.00 | 99.50  |
| 5 %                                    | 100.00 | 100.00 | 100.00 | 100.00  | 92.20  | 100.00 | 98.10  |
| 1 %                                    | 100.00 | 100.00 | 100.00 | 100.00  | 66.75  | 100.00 | 88.95  |
| $\theta = (0.9, 1)$                    |        |        |        |         |        |        |        |
| 10 %                                   | 100.00 | 100.00 | 100.00 | 100.00  | 66.40  | 100.00 | 96.40  |
| 5 %                                    | 100.00 | 100.00 | 100.00 | 100.00  | 49.25  | 100.00 | 91.00  |
| 1 %                                    | 100.00 | 100.00 | 100.00 | 100.00  | 19.30  | 99.65  | 69.65  |
| $\theta = (1, 1)$                      |        |        |        |         |        |        |        |
| 10 %                                   | 100.00 | 100.00 | 100.00 | 100.00  | 49.65  | 100.00 | 93.65  |
| 5 %                                    | 100.00 | 100.00 | 100.00 | 100.00  | 33.25  | 99.85  | 85.25  |
| 1 %                                    | 100.00 | 100.00 | 100.00 | 100.00  | 11.55  | 94.60  | 62.30  |
| $\theta = (1.5, 1)$                    |        |        |        |         |        |        |        |
| 10 %                                   | 100.00 | 100.00 | 100.00 | 99.85   | 16.70  | 77.75  | 79.60  |
| 5 %                                    | 100.00 | 100.00 | 100.00 | 99.10   | 8.95   | 59.10  | 65.75  |
| 1 %                                    | 99.55  | 99.70  | 99.65  | 94.70   | 1.95   | 18.70  | 38.65  |
| $\theta = (3, 1)$                      |        |        |        |         |        |        |        |
| 10 %                                   | 67.00  | 67.65  | 67.05  | 28.55   | 9.80   | 11.50  | 27.50  |
| 5 %                                    | 43.55  | 44.65  | 43.45  | 19.15   | 5.00   | 5.80   | 18.50  |
| 1 %                                    | 14.20  | 15.20  | 14.55  | 7.25    | 0.90   | 0.95   | 7.90   |

4.1.8 Sample size 100; Censoring distribution  $G_2(t) = 1 - e^{-2t}$

| Fixed length-scale 1                 |        |        |        |         |        |        |        |
|--------------------------------------|--------|--------|--------|---------|--------|--------|--------|
| Sample size $n = 100$ ; $\gamma = 2$ |        |        |        |         |        |        |        |
|                                      | MW1    | MW2    | MW3    | Pearson | LR1    | LR2    | WLR    |
| $\theta = (0.5, 1)$                  |        |        |        |         |        |        |        |
| 10 %                                 | 100.00 | 100.00 | 100.00 | 100.00  | 100.00 | 100.00 | 100.00 |
| 5 %                                  | 100.00 | 100.00 | 100.00 | 100.00  | 100.00 | 100.00 | 100.00 |
| 1 %                                  | 100.00 | 100.00 | 100.00 | 100.00  | 100.00 | 100.00 | 99.55  |
| $\theta = (0.7, 1)$                  |        |        |        |         |        |        |        |
| 10 %                                 | 100.00 | 100.00 | 100.00 | 100.00  | 100.00 | 100.00 | 99.20  |
| 5 %                                  | 100.00 | 100.00 | 100.00 | 100.00  | 99.95  | 100.00 | 97.50  |
| 1 %                                  | 100.00 | 100.00 | 100.00 | 100.00  | 99.35  | 100.00 | 83.95  |
| $\theta = (0.9, 1)$                  |        |        |        |         |        |        |        |
| 10 %                                 | 100.00 | 100.00 | 100.00 | 100.00  | 99.40  | 100.00 | 90.65  |
| 5 %                                  | 100.00 | 100.00 | 100.00 | 100.00  | 97.80  | 100.00 | 79.20  |
| 1 %                                  | 100.00 | 100.00 | 100.00 | 99.55   | 85.35  | 100.00 | 43.05  |
| $\theta = (1, 1)$                    |        |        |        |         |        |        |        |
| 10 %                                 | 100.00 | 100.00 | 100.00 | 100.00  | 97.25  | 100.00 | 79.95  |
| 5 %                                  | 100.00 | 100.00 | 100.00 | 99.95   | 92.70  | 100.00 | 63.15  |
| 1 %                                  | 100.00 | 100.00 | 100.00 | 98.55   | 67.90  | 100.00 | 29.10  |
| $\theta = (1.5, 1)$                  |        |        |        |         |        |        |        |
| 10 %                                 | 99.35  | 99.30  | 99.30  | 99.00   | 54.70  | 99.90  | 31.10  |
| 5 %                                  | 97.35  | 97.40  | 97.25  | 96.65   | 37.60  | 99.20  | 17.50  |
| 1 %                                  | 88.00  | 88.50  | 87.75  | 82.20   | 12.10  | 87.85  | 4.15   |
| $\theta = (3, 1)$                    |        |        |        |         |        |        |        |
| 10 %                                 | 27.45  | 27.95  | 27.60  | 34.45   | 12.20  | 38.90  | 14.20  |
| 5 %                                  | 17.55  | 18.45  | 17.50  | 23.25   | 5.75   | 22.45  | 9.95   |
| 1 %                                  | 5.80   | 6.55   | 6.00   | 9.80    | 1.25   | 3.90   | 4.55   |

| Adaptive length-scale                |        |        |        |         |        |        |        |
|--------------------------------------|--------|--------|--------|---------|--------|--------|--------|
| Sample size $n = 100$ ; $\gamma = 2$ |        |        |        |         |        |        |        |
|                                      | MW1    | MW2    | MW3    | Pearson | LR1    | LR2    | WLR    |
| $\theta = (0.5, 1)$                  |        |        |        |         |        |        |        |
| 10 %                                 | 100.00 | 100.00 | 100.00 | 100.00  | 100.00 | 100.00 | 100.00 |
| 5 %                                  | 100.00 | 100.00 | 100.00 | 100.00  | 100.00 | 100.00 | 100.00 |
| 1 %                                  | 100.00 | 100.00 | 100.00 | 100.00  | 100.00 | 100.00 | 99.55  |
| $\theta = (0.7, 1)$                  |        |        |        |         |        |        |        |
| 10 %                                 | 100.00 | 100.00 | 100.00 | 100.00  | 100.00 | 100.00 | 99.20  |
| 5 %                                  | 100.00 | 100.00 | 100.00 | 100.00  | 99.95  | 100.00 | 97.50  |
| 1 %                                  | 100.00 | 100.00 | 100.00 | 100.00  | 99.35  | 100.00 | 83.95  |
| $\theta = (0.9, 1)$                  |        |        |        |         |        |        |        |
| 10 %                                 | 100.00 | 100.00 | 100.00 | 100.00  | 99.40  | 100.00 | 90.65  |
| 5 %                                  | 100.00 | 100.00 | 100.00 | 100.00  | 97.80  | 100.00 | 79.20  |
| 1 %                                  | 100.00 | 100.00 | 100.00 | 99.55   | 85.35  | 100.00 | 43.05  |
| $\theta = (1, 1)$                    |        |        |        |         |        |        |        |
| 10 %                                 | 100.00 | 100.00 | 100.00 | 100.00  | 97.25  | 100.00 | 80.90  |
| 5 %                                  | 100.00 | 100.00 | 100.00 | 99.95   | 92.70  | 100.00 | 65.30  |
| 1 %                                  | 100.00 | 100.00 | 100.00 | 98.55   | 67.90  | 100.00 | 27.95  |
| $\theta = (1.5, 1)$                  |        |        |        |         |        |        |        |
| 10 %                                 | 100.00 | 100.00 | 100.00 | 99.00   | 54.70  | 99.90  | 35.35  |
| 5 %                                  | 100.00 | 100.00 | 100.00 | 96.65   | 37.60  | 99.20  | 21.40  |
| 1 %                                  | 99.85  | 99.80  | 99.80  | 82.20   | 12.10  | 87.85  | 5.30   |
| $\theta = (3, 1)$                    |        |        |        |         |        |        |        |
| 10 %                                 | 95.20  | 95.10  | 95.15  | 34.45   | 12.20  | 38.90  | 11.80  |
| 5 %                                  | 86.70  | 86.80  | 86.90  | 23.25   | 5.75   | 22.45  | 7.20   |
| 1 %                                  | 49.30  | 48.45  | 49.65  | 9.80    | 1.25   | 3.90   | 2.85   |

**4.1.9 Sample size 200; Censoring distribution  $G_1(t) = 1 - e^{-1/2t}$**

| Fixed length-scale 1                   |        |        |        |         |        |        |        |
|----------------------------------------|--------|--------|--------|---------|--------|--------|--------|
| Sample size $n = 200$ ; $\gamma = 1/2$ |        |        |        |         |        |        |        |
|                                        | MW1    | MW2    | MW3    | Pearson | LR1    | LR2    | WLR    |
| $\theta = (0.5, 1)$                    |        |        |        |         |        |        |        |
| 10 %                                   | 100.00 | 100.00 | 100.00 | 100.00  | 100.00 | 100.00 | 100.00 |
| 5 %                                    | 100.00 | 100.00 | 100.00 | 100.00  | 100.00 | 100.00 | 100.00 |
| 1 %                                    | 100.00 | 100.00 | 100.00 | 100.00  | 100.00 | 100.00 | 100.00 |
| $\theta = (0.7, 1)$                    |        |        |        |         |        |        |        |
| 10 %                                   | 100.00 | 100.00 | 100.00 | 100.00  | 100.00 | 100.00 | 100.00 |
| 5 %                                    | 100.00 | 100.00 | 100.00 | 100.00  | 99.90  | 100.00 | 100.00 |
| 1 %                                    | 100.00 | 100.00 | 100.00 | 100.00  | 98.80  | 100.00 | 100.00 |
| $\theta = (0.9, 1)$                    |        |        |        |         |        |        |        |
| 10 %                                   | 100.00 | 100.00 | 100.00 | 100.00  | 95.05  | 100.00 | 100.00 |
| 5 %                                    | 100.00 | 100.00 | 100.00 | 100.00  | 88.45  | 100.00 | 99.95  |
| 1 %                                    | 100.00 | 100.00 | 100.00 | 100.00  | 64.30  | 100.00 | 99.75  |
| $\theta = (1, 1)$                      |        |        |        |         |        |        |        |
| 10 %                                   | 100.00 | 100.00 | 100.00 | 100.00  | 83.00  | 100.00 | 100.00 |
| 5 %                                    | 100.00 | 100.00 | 100.00 | 100.00  | 71.00  | 100.00 | 99.75  |
| 1 %                                    | 100.00 | 100.00 | 100.00 | 100.00  | 39.95  | 100.00 | 99.15  |
| $\theta = (1.5, 1)$                    |        |        |        |         |        |        |        |
| 10 %                                   | 99.95  | 100.00 | 100.00 | 100.00  | 28.50  | 98.10  | 99.30  |
| 5 %                                    | 99.70  | 99.80  | 99.80  | 100.00  | 17.70  | 94.40  | 98.65  |
| 1 %                                    | 93.80  | 93.65  | 93.45  | 100.00  | 5.20   | 73.50  | 93.40  |
| $\theta = (3, 1)$                      |        |        |        |         |        |        |        |
| 10 %                                   | 21.20  | 21.05  | 20.95  | 44.70   | 10.70  | 21.85  | 55.45  |
| 5 %                                    | 12.00  | 11.95  | 11.50  | 31.70   | 4.95   | 11.40  | 44.05  |
| 1 %                                    | 3.35   | 3.60   | 3.40   | 14.20   | 1.00   | 2.35   | 24.80  |

| Adaptive length-scale                  |        |        |        |         |        |        |        |
|----------------------------------------|--------|--------|--------|---------|--------|--------|--------|
| Sample size $n = 200$ ; $\gamma = 1/2$ |        |        |        |         |        |        |        |
|                                        | MW1    | MW2    | MW3    | Pearson | LR1    | LR2    | WLR    |
| $\theta = (0.5, 1)$                    |        |        |        |         |        |        |        |
| 10 %                                   | 100.00 | 100.00 | 100.00 | 100.00  | 100.00 | 100.00 | 100.00 |
| 5 %                                    | 100.00 | 100.00 | 100.00 | 100.00  | 100.00 | 100.00 | 100.00 |
| 1 %                                    | 100.00 | 100.00 | 100.00 | 100.00  | 100.00 | 100.00 | 100.00 |
| $\theta = (0.7, 1)$                    |        |        |        |         |        |        |        |
| 10 %                                   | 100.00 | 100.00 | 100.00 | 100.00  | 100.00 | 100.00 | 100.00 |
| 5 %                                    | 100.00 | 100.00 | 100.00 | 100.00  | 99.90  | 100.00 | 100.00 |
| 1 %                                    | 100.00 | 100.00 | 100.00 | 100.00  | 98.80  | 100.00 | 100.00 |
| $\theta = (0.9, 1)$                    |        |        |        |         |        |        |        |
| 10 %                                   | 100.00 | 100.00 | 100.00 | 100.00  | 95.05  | 100.00 | 100.00 |
| 5 %                                    | 100.00 | 100.00 | 100.00 | 100.00  | 88.45  | 100.00 | 99.95  |
| 1 %                                    | 100.00 | 100.00 | 100.00 | 100.00  | 64.30  | 100.00 | 99.75  |
| $\theta = (1, 1)$                      |        |        |        |         |        |        |        |
| 10 %                                   | 100.00 | 100.00 | 100.00 | 100.00  | 83.00  | 100.00 | 100.00 |
| 5 %                                    | 100.00 | 100.00 | 100.00 | 100.00  | 71.00  | 100.00 | 99.95  |
| 1 %                                    | 100.00 | 100.00 | 100.00 | 100.00  | 39.95  | 100.00 | 99.30  |
| $\theta = (1.5, 1)$                    |        |        |        |         |        |        |        |
| 10 %                                   | 100.00 | 100.00 | 100.00 | 100.00  | 28.50  | 98.10  | 99.25  |
| 5 %                                    | 100.00 | 100.00 | 100.00 | 100.00  | 17.70  | 94.40  | 98.05  |
| 1 %                                    | 100.00 | 100.00 | 100.00 | 100.00  | 5.20   | 73.50  | 90.55  |
| $\theta = (3, 1)$                      |        |        |        |         |        |        |        |
| 10 %                                   | 98.20  | 98.35  | 98.30  | 44.70   | 10.70  | 21.85  | 44.35  |
| 5 %                                    | 89.75  | 89.95  | 89.85  | 31.70   | 4.95   | 11.40  | 31.45  |
| 1 %                                    | 48.90  | 48.00  | 47.85  | 14.20   | 1.00   | 2.35   | 12.85  |



4.1.10 Sample size 200; Censoring distribution  $G_2(t) = 1 - e^{-2t}$

| Fixed length-scale 1              |        |        |        |         |        |        |        |
|-----------------------------------|--------|--------|--------|---------|--------|--------|--------|
| Sample size $n = 200; \gamma = 2$ |        |        |        |         |        |        |        |
|                                   | MW1    | MW2    | MW3    | Pearson | LR1    | LR2    | WLR    |
| $\theta = (0.5, 1)$               |        |        |        |         |        |        |        |
| 10 %                              | 100.00 | 100.00 | 100.00 | 100.00  | 100.00 | 100.00 | 100.00 |
| 5 %                               | 100.00 | 100.00 | 100.00 | 100.00  | 100.00 | 100.00 | 100.00 |
| 1 %                               | 100.00 | 100.00 | 100.00 | 100.00  | 100.00 | 100.00 | 100.00 |
| $\theta = (0.7, 1)$               |        |        |        |         |        |        |        |
| 10 %                              | 100.00 | 100.00 | 100.00 | 100.00  | 100.00 | 100.00 | 100.00 |
| 5 %                               | 100.00 | 100.00 | 100.00 | 100.00  | 100.00 | 100.00 | 100.00 |
| 1 %                               | 100.00 | 100.00 | 100.00 | 100.00  | 100.00 | 100.00 | 100.00 |
| $\theta = (0.9, 1)$               |        |        |        |         |        |        |        |
| 10 %                              | 100.00 | 100.00 | 100.00 | 100.00  | 100.00 | 100.00 | 99.95  |
| 5 %                               | 100.00 | 100.00 | 100.00 | 100.00  | 100.00 | 100.00 | 99.75  |
| 1 %                               | 100.00 | 100.00 | 100.00 | 100.00  | 99.90  | 100.00 | 98.25  |
| $\theta = (1, 1)$                 |        |        |        |         |        |        |        |
| 10 %                              | 100.00 | 100.00 | 100.00 | 100.00  | 99.95  | 100.00 | 99.60  |
| 5 %                               | 100.00 | 100.00 | 100.00 | 100.00  | 99.90  | 100.00 | 98.50  |
| 1 %                               | 100.00 | 100.00 | 100.00 | 100.00  | 98.95  | 100.00 | 91.00  |
| $\theta = (1.5, 1)$               |        |        |        |         |        |        |        |
| 10 %                              | 100.00 | 100.00 | 100.00 | 100.00  | 84.75  | 100.00 | 75.60  |
| 5 %                               | 99.95  | 100.00 | 100.00 | 100.00  | 72.50  | 100.00 | 59.05  |
| 1 %                               | 99.75  | 99.70  | 99.70  | 99.95   | 43.70  | 99.90  | 26.90  |
| $\theta = (3, 1)$                 |        |        |        |         |        |        |        |
| 10 %                              | 44.65  | 44.90  | 44.65  | 56.40   | 18.65  | 74.90  | 27.45  |
| 5 %                               | 31.45  | 31.70  | 30.95  | 44.05   | 10.35  | 56.80  | 16.95  |
| 1 %                               | 13.30  | 13.50  | 13.15  | 22.45   | 2.20   | 22.15  | 6.20   |

| Adaptive length-scale             |        |        |        |         |        |        |        |
|-----------------------------------|--------|--------|--------|---------|--------|--------|--------|
| Sample size $n = 200; \gamma = 2$ |        |        |        |         |        |        |        |
|                                   | MW1    | MW2    | MW3    | Pearson | LR1    | LR2    | WLR    |
| $\theta = (0.5, 1)$               |        |        |        |         |        |        |        |
| 10 %                              | 100.00 | 100.00 | 100.00 | 100.00  | 100.00 | 100.00 | 100.00 |
| 5 %                               | 100.00 | 100.00 | 100.00 | 100.00  | 100.00 | 100.00 | 100.00 |
| 1 %                               | 100.00 | 100.00 | 100.00 | 100.00  | 100.00 | 100.00 | 100.00 |
| $\theta = (0.7, 1)$               |        |        |        |         |        |        |        |
| 10 %                              | 100.00 | 100.00 | 100.00 | 100.00  | 100.00 | 100.00 | 100.00 |
| 5 %                               | 100.00 | 100.00 | 100.00 | 100.00  | 100.00 | 100.00 | 100.00 |
| 1 %                               | 100.00 | 100.00 | 100.00 | 100.00  | 100.00 | 100.00 | 100.00 |
| $\theta = (0.9, 1)$               |        |        |        |         |        |        |        |
| 10 %                              | 100.00 | 100.00 | 100.00 | 100.00  | 100.00 | 100.00 | 99.95  |
| 5 %                               | 100.00 | 100.00 | 100.00 | 100.00  | 100.00 | 100.00 | 99.75  |
| 1 %                               | 100.00 | 100.00 | 100.00 | 100.00  | 99.90  | 100.00 | 98.25  |
| $\theta = (1, 1)$                 |        |        |        |         |        |        |        |
| 10 %                              | 100.00 | 100.00 | 100.00 | 100.00  | 99.95  | 100.00 | 99.80  |
| 5 %                               | 100.00 | 100.00 | 100.00 | 100.00  | 99.90  | 100.00 | 98.70  |
| 1 %                               | 100.00 | 100.00 | 100.00 | 100.00  | 98.95  | 100.00 | 92.35  |
| $\theta = (1.5, 1)$               |        |        |        |         |        |        |        |
| 10 %                              | 100.00 | 100.00 | 100.00 | 100.00  | 84.75  | 100.00 | 79.45  |
| 5 %                               | 100.00 | 100.00 | 100.00 | 100.00  | 72.50  | 100.00 | 65.70  |
| 1 %                               | 100.00 | 100.00 | 100.00 | 99.95   | 43.70  | 99.90  | 30.70  |
| $\theta = (3, 1)$                 |        |        |        |         |        |        |        |
| 10 %                              | 100.00 | 100.00 | 100.00 | 56.40   | 18.65  | 74.90  | 24.00  |
| 5 %                               | 99.95  | 99.95  | 99.95  | 44.05   | 10.35  | 56.80  | 15.10  |
| 1 %                               | 96.45  | 96.45  | 97.05  | 22.45   | 2.20   | 22.15  | 5.55   |

## 5 Weibull hazard functions

Let  $\theta_w = (\theta_{w1}, \theta_{w2}) \in \mathbb{R}_+^2$ . We consider the hazard functions  $\lambda_{\theta_w} = \theta_{w1}/\theta_{w2}(t/\theta_{w2})^{\theta_{w1}-1}$  for fixed  $\theta_{w2} = 1$  and  $\theta_{w1} \in \{0.5, 1, 1.5, 2, 3\}$ . For this model, the null hypothesis is recovered when  $\theta_w = (1, 1)$  (shown in pink).

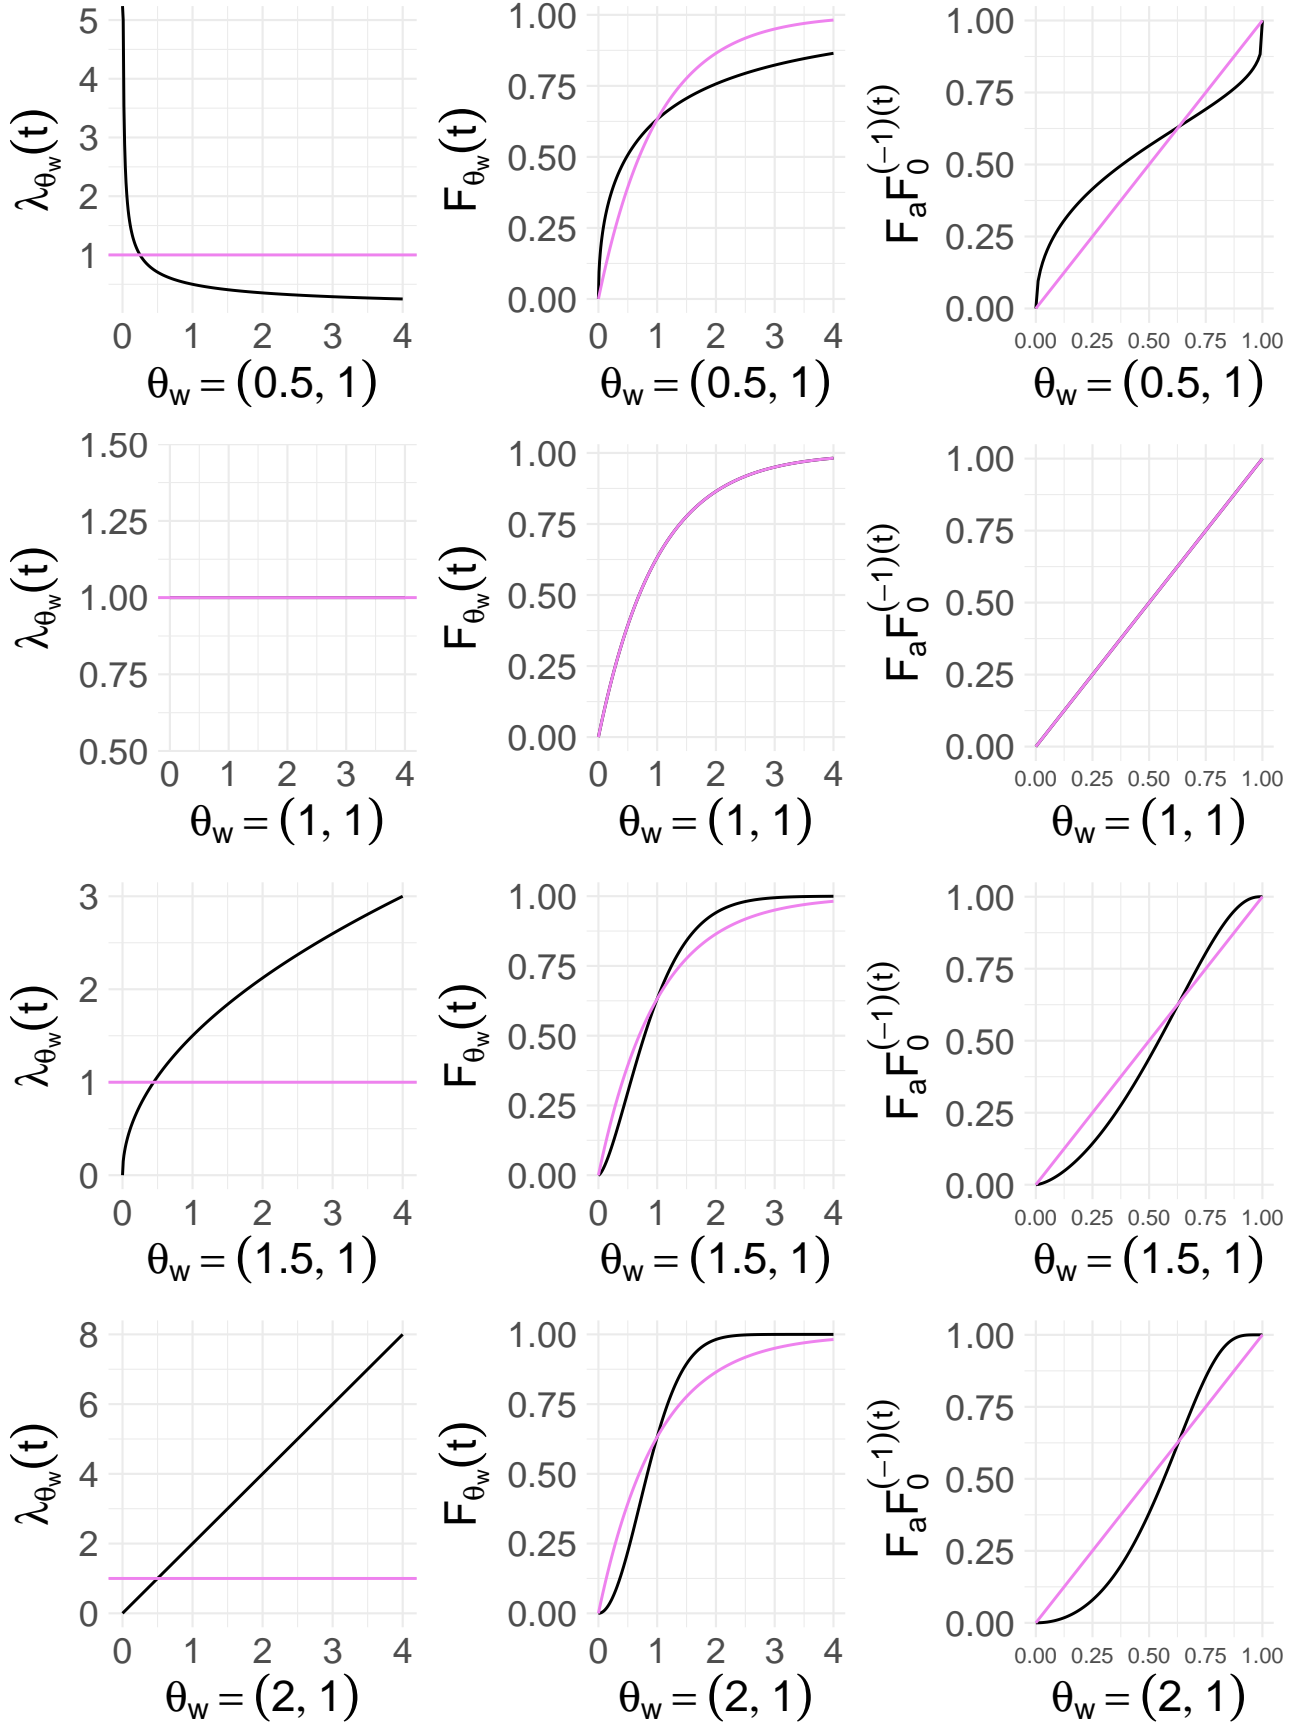

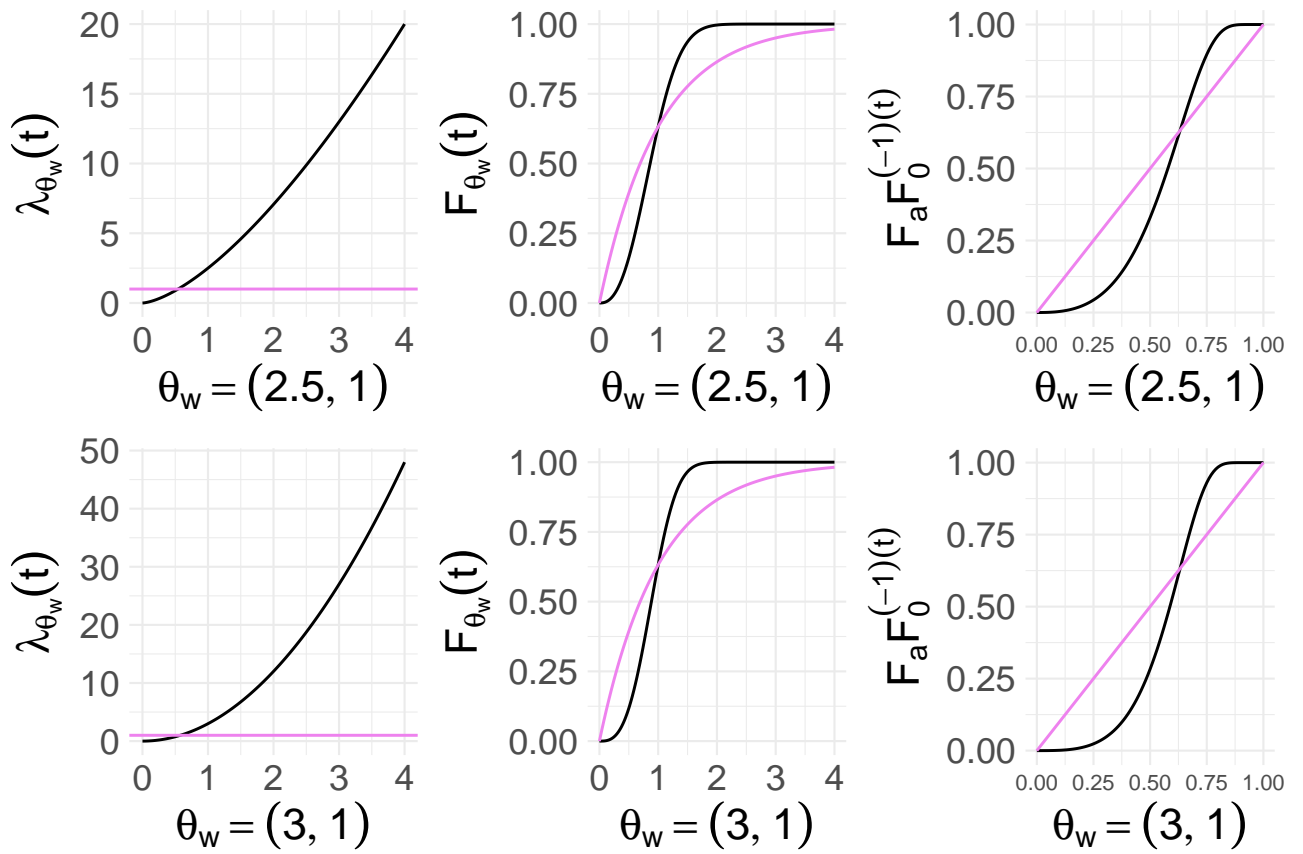

In red we observe tests that have an clear incorrect level. In orange, we observe tests that have a questionable incorrect level.

5.0.1 Sample size 30; Censoring percentage 30%

| Weibull hazard functions                                   |       |       |       |         |       |       |       |
|------------------------------------------------------------|-------|-------|-------|---------|-------|-------|-------|
| Sample size $n = 30$ ; Censoring 30%; Fixed length-scale 1 |       |       |       |         |       |       |       |
|                                                            | MW1   | MW2   | MW3   | Pearson | LR1   | LR2   | WLR   |
| $\theta_w = (0.5, 1)$                                      |       |       |       |         |       |       |       |
| 10 %                                                       | 40.40 | 43.85 | 40.55 | 70.25   | 28.55 | 71.30 | 70.55 |
| 5 %                                                        | 26.65 | 31.35 | 26.45 | 60.15   | 20.45 | 65.15 | 63.70 |
| 1 %                                                        | 7.75  | 12.75 | 8.05  | 42.05   | 9.60  | 51.80 | 52.55 |
| $\theta_w = (1, 1)$                                        |       |       |       |         |       |       |       |
| 10 %                                                       | 8.95  | 10.50 | 9.10  | 13.20   | 9.45  | 9.80  | 18.65 |
| 5 %                                                        | 4.65  | 6.05  | 4.80  | 8.85    | 5.10  | 5.20  | 13.30 |
| 1 %                                                        | 1.20  | 2.05  | 1.45  | 3.60    | 1.60  | 1.45  | 6.40  |
| $\theta_w = (1.5, 1)$                                      |       |       |       |         |       |       |       |
| 10 %                                                       | 25.95 | 28.90 | 26.10 | 52.20   | 3.65  | 8.45  | 33.40 |
| 5 %                                                        | 16.75 | 19.30 | 16.65 | 40.80   | 1.55  | 3.45  | 24.10 |
| 1 %                                                        | 5.30  | 7.80  | 5.35  | 21.10   | 0.05  | 0.25  | 11.55 |
| $\theta_w = (2, 1)$                                        |       |       |       |         |       |       |       |
| 10 %                                                       | 69.75 | 72.55 | 70.00 | 95.20   | 1.30  | 17.60 | 73.15 |
| 5 %                                                        | 53.45 | 57.85 | 53.55 | 89.65   | 0.45  | 5.95  | 63.10 |
| 1 %                                                        | 25.65 | 30.15 | 25.45 | 72.95   | 0.00  | 0.20  | 42.00 |
| $\theta_w = (2.5, 1)$                                      |       |       |       |         |       |       |       |
| 10 %                                                       | 95.05 | 95.70 | 95.25 | 99.90   | 0.55  | 28.45 | 95.75 |
| 5 %                                                        | 87.60 | 89.90 | 87.75 | 99.80   | 0.00  | 9.40  | 92.80 |
| 1 %                                                        | 63.20 | 69.10 | 63.75 | 98.20   | 0.00  | 0.30  | 80.35 |
| $\theta_w = (3, 1)$                                        |       |       |       |         |       |       |       |
| 10 %                                                       | 99.90 | 99.90 | 99.85 | 100.00  | 0.05  | 43.40 | 99.55 |
| 5 %                                                        | 98.90 | 99.25 | 98.75 | 100.00  | 0.00  | 16.30 | 99.00 |
| 1 %                                                        | 89.60 | 91.40 | 89.50 | 99.90   | 0.00  | 0.45  | 96.20 |

| Weibull hazard functions                                    |        |        |        |         |       |       |       |
|-------------------------------------------------------------|--------|--------|--------|---------|-------|-------|-------|
| Sample size $n = 30$ ; Censoring 30%; Adaptive length-scale |        |        |        |         |       |       |       |
|                                                             | MW1    | MW2    | MW3    | Pearson | LR1   | LR2   | WLR   |
| $\theta_w = (0.5, 1)$                                       |        |        |        |         |       |       |       |
| 10 %                                                        | 67.20  | 70.70  | 67.30  | 70.25   | 28.55 | 71.30 | 70.55 |
| 5 %                                                         | 52.30  | 56.10  | 52.15  | 60.15   | 20.45 | 65.15 | 63.70 |
| 1 %                                                         | 21.95  | 29.40  | 21.95  | 42.05   | 9.60  | 51.80 | 52.55 |
| $\theta_w = (1, 1)$                                         |        |        |        |         |       |       |       |
| 10 %                                                        | 9.25   | 10.25  | 8.95   | 13.20   | 9.45  | 9.80  | 18.65 |
| 5 %                                                         | 4.40   | 5.25   | 4.40   | 8.85    | 5.10  | 5.20  | 13.30 |
| 1 %                                                         | 0.85   | 1.50   | 0.95   | 3.60    | 1.60  | 1.45  | 6.40  |
| $\theta_w = (1.5, 1)$                                       |        |        |        |         |       |       |       |
| 10 %                                                        | 45.35  | 48.20  | 45.50  | 52.20   | 3.65  | 8.45  | 33.40 |
| 5 %                                                         | 32.50  | 35.80  | 32.05  | 40.80   | 1.55  | 3.45  | 24.10 |
| 1 %                                                         | 12.70  | 15.05  | 12.35  | 21.10   | 0.05  | 0.25  | 11.55 |
| $\theta_w = (2, 1)$                                         |        |        |        |         |       |       |       |
| 10 %                                                        | 92.75  | 93.45  | 92.50  | 95.20   | 1.30  | 17.60 | 73.15 |
| 5 %                                                         | 85.60  | 87.50  | 85.60  | 89.65   | 0.45  | 5.95  | 63.10 |
| 1 %                                                         | 61.25  | 65.55  | 60.15  | 72.95   | 0.00  | 0.20  | 42.00 |
| $\theta_w = (2.5, 1)$                                       |        |        |        |         |       |       |       |
| 10 %                                                        | 99.90  | 99.95  | 99.90  | 99.90   | 0.55  | 28.45 | 95.75 |
| 5 %                                                         | 99.65  | 99.75  | 99.60  | 99.80   | 0.00  | 9.40  | 92.80 |
| 1 %                                                         | 95.00  | 96.15  | 95.30  | 98.20   | 0.00  | 0.30  | 80.35 |
| $\theta_w = (3, 1)$                                         |        |        |        |         |       |       |       |
| 10 %                                                        | 100.00 | 100.00 | 100.00 | 100.00  | 0.05  | 43.40 | 99.55 |
| 5 %                                                         | 100.00 | 100.00 | 100.00 | 100.00  | 0.00  | 16.30 | 99.00 |
| 1 %                                                         | 99.80  | 99.95  | 99.85  | 99.90   | 0.00  | 0.45  | 96.20 |

**5.0.2 Sample size 30; Censoring percentage 50%**

| Weibull hazard functions                                   |       |       |       |               |       |       |              |
|------------------------------------------------------------|-------|-------|-------|---------------|-------|-------|--------------|
| Sample size $n = 30$ ; Censoring 50%; Fixed length-scale 1 |       |       |       |               |       |       |              |
|                                                            | MW1   | MW2   | MW3   | Pearson       | LR1   | LR2   | WLR          |
| $\theta_w = (0.5, 1)$                                      |       |       |       |               |       |       |              |
| 10 %                                                       | 51.00 | 54.40 | 51.00 | <b>61.95</b>  | 51.30 | 85.05 | <b>63.80</b> |
| 5 %                                                        | 36.05 | 41.35 | 36.00 | <b>53.60</b>  | 42.35 | 80.60 | <b>57.50</b> |
| 1 %                                                        | 13.15 | 19.95 | 13.10 | <b>37.25</b>  | 27.10 | 68.40 | <b>47.15</b> |
| $\theta_w = (1, 1)$                                        |       |       |       |               |       |       |              |
| 10 %                                                       | 9.25  | 10.80 | 9.20  | <b>14.35</b>  | 9.50  | 9.75  | <b>16.70</b> |
| 5 %                                                        | 4.45  | 5.95  | 4.25  | <b>10.05</b>  | 4.85  | 5.20  | <b>11.05</b> |
| 1 %                                                        | 1.00  | 1.85  | 1.10  | <b>5.35</b>   | 1.10  | 1.10  | <b>6.20</b>  |
| $\theta_w = (1.5, 1)$                                      |       |       |       |               |       |       |              |
| 10 %                                                       | 29.35 | 31.75 | 29.30 | <b>44.30</b>  | 3.60  | 15.10 | <b>20.65</b> |
| 5 %                                                        | 19.05 | 22.15 | 18.90 | <b>32.25</b>  | 1.30  | 6.50  | <b>14.20</b> |
| 1 %                                                        | 6.95  | 9.95  | 7.05  | <b>16.70</b>  | 0.20  | 0.70  | <b>8.05</b>  |
| $\theta_w = (2, 1)$                                        |       |       |       |               |       |       |              |
| 10 %                                                       | 69.95 | 72.60 | 69.80 | <b>86.25</b>  | 0.90  | 32.25 | <b>46.25</b> |
| 5 %                                                        | 54.20 | 58.50 | 54.60 | <b>77.10</b>  | 0.20  | 15.25 | <b>36.05</b> |
| 1 %                                                        | 28.35 | 34.10 | 27.75 | <b>54.40</b>  | 0.00  | 1.50  | <b>20.70</b> |
| $\theta_w = (2.5, 1)$                                      |       |       |       |               |       |       |              |
| 10 %                                                       | 93.80 | 94.95 | 93.85 | <b>99.15</b>  | 0.40  | 51.50 | <b>76.65</b> |
| 5 %                                                        | 86.80 | 88.90 | 86.50 | <b>98.30</b>  | 0.00  | 25.15 | <b>67.50</b> |
| 1 %                                                        | 62.95 | 69.00 | 62.50 | <b>91.20</b>  | 0.00  | 2.20  | <b>47.60</b> |
| $\theta_w = (3, 1)$                                        |       |       |       |               |       |       |              |
| 10 %                                                       | 99.75 | 99.85 | 99.80 | <b>100.00</b> | 0.10  | 68.00 | <b>92.45</b> |
| 5 %                                                        | 98.15 | 98.75 | 98.25 | <b>99.85</b>  | 0.00  | 37.20 | <b>87.40</b> |
| 1 %                                                        | 88.65 | 91.35 | 88.55 | <b>98.90</b>  | 0.00  | 3.25  | <b>74.65</b> |

| Weibull hazard functions                                    |        |        |        |               |       |       |              |
|-------------------------------------------------------------|--------|--------|--------|---------------|-------|-------|--------------|
| Sample size $n = 30$ ; Censoring 50%; Adaptive length-scale |        |        |        |               |       |       |              |
|                                                             | MW1    | MW2    | MW3    | Pearson       | LR1   | LR2   | WLR          |
| $\theta_w = (0.5, 1)$                                       |        |        |        |               |       |       |              |
| 10 %                                                        | 68.20  | 70.85  | 67.95  | <b>61.95</b>  | 51.30 | 85.05 | <b>63.80</b> |
| 5 %                                                         | 52.20  | 56.40  | 52.10  | <b>53.60</b>  | 42.35 | 80.60 | <b>57.50</b> |
| 1 %                                                         | 21.00  | 29.20  | 21.40  | <b>37.25</b>  | 27.10 | 68.40 | <b>47.15</b> |
| $\theta_w = (1, 1)$                                         |        |        |        |               |       |       |              |
| 10 %                                                        | 8.85   | 10.20  | 8.85   | <b>14.35</b>  | 9.50  | 9.75  | <b>16.70</b> |
| 5 %                                                         | 4.30   | 5.35   | 4.25   | <b>10.05</b>  | 4.85  | 5.20  | <b>11.05</b> |
| 1 %                                                         | 0.65   | 1.15   | 0.60   | <b>5.35</b>   | 1.10  | 1.10  | <b>6.20</b>  |
| $\theta_w = (1.5, 1)$                                       |        |        |        |               |       |       |              |
| 10 %                                                        | 41.60  | 44.25  | 41.65  | <b>44.30</b>  | 3.60  | 15.10 | <b>20.65</b> |
| 5 %                                                         | 29.70  | 32.35  | 29.80  | <b>32.25</b>  | 1.30  | 6.50  | <b>14.20</b> |
| 1 %                                                         | 11.60  | 13.15  | 11.50  | <b>16.70</b>  | 0.20  | 0.70  | <b>8.05</b>  |
| $\theta_w = (2, 1)$                                         |        |        |        |               |       |       |              |
| 10 %                                                        | 87.65  | 88.75  | 87.50  | <b>86.25</b>  | 0.90  | 32.25 | <b>46.25</b> |
| 5 %                                                         | 78.90  | 80.55  | 78.75  | <b>77.10</b>  | 0.20  | 15.25 | <b>36.05</b> |
| 1 %                                                         | 53.05  | 56.95  | 53.65  | <b>54.40</b>  | 0.00  | 1.50  | <b>20.70</b> |
| $\theta_w = (2.5, 1)$                                       |        |        |        |               |       |       |              |
| 10 %                                                        | 99.75  | 99.85  | 99.80  | <b>99.15</b>  | 0.40  | 51.50 | <b>76.65</b> |
| 5 %                                                         | 98.65  | 99.20  | 98.75  | <b>98.30</b>  | 0.00  | 25.15 | <b>67.50</b> |
| 1 %                                                         | 89.35  | 91.05  | 89.30  | <b>91.20</b>  | 0.00  | 2.20  | <b>47.60</b> |
| $\theta_w = (3, 1)$                                         |        |        |        |               |       |       |              |
| 10 %                                                        | 100.00 | 100.00 | 100.00 | <b>100.00</b> | 0.10  | 68.00 | <b>92.45</b> |
| 5 %                                                         | 100.00 | 100.00 | 100.00 | <b>99.85</b>  | 0.00  | 37.20 | <b>87.40</b> |
| 1 %                                                         | 99.60  | 99.60  | 99.60  | <b>98.90</b>  | 0.00  | 3.25  | <b>74.65</b> |

**5.0.3 Sample size 50; Censoring percentage 30%**

| Weibull hazard functions                                   |        |        |        |         |       |       |        |
|------------------------------------------------------------|--------|--------|--------|---------|-------|-------|--------|
| Sample size $n = 50$ ; Censoring 30%; Fixed length-scale 1 |        |        |        |         |       |       |        |
|                                                            | MW1    | MW2    | MW3    | Pearson | LR1   | LR2   | WLR    |
| $\theta_w = (0.5, 1)$                                      |        |        |        |         |       |       |        |
| 10 %                                                       | 61.40  | 63.10  | 61.10  | 90.35   | 30.15 | 85.95 | 83.95  |
| 5 %                                                        | 46.40  | 49.25  | 46.00  | 84.60   | 22.75 | 81.10 | 78.05  |
| 1 %                                                        | 20.95  | 25.00  | 20.85  | 68.05   | 12.65 | 68.45 | 67.00  |
| $\theta_w = (1, 1)$                                        |        |        |        |         |       |       |        |
| 10 %                                                       | 8.85   | 9.40   | 8.70   | 11.55   | 9.60  | 9.05  | 15.80  |
| 5 %                                                        | 4.45   | 5.15   | 4.30   | 6.40    | 4.40  | 4.65  | 9.25   |
| 1 %                                                        | 1.05   | 1.55   | 1.05   | 2.05    | 1.00  | 1.05  | 3.65   |
| $\theta_w = (1.5, 1)$                                      |        |        |        |         |       |       |        |
| 10 %                                                       | 38.10  | 39.80  | 38.15  | 74.90   | 3.55  | 14.85 | 45.95  |
| 5 %                                                        | 24.80  | 26.85  | 24.95  | 62.90   | 1.20  | 6.20  | 34.80  |
| 1 %                                                        | 8.30   | 10.00  | 8.70   | 38.30   | 0.05  | 1.00  | 18.10  |
| $\theta_w = (2, 1)$                                        |        |        |        |         |       |       |        |
| 10 %                                                       | 91.50  | 92.40  | 91.35  | 99.85   | 1.10  | 40.65 | 94.40  |
| 5 %                                                        | 80.80  | 82.20  | 80.55  | 99.40   | 0.20  | 19.60 | 88.95  |
| 1 %                                                        | 49.75  | 54.45  | 50.50  | 96.80   | 0.00  | 2.20  | 73.20  |
| $\theta_w = (2.5, 1)$                                      |        |        |        |         |       |       |        |
| 10 %                                                       | 100.00 | 99.95  | 99.95  | 100.00  | 0.65  | 66.90 | 99.70  |
| 5 %                                                        | 99.15  | 99.45  | 99.30  | 100.00  | 0.05  | 40.80 | 99.65  |
| 1 %                                                        | 92.35  | 93.25  | 92.25  | 100.00  | 0.00  | 4.80  | 98.15  |
| $\theta_w = (3, 1)$                                        |        |        |        |         |       |       |        |
| 10 %                                                       | 100.00 | 100.00 | 100.00 | 100.00  | 0.10  | 87.35 | 100.00 |
| 5 %                                                        | 100.00 | 100.00 | 100.00 | 100.00  | 0.00  | 62.30 | 99.95  |
| 1 %                                                        | 99.85  | 99.85  | 99.85  | 100.00  | 0.00  | 9.35  | 99.95  |

| Weibull hazard functions                                    |        |        |        |         |       |       |        |
|-------------------------------------------------------------|--------|--------|--------|---------|-------|-------|--------|
| Sample size $n = 50$ ; Censoring 30%; Adaptive length-scale |        |        |        |         |       |       |        |
|                                                             | MW1    | MW2    | MW3    | Pearson | LR1   | LR2   | WLR    |
| $\theta_w = (0.5, 1)$                                       |        |        |        |         |       |       |        |
| 10 %                                                        | 90.35  | 91.30  | 90.25  | 90.35   | 30.15 | 85.95 | 83.95  |
| 5 %                                                         | 81.95  | 84.20  | 82.50  | 84.60   | 22.75 | 81.10 | 78.05  |
| 1 %                                                         | 53.80  | 58.05  | 53.20  | 68.05   | 12.65 | 68.45 | 67.00  |
| $\theta_w = (1, 1)$                                         |        |        |        |         |       |       |        |
| 10 %                                                        | 8.50   | 9.05   | 8.45   | 11.55   | 9.60  | 9.05  | 15.80  |
| 5 %                                                         | 4.20   | 4.75   | 4.40   | 6.40    | 4.40  | 4.65  | 9.25   |
| 1 %                                                         | 1.05   | 1.25   | 1.05   | 2.05    | 1.00  | 1.05  | 3.65   |
| $\theta_w = (1.5, 1)$                                       |        |        |        |         |       |       |        |
| 10 %                                                        | 70.05  | 71.50  | 70.10  | 74.90   | 3.55  | 14.85 | 45.95  |
| 5 %                                                         | 54.70  | 57.60  | 55.70  | 62.90   | 1.20  | 6.20  | 34.80  |
| 1 %                                                         | 27.05  | 29.40  | 27.70  | 38.30   | 0.05  | 1.00  | 18.10  |
| $\theta_w = (2, 1)$                                         |        |        |        |         |       |       |        |
| 10 %                                                        | 99.60  | 99.70  | 99.60  | 99.85   | 1.10  | 40.65 | 94.40  |
| 5 %                                                         | 98.85  | 99.00  | 98.95  | 99.40   | 0.20  | 19.60 | 88.95  |
| 1 %                                                         | 92.75  | 93.35  | 92.75  | 96.80   | 0.00  | 2.20  | 73.20  |
| $\theta_w = (2.5, 1)$                                       |        |        |        |         |       |       |        |
| 10 %                                                        | 100.00 | 100.00 | 100.00 | 100.00  | 0.65  | 66.90 | 99.70  |
| 5 %                                                         | 100.00 | 100.00 | 100.00 | 100.00  | 0.05  | 40.80 | 99.65  |
| 1 %                                                         | 99.95  | 99.95  | 99.95  | 100.00  | 0.00  | 4.80  | 98.15  |
| $\theta_w = (3, 1)$                                         |        |        |        |         |       |       |        |
| 10 %                                                        | 100.00 | 100.00 | 100.00 | 100.00  | 0.10  | 87.35 | 100.00 |
| 5 %                                                         | 100.00 | 100.00 | 100.00 | 100.00  | 0.00  | 62.30 | 99.95  |
| 1 %                                                         | 100.00 | 100.00 | 100.00 | 100.00  | 0.00  | 9.35  | 99.95  |

**5.0.4 Sample size 50; Censoring percentage 50%**

| Weibull hazard functions                                   |        |        |        |         |       |       |       |
|------------------------------------------------------------|--------|--------|--------|---------|-------|-------|-------|
| Sample size $n = 50$ ; Censoring 50%; Fixed length-scale 1 |        |        |        |         |       |       |       |
|                                                            | MW1    | MW2    | MW3    | Pearson | LR1   | LR2   | WLR   |
| $\theta_w = (0.5, 1)$                                      |        |        |        |         |       |       |       |
| 10 %                                                       | 74.05  | 75.60  | 74.10  | 82.40   | 64.50 | 95.30 | 76.65 |
| 5 %                                                        | 61.05  | 63.30  | 60.85  | 75.75   | 55.75 | 93.00 | 70.55 |
| 1 %                                                        | 31.15  | 36.15  | 30.65  | 58.65   | 37.00 | 85.75 | 57.85 |
| $\theta_w = (1, 1)$                                        |        |        |        |         |       |       |       |
| 10 %                                                       | 8.40   | 9.30   | 8.45   | 14.35   | 9.15  | 9.60  | 15.70 |
| 5 %                                                        | 4.45   | 5.20   | 4.50   | 9.60    | 4.90  | 5.05  | 10.15 |
| 1 %                                                        | 1.10   | 1.65   | 1.10   | 4.85    | 1.20  | 1.20  | 4.90  |
| $\theta_w = (1.5, 1)$                                      |        |        |        |         |       |       |       |
| 10 %                                                       | 41.95  | 43.00  | 41.40  | 60.60   | 3.45  | 26.85 | 24.15 |
| 5 %                                                        | 28.20  | 30.60  | 28.35  | 49.40   | 1.20  | 14.35 | 17.15 |
| 1 %                                                        | 11.20  | 13.95  | 11.25  | 27.05   | 0.10  | 2.15  | 8.40  |
| $\theta_w = (2, 1)$                                        |        |        |        |         |       |       |       |
| 10 %                                                       | 90.20  | 91.25  | 90.40  | 98.60   | 1.10  | 63.95 | 67.90 |
| 5 %                                                        | 81.45  | 82.40  | 80.80  | 96.65   | 0.25  | 41.70 | 57.05 |
| 1 %                                                        | 54.10  | 58.05  | 54.30  | 88.30   | 0.05  | 8.60  | 36.65 |
| $\theta_w = (2.5, 1)$                                      |        |        |        |         |       |       |       |
| 10 %                                                       | 99.90  | 99.90  | 99.90  | 100.00  | 0.20  | 87.25 | 94.40 |
| 5 %                                                        | 98.80  | 99.20  | 98.85  | 99.95   | 0.05  | 69.05 | 90.05 |
| 1 %                                                        | 91.60  | 92.85  | 91.10  | 99.75   | 0.00  | 18.60 | 77.40 |
| $\theta_w = (3, 1)$                                        |        |        |        |         |       |       |       |
| 10 %                                                       | 100.00 | 100.00 | 100.00 | 100.00  | 0.00  | 96.90 | 99.35 |
| 5 %                                                        | 100.00 | 100.00 | 100.00 | 100.00  | 0.00  | 86.95 | 98.75 |
| 1 %                                                        | 99.70  | 99.95  | 99.75  | 100.00  | 0.00  | 34.00 | 95.30 |

| Weibull hazard functions                                    |        |        |        |         |       |       |       |
|-------------------------------------------------------------|--------|--------|--------|---------|-------|-------|-------|
| Sample size $n = 50$ ; Censoring 50%; Adaptive length-scale |        |        |        |         |       |       |       |
|                                                             | MW1    | MW2    | MW3    | Pearson | LR1   | LR2   | WLR   |
| $\theta_w = (0.5, 1)$                                       |        |        |        |         |       |       |       |
| 10 %                                                        | 89.80  | 90.60  | 89.75  | 82.40   | 64.50 | 95.30 | 76.65 |
| 5 %                                                         | 81.15  | 82.55  | 81.50  | 75.75   | 55.75 | 93.00 | 70.55 |
| 1 %                                                         | 53.80  | 59.45  | 52.95  | 58.65   | 37.00 | 85.75 | 57.85 |
| $\theta_w = (1, 1)$                                         |        |        |        |         |       |       |       |
| 10 %                                                        | 8.35   | 8.90   | 8.35   | 14.35   | 9.15  | 9.60  | 15.70 |
| 5 %                                                         | 4.15   | 4.65   | 4.05   | 9.60    | 4.90  | 5.05  | 10.15 |
| 1 %                                                         | 0.95   | 1.20   | 1.00   | 4.85    | 1.20  | 1.20  | 4.90  |
| $\theta_w = (1.5, 1)$                                       |        |        |        |         |       |       |       |
| 10 %                                                        | 62.90  | 64.20  | 62.75  | 60.60   | 3.45  | 26.85 | 24.15 |
| 5 %                                                         | 49.25  | 50.85  | 49.20  | 49.40   | 1.20  | 14.35 | 17.15 |
| 1 %                                                         | 24.20  | 25.95  | 24.35  | 27.05   | 0.10  | 2.15  | 8.40  |
| $\theta_w = (2, 1)$                                         |        |        |        |         |       |       |       |
| 10 %                                                        | 98.65  | 98.80  | 98.65  | 98.60   | 1.10  | 63.95 | 67.90 |
| 5 %                                                         | 97.50  | 97.60  | 97.30  | 96.65   | 0.25  | 41.70 | 57.05 |
| 1 %                                                         | 86.85  | 87.90  | 86.95  | 88.30   | 0.05  | 8.60  | 36.65 |
| $\theta_w = (2.5, 1)$                                       |        |        |        |         |       |       |       |
| 10 %                                                        | 100.00 | 100.00 | 100.00 | 100.00  | 0.20  | 87.25 | 94.40 |
| 5 %                                                         | 100.00 | 100.00 | 100.00 | 99.95   | 0.05  | 69.05 | 90.05 |
| 1 %                                                         | 99.75  | 99.85  | 99.85  | 99.75   | 0.00  | 18.60 | 77.40 |
| $\theta_w = (3, 1)$                                         |        |        |        |         |       |       |       |
| 10 %                                                        | 100.00 | 100.00 | 100.00 | 100.00  | 0.00  | 96.90 | 99.35 |
| 5 %                                                         | 100.00 | 100.00 | 100.00 | 100.00  | 0.00  | 86.95 | 98.75 |
| 1 %                                                         | 100.00 | 100.00 | 100.00 | 100.00  | 0.00  | 34.00 | 95.30 |

**5.0.5 Sample size 100; Censoring percentage 30%**

| Weibull hazard functions                                    |        |        |        |         |       |       |        |
|-------------------------------------------------------------|--------|--------|--------|---------|-------|-------|--------|
| Sample size $n = 100$ ; Censoring 30%; Fixed length-scale 1 |        |        |        |         |       |       |        |
|                                                             | MW1    | MW2    | MW3    | Pearson | LR1   | LR2   | WLR    |
| $\theta_w = (0.5, 1)$                                       |        |        |        |         |       |       |        |
| 10 %                                                        | 89.10  | 89.70  | 89.20  | 99.60   | 36.30 | 97.20 | 97.15  |
| 5 %                                                         | 77.30  | 78.25  | 76.75  | 99.00   | 28.45 | 95.55 | 95.20  |
| 1%                                                          | 52.00  | 55.40  | 53.10  | 96.45   | 16.30 | 90.00 | 89.25  |
| $\theta_w = (1, 1)$                                         |        |        |        |         |       |       |        |
| 10 %                                                        | 9.90   | 10.40  | 9.95   | 10.00   | 10.45 | 10.10 | 13.00  |
| 5 %                                                         | 5.30   | 5.45   | 5.05   | 5.45    | 5.95  | 5.80  | 7.30   |
| 1%                                                          | 1.15   | 1.30   | 1.00   | 1.80    | 1.30  | 1.30  | 3.05   |
| $\theta_w = (1.5, 1)$                                       |        |        |        |         |       |       |        |
| 10 %                                                        | 69.95  | 70.70  | 69.55  | 97.10   | 5.00  | 39.10 | 79.05  |
| 5 %                                                         | 52.30  | 54.05  | 51.80  | 94.20   | 2.35  | 23.25 | 66.85  |
| 1%                                                          | 25.45  | 27.15  | 25.25  | 81.70   | 0.25  | 4.80  | 44.25  |
| $\theta_w = (2, 1)$                                         |        |        |        |         |       |       |        |
| 10 %                                                        | 99.85  | 99.85  | 99.85  | 100.00  | 3.35  | 85.30 | 99.95  |
| 5 %                                                         | 99.35  | 99.35  | 99.30  | 100.00  | 0.80  | 68.50 | 99.85  |
| 1%                                                          | 93.20  | 94.10  | 93.00  | 99.95   | 0.00  | 25.70 | 98.60  |
| $\theta_w = (2.5, 1)$                                       |        |        |        |         |       |       |        |
| 10 %                                                        | 100.00 | 100.00 | 100.00 | 100.00  | 1.35  | 98.85 | 100.00 |
| 5 %                                                         | 100.00 | 100.00 | 100.00 | 100.00  | 0.35  | 94.05 | 100.00 |
| 1%                                                          | 100.00 | 99.95  | 99.95  | 100.00  | 0.00  | 59.35 | 100.00 |
| $\theta_w = (3, 1)$                                         |        |        |        |         |       |       |        |
| 10 %                                                        | 100.00 | 100.00 | 100.00 | 100.00  | 0.35  | 99.95 | 100.00 |
| 5 %                                                         | 100.00 | 100.00 | 100.00 | 100.00  | 0.05  | 99.90 | 100.00 |
| 1%                                                          | 100.00 | 100.00 | 100.00 | 100.00  | 0.00  | 87.25 | 100.00 |

| Weibull hazard functions                                     |        |        |        |         |       |       |        |
|--------------------------------------------------------------|--------|--------|--------|---------|-------|-------|--------|
| Sample size $n = 100$ ; Censoring 30%; Adaptive length-scale |        |        |        |         |       |       |        |
|                                                              | MW1    | MW2    | MW3    | Pearson | LR1   | LR2   | WLR    |
| $\theta_w = (0.5, 1)$                                        |        |        |        |         |       |       |        |
| 10 %                                                         | 99.85  | 99.90  | 99.90  | 99.60   | 36.30 | 97.20 | 97.15  |
| 5 %                                                          | 99.50  | 99.65  | 99.45  | 99.00   | 28.45 | 95.55 | 95.20  |
| 1%                                                           | 95.20  | 95.25  | 94.95  | 96.45   | 16.30 | 90.00 | 89.25  |
| $\theta_w = (1, 1)$                                          |        |        |        |         |       |       |        |
| 10 %                                                         | 9.50   | 10.05  | 9.70   | 10.00   | 10.45 | 10.10 | 13.00  |
| 5 %                                                          | 5.20   | 5.65   | 5.30   | 5.45    | 5.95  | 5.80  | 7.30   |
| 1%                                                           | 0.95   | 1.00   | 0.85   | 1.80    | 1.30  | 1.30  | 3.05   |
| $\theta_w = (1.5, 1)$                                        |        |        |        |         |       |       |        |
| 10 %                                                         | 95.30  | 95.75  | 95.05  | 97.10   | 5.00  | 39.10 | 79.05  |
| 5 %                                                          | 90.50  | 91.45  | 90.55  | 94.20   | 2.35  | 23.25 | 66.85  |
| 1%                                                           | 71.45  | 73.00  | 71.60  | 81.70   | 0.25  | 4.80  | 44.25  |
| $\theta_w = (2, 1)$                                          |        |        |        |         |       |       |        |
| 10 %                                                         | 100.00 | 100.00 | 100.00 | 100.00  | 3.35  | 85.30 | 99.95  |
| 5 %                                                          | 100.00 | 100.00 | 100.00 | 100.00  | 0.80  | 68.50 | 99.85  |
| 1%                                                           | 99.95  | 100.00 | 99.95  | 99.95   | 0.00  | 25.70 | 98.60  |
| $\theta_w = (2.5, 1)$                                        |        |        |        |         |       |       |        |
| 10 %                                                         | 100.00 | 100.00 | 100.00 | 100.00  | 1.35  | 98.85 | 100.00 |
| 5 %                                                          | 100.00 | 100.00 | 100.00 | 100.00  | 0.35  | 94.05 | 100.00 |
| 1%                                                           | 100.00 | 100.00 | 100.00 | 100.00  | 0.00  | 59.35 | 100.00 |
| $\theta_w = (3, 1)$                                          |        |        |        |         |       |       |        |
| 10 %                                                         | 100.00 | 100.00 | 100.00 | 100.00  | 0.35  | 99.95 | 100.00 |
| 5 %                                                          | 100.00 | 100.00 | 100.00 | 100.00  | 0.05  | 99.90 | 100.00 |
| 1%                                                           | 100.00 | 100.00 | 100.00 | 100.00  | 0.00  | 87.25 | 100.00 |



**5.0.6 Sample size 100; Censoring percentage 50%**

| Weibull hazard functions                                    |        |        |        |         |       |        |        |
|-------------------------------------------------------------|--------|--------|--------|---------|-------|--------|--------|
| Sample size $n = 100$ ; Censoring 50%; Fixed length-scale 1 |        |        |        |         |       |        |        |
|                                                             | MW1    | MW2    | MW3    | Pearson | LR1   | LR2    | WLR    |
| $\theta_w = (0.5, 1)$                                       |        |        |        |         |       |        |        |
| 10 %                                                        | 95.35  | 95.40  | 95.10  | 97.95   | 83.85 | 99.65  | 93.10  |
| 5 %                                                         | 89.95  | 90.50  | 90.00  | 96.50   | 77.25 | 99.50  | 90.50  |
| 1%                                                          | 70.55  | 72.90  | 70.75  | 90.80   | 61.90 | 98.60  | 81.45  |
| $\theta_w = (1, 1)$                                         |        |        |        |         |       |        |        |
| 10 %                                                        | 9.60   | 9.80   | 9.40   | 12.20   | 10.10 | 9.20   | 14.00  |
| 5 %                                                         | 5.00   | 5.30   | 4.85   | 6.85    | 4.75  | 5.05   | 8.35   |
| 1%                                                          | 0.85   | 1.15   | 0.95   | 2.40    | 1.10  | 1.30   | 2.55   |
| $\theta_w = (1.5, 1)$                                       |        |        |        |         |       |        |        |
| 10 %                                                        | 71.45  | 72.05  | 71.50  | 90.30   | 4.80  | 60.80  | 43.40  |
| 5 %                                                         | 57.05  | 58.15  | 56.90  | 82.85   | 1.80  | 42.75  | 32.20  |
| 1%                                                          | 30.00  | 33.20  | 30.25  | 60.30   | 0.10  | 13.15  | 14.45  |
| $\theta_w = (2, 1)$                                         |        |        |        |         |       |        |        |
| 10 %                                                        | 99.85  | 99.85  | 99.85  | 100.00  | 1.70  | 96.15  | 94.20  |
| 5 %                                                         | 98.90  | 98.90  | 98.90  | 100.00  | 0.20  | 89.90  | 90.25  |
| 1%                                                          | 93.15  | 93.20  | 92.75  | 99.90   | 0.00  | 58.55  | 76.75  |
| $\theta_w = (2.5, 1)$                                       |        |        |        |         |       |        |        |
| 10 %                                                        | 100.00 | 100.00 | 100.00 | 100.00  | 0.40  | 99.90  | 99.85  |
| 5 %                                                         | 100.00 | 100.00 | 100.00 | 100.00  | 0.05  | 99.40  | 99.80  |
| 1%                                                          | 99.95  | 99.95  | 99.95  | 100.00  | 0.00  | 88.40  | 98.95  |
| $\theta_w = (3, 1)$                                         |        |        |        |         |       |        |        |
| 10 %                                                        | 100.00 | 100.00 | 100.00 | 100.00  | 0.00  | 100.00 | 100.00 |
| 5 %                                                         | 100.00 | 100.00 | 100.00 | 100.00  | 0.00  | 99.90  | 100.00 |
| 1%                                                          | 100.00 | 100.00 | 100.00 | 100.00  | 0.00  | 98.25  | 99.90  |

| Weibull hazard functions                                     |        |        |        |         |       |        |        |
|--------------------------------------------------------------|--------|--------|--------|---------|-------|--------|--------|
| Sample size $n = 100$ ; Censoring 50%; Adaptive length-scale |        |        |        |         |       |        |        |
|                                                              | MW1    | MW2    | MW3    | Pearson | LR1   | LR2    | WLR    |
| $\theta_w = (0.5, 1)$                                        |        |        |        |         |       |        |        |
| 10 %                                                         | 99.70  | 99.70  | 99.55  | 97.95   | 83.85 | 99.65  | 93.10  |
| 5 %                                                          | 99.00  | 99.15  | 99.00  | 96.50   | 77.25 | 99.50  | 90.50  |
| 1%                                                           | 93.75  | 94.70  | 93.65  | 90.80   | 61.90 | 98.60  | 81.45  |
| $\theta_w = (1, 1)$                                          |        |        |        |         |       |        |        |
| 10 %                                                         | 9.85   | 10.30  | 9.80   | 12.20   | 10.10 | 9.20   | 14.00  |
| 5 %                                                          | 5.20   | 5.40   | 4.80   | 6.85    | 4.75  | 5.05   | 8.35   |
| 1%                                                           | 0.90   | 1.05   | 0.80   | 2.40    | 1.10  | 1.30   | 2.55   |
| $\theta_w = (1.5, 1)$                                        |        |        |        |         |       |        |        |
| 10 %                                                         | 91.45  | 91.75  | 91.60  | 90.30   | 4.80  | 60.80  | 43.40  |
| 5 %                                                          | 84.40  | 84.70  | 84.35  | 82.85   | 1.80  | 42.75  | 32.20  |
| 1%                                                           | 61.90  | 63.10  | 61.80  | 60.30   | 0.10  | 13.15  | 14.45  |
| $\theta_w = (2, 1)$                                          |        |        |        |         |       |        |        |
| 10 %                                                         | 100.00 | 100.00 | 100.00 | 100.00  | 1.70  | 96.15  | 94.20  |
| 5 %                                                          | 100.00 | 100.00 | 100.00 | 100.00  | 0.20  | 89.90  | 90.25  |
| 1%                                                           | 99.85  | 99.85  | 99.85  | 99.90   | 0.00  | 58.55  | 76.75  |
| $\theta_w = (2.5, 1)$                                        |        |        |        |         |       |        |        |
| 10 %                                                         | 100.00 | 100.00 | 100.00 | 100.00  | 0.40  | 99.90  | 99.85  |
| 5 %                                                          | 100.00 | 100.00 | 100.00 | 100.00  | 0.05  | 99.40  | 99.80  |
| 1%                                                           | 100.00 | 100.00 | 100.00 | 100.00  | 0.00  | 88.40  | 98.95  |
| $\theta_w = (3, 1)$                                          |        |        |        |         |       |        |        |
| 10 %                                                         | 100.00 | 100.00 | 100.00 | 100.00  | 0.00  | 100.00 | 100.00 |
| 5 %                                                          | 100.00 | 100.00 | 100.00 | 100.00  | 0.00  | 99.90  | 100.00 |
| 1%                                                           | 100.00 | 100.00 | 100.00 | 100.00  | 0.00  | 98.25  | 99.90  |

**5.0.7 Sample size 200; Censoring percentage 30%**

| Weibull hazard functions                                    |        |        |        |         |       |        |        |
|-------------------------------------------------------------|--------|--------|--------|---------|-------|--------|--------|
| Sample size $n = 200$ ; Censoring 30%; Fixed length-scale 1 |        |        |        |         |       |        |        |
|                                                             | MW1    | MW2    | MW3    | Pearson | LR1   | LR2    | WLR    |
| $\theta_w = (0.5, 1)$                                       |        |        |        |         |       |        |        |
| 10 %                                                        | 99.90  | 99.95  | 99.95  | 100.00  | 46.05 | 99.95  | 99.95  |
| 5 %                                                         | 99.15  | 99.20  | 99.05  | 100.00  | 36.80 | 99.90  | 99.95  |
| 1%                                                          | 93.10  | 93.70  | 92.85  | 100.00  | 20.90 | 99.30  | 99.60  |
| $\theta_w = (1, 1)$                                         |        |        |        |         |       |        |        |
| 10 %                                                        | 9.90   | 9.80   | 9.70   | 9.15    | 9.85  | 9.20   | 11.70  |
| 5 %                                                         | 5.10   | 5.10   | 5.05   | 5.00    | 5.80  | 4.95   | 6.15   |
| 1%                                                          | 0.85   | 0.90   | 0.65   | 1.20    | 1.30  | 0.70   | 1.40   |
| $\theta_w = (1.5, 1)$                                       |        |        |        |         |       |        |        |
| 10 %                                                        | 96.40  | 96.35  | 96.25  | 100.00  | 6.10  | 72.65  | 98.85  |
| 5 %                                                         | 88.25  | 88.80  | 88.25  | 100.00  | 2.75  | 56.50  | 96.85  |
| 1%                                                          | 60.05  | 62.15  | 60.85  | 99.80   | 0.45  | 22.40  | 88.35  |
| $\theta_w = (2, 1)$                                         |        |        |        |         |       |        |        |
| 10 %                                                        | 100.00 | 100.00 | 100.00 | 100.00  | 5.25  | 99.75  | 100.00 |
| 5 %                                                         | 100.00 | 100.00 | 100.00 | 100.00  | 1.65  | 98.55  | 100.00 |
| 1%                                                          | 100.00 | 100.00 | 100.00 | 100.00  | 0.05  | 85.50  | 100.00 |
| $\theta_w = (2.5, 1)$                                       |        |        |        |         |       |        |        |
| 10 %                                                        | 100.00 | 100.00 | 100.00 | 100.00  | 4.00  | 100.00 | 100.00 |
| 5 %                                                         | 100.00 | 100.00 | 100.00 | 100.00  | 1.00  | 100.00 | 100.00 |
| 1%                                                          | 100.00 | 100.00 | 100.00 | 100.00  | 0.00  | 99.80  | 100.00 |
| $\theta_w = (3, 1)$                                         |        |        |        |         |       |        |        |
| 10 %                                                        | 100.00 | 100.00 | 100.00 | 100.00  | 2.15  | 100.00 | 100.00 |
| 5 %                                                         | 100.00 | 100.00 | 100.00 | 100.00  | 0.20  | 100.00 | 100.00 |
| 1%                                                          | 100.00 | 100.00 | 100.00 | 100.00  | 0.00  | 100.00 | 100.00 |

| Weibull hazard functions                                     |        |        |        |         |       |        |        |
|--------------------------------------------------------------|--------|--------|--------|---------|-------|--------|--------|
| Sample size $n = 200$ ; Censoring 30%; Adaptive length-scale |        |        |        |         |       |        |        |
|                                                              | MW1    | MW2    | MW3    | Pearson | LR1   | LR2    | WLR    |
| $\theta_w = (0.5, 1)$                                        |        |        |        |         |       |        |        |
| 10 %                                                         | 100.00 | 100.00 | 100.00 | 100.00  | 46.05 | 99.95  | 99.95  |
| 5 %                                                          | 100.00 | 100.00 | 100.00 | 100.00  | 36.80 | 99.90  | 99.95  |
| 1%                                                           | 100.00 | 100.00 | 100.00 | 100.00  | 20.90 | 99.30  | 99.60  |
| $\theta_w = (1, 1)$                                          |        |        |        |         |       |        |        |
| 10 %                                                         | 8.95   | 9.00   | 8.95   | 9.15    | 9.85  | 9.20   | 11.70  |
| 5 %                                                          | 4.75   | 4.75   | 4.70   | 5.00    | 5.80  | 4.95   | 6.15   |
| 1%                                                           | 0.80   | 0.95   | 0.90   | 1.20    | 1.30  | 0.70   | 1.40   |
| $\theta_w = (1.5, 1)$                                        |        |        |        |         |       |        |        |
| 10 %                                                         | 99.95  | 100.00 | 99.95  | 100.00  | 6.10  | 72.65  | 98.85  |
| 5 %                                                          | 99.90  | 99.85  | 99.90  | 100.00  | 2.75  | 56.50  | 96.85  |
| 1%                                                           | 98.70  | 98.95  | 98.65  | 99.80   | 0.45  | 22.40  | 88.35  |
| $\theta_w = (2, 1)$                                          |        |        |        |         |       |        |        |
| 10 %                                                         | 100.00 | 100.00 | 100.00 | 100.00  | 5.25  | 99.75  | 100.00 |
| 5 %                                                          | 100.00 | 100.00 | 100.00 | 100.00  | 1.65  | 98.55  | 100.00 |
| 1%                                                           | 100.00 | 100.00 | 100.00 | 100.00  | 0.05  | 85.50  | 100.00 |
| $\theta_w = (2.5, 1)$                                        |        |        |        |         |       |        |        |
| 10 %                                                         | 100.00 | 100.00 | 100.00 | 100.00  | 4.00  | 100.00 | 100.00 |
| 5 %                                                          | 100.00 | 100.00 | 100.00 | 100.00  | 1.00  | 100.00 | 100.00 |
| 1%                                                           | 100.00 | 100.00 | 100.00 | 100.00  | 0.00  | 99.80  | 100.00 |
| $\theta_w = (3, 1)$                                          |        |        |        |         |       |        |        |
| 10 %                                                         | 100.00 | 100.00 | 100.00 | 100.00  | 2.15  | 100.00 | 100.00 |
| 5 %                                                          | 100.00 | 100.00 | 100.00 | 100.00  | 0.20  | 100.00 | 100.00 |
| 1%                                                           | 100.00 | 100.00 | 100.00 | 100.00  | 0.00  | 100.00 | 100.00 |

**5.0.8 Sample size 200; Censoring percentage 50%**

| Weibull hazard functions                                    |        |        |        |         |       |        |        |
|-------------------------------------------------------------|--------|--------|--------|---------|-------|--------|--------|
| Sample size $n = 200$ ; Censoring 50%; Fixed length-scale 1 |        |        |        |         |       |        |        |
|                                                             | MW1    | MW2    | MW3    | Pearson | LR1   | LR2    | WLR    |
| $\theta_w = (0.5, 1)$                                       |        |        |        |         |       |        |        |
| 10 %                                                        | 100.00 | 100.00 | 100.00 | 100.00  | 97.20 | 100.00 | 99.40  |
| 5 %                                                         | 99.85  | 99.90  | 99.90  | 100.00  | 95.35 | 100.00 | 98.95  |
| 1%                                                          | 98.45  | 98.40  | 98.40  | 99.80   | 88.65 | 100.00 | 97.70  |
| $\theta_w = (1, 1)$                                         |        |        |        |         |       |        |        |
| 10 %                                                        | 10.10  | 10.15  | 10.00  | 10.10   | 10.25 | 9.35   | 11.95  |
| 5 %                                                         | 4.70   | 4.70   | 4.60   | 5.40    | 5.25  | 4.60   | 7.05   |
| 1%                                                          | 0.70   | 0.80   | 0.65   | 1.55    | 1.20  | 0.90   | 2.20   |
| $\theta_w = (1.5, 1)$                                       |        |        |        |         |       |        |        |
| 10 %                                                        | 95.50  | 95.80  | 95.30  | 99.65   | 6.35  | 90.75  | 74.65  |
| 5 %                                                         | 88.35  | 88.60  | 88.20  | 99.15   | 2.15  | 81.60  | 62.35  |
| 1%                                                          | 66.45  | 67.80  | 66.60  | 95.80   | 0.15  | 50.05  | 38.80  |
| $\theta_w = (2, 1)$                                         |        |        |        |         |       |        |        |
| 10 %                                                        | 100.00 | 100.00 | 100.00 | 100.00  | 2.45  | 100.00 | 99.95  |
| 5 %                                                         | 100.00 | 100.00 | 100.00 | 100.00  | 0.50  | 100.00 | 99.90  |
| 1%                                                          | 100.00 | 100.00 | 100.00 | 100.00  | 0.00  | 98.20  | 98.85  |
| $\theta_w = (2.5, 1)$                                       |        |        |        |         |       |        |        |
| 10 %                                                        | 100.00 | 100.00 | 100.00 | 100.00  | 0.30  | 100.00 | 100.00 |
| 5 %                                                         | 100.00 | 100.00 | 100.00 | 100.00  | 0.10  | 100.00 | 100.00 |
| 1%                                                          | 100.00 | 100.00 | 100.00 | 100.00  | 0.00  | 100.00 | 100.00 |
| $\theta_w = (3, 1)$                                         |        |        |        |         |       |        |        |
| 10 %                                                        | 100.00 | 100.00 | 100.00 | 100.00  | 0.20  | 100.00 | 100.00 |
| 5 %                                                         | 100.00 | 100.00 | 100.00 | 100.00  | 0.00  | 100.00 | 100.00 |
| 1%                                                          | 100.00 | 100.00 | 100.00 | 100.00  | 0.00  | 100.00 | 100.00 |

| Weibull hazard functions                                     |        |        |        |         |       |        |        |
|--------------------------------------------------------------|--------|--------|--------|---------|-------|--------|--------|
| Sample size $n = 200$ ; Censoring 50%; Adaptive length-scale |        |        |        |         |       |        |        |
|                                                              | MW1    | MW2    | MW3    | Pearson | LR1   | LR2    | WLR    |
| $\theta_w = (0.5, 1)$                                        |        |        |        |         |       |        |        |
| 10 %                                                         | 100.00 | 100.00 | 100.00 | 100.00  | 97.20 | 100.00 | 99.40  |
| 5 %                                                          | 100.00 | 100.00 | 100.00 | 100.00  | 95.35 | 100.00 | 98.95  |
| 1%                                                           | 100.00 | 100.00 | 100.00 | 99.80   | 88.65 | 100.00 | 97.70  |
| $\theta_w = (1, 1)$                                          |        |        |        |         |       |        |        |
| 10 %                                                         | 9.40   | 9.60   | 9.10   | 10.10   | 10.25 | 9.35   | 11.95  |
| 5 %                                                          | 4.25   | 4.40   | 4.45   | 5.40    | 5.25  | 4.60   | 7.05   |
| 1%                                                           | 0.75   | 0.85   | 0.85   | 1.55    | 1.20  | 0.90   | 2.20   |
| $\theta_w = (1.5, 1)$                                        |        |        |        |         |       |        |        |
| 10 %                                                         | 99.95  | 99.95  | 99.95  | 99.65   | 6.35  | 90.75  | 74.65  |
| 5 %                                                          | 99.60  | 99.60  | 99.70  | 99.15   | 2.15  | 81.60  | 62.35  |
| 1%                                                           | 95.60  | 95.65  | 95.85  | 95.80   | 0.15  | 50.05  | 38.80  |
| $\theta_w = (2, 1)$                                          |        |        |        |         |       |        |        |
| 10 %                                                         | 100.00 | 100.00 | 100.00 | 100.00  | 2.45  | 100.00 | 99.95  |
| 5 %                                                          | 100.00 | 100.00 | 100.00 | 100.00  | 0.50  | 100.00 | 99.90  |
| 1%                                                           | 100.00 | 100.00 | 100.00 | 100.00  | 0.00  | 98.20  | 98.85  |
| $\theta_w = (2.5, 1)$                                        |        |        |        |         |       |        |        |
| 10 %                                                         | 100.00 | 100.00 | 100.00 | 100.00  | 0.30  | 100.00 | 100.00 |
| 5 %                                                          | 100.00 | 100.00 | 100.00 | 100.00  | 0.10  | 100.00 | 100.00 |
| 1%                                                           | 100.00 | 100.00 | 100.00 | 100.00  | 0.00  | 100.00 | 100.00 |
| $\theta_w = (3, 1)$                                          |        |        |        |         |       |        |        |
| 10 %                                                         | 100.00 | 100.00 | 100.00 | 100.00  | 0.20  | 100.00 | 100.00 |
| 5 %                                                          | 100.00 | 100.00 | 100.00 | 100.00  | 0.00  | 100.00 | 100.00 |
| 1%                                                           | 100.00 | 100.00 | 100.00 | 100.00  | 0.00  | 100.00 | 100.00 |
